# Supplementary material for: The genomic diversity of Taiwanese Austronesian groups: Implications for the “Into- and Out-of-Taiwan” models
Source: PubMed Central journal article supplement (PMC10187666; doi:10.1093/pnasnexus/pgad122), 2023-05-16
Supplement: pgad122_supplementary_data.pdf [file pgad122_supplementary_data.pdf]

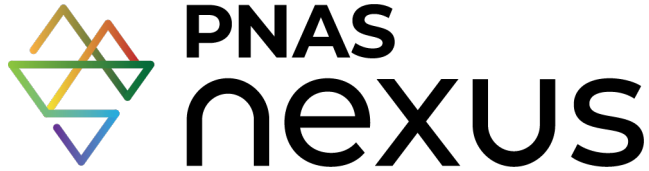

1  
2  
3  
4  
5  
6  
7  
8  
9  
10  
11  
12  
13  
14  
15  
16  
17  
18  
19  
20  
21

**Supplementary Information for**

The genomic diversity of Taiwanese Austronesian groups: implications for the 'Into and Out of Taiwan' models

Dang Liu<sup>\*</sup>, Albert Min-Shan Ko and Mark Stoneking<sup>\*</sup>

<sup>\*</sup>Corresponding authors: Dang Liu and Mark Stoneking  
Email: [dang.liu@pasteur.fr](mailto:dang.liu@pasteur.fr) and [stoneking@eva.mpg.de](mailto:stoneking@eva.mpg.de)

**This PDF file includes:**

- Supplementary text
- SI References
- Figures S1 to S17
- Table S1

## 22 **Supplementary Information Text**

23

## 24 **Extended Materials and Methods**

25

### 26 **Sample and data information**

27 Sampling of Taiwanese individuals was done in Ko et al (1); we selected a total of 43 Austronesian (37  
28 highlanders from Atayal, Bunun, Rukai, Paiwan, Ami; 1 Tao; and 5 Makatao lowlanders) and 12  
29 Taiwanese Han (Hakka; Minnan) individuals and generated their genome-wide data on the Affymetrix  
30 Human Origins array. The ethics committees of the China Medical University, the Taiwan National  
31 Health Research Institutes, and the University of Leipzig Medical Faculty have approved this study.  
32 Informed consent was obtained from all participants. We first merged the new data with published data  
33 on the same array from comparative modern populations (2-9) and we kept only autosomal markers for  
34 our analyses. For quality control of the merged data of modern individuals, we excluded sites with more  
35 than 5% missing data in the entire dataset and sites with more than 50% missing data and/or Hardy-  
36 Weinberg equilibrium p values below 0.00005 within a group (except for groups with only one individual).  
37 We removed individuals with more than 5% missing data and we excluded one individual from 1<sup>st</sup>  
38 degree kinship pairs. Data missingness and Hardy-Weinberg equilibrium were calculated using PLINK  
39 v1.9 (10) while the individuals to be removed to avoid 1st degree relatedness (kinship coefficient  $\geq$   
40 0.177) were inferred using KING (11), as implemented in PLINK v2 (12). This gives a filtered dataset of  
41 modern individuals consisting of 540,697 SNPs and 1,664 individuals. Next, we further merged the  
42 filtered dataset with comparative ancient genomes (5, 6, 9, 13-21). Six positions with more than two  
43 variants or that were inconsistent between the array and sequencing data were excluded. Ancient  
44 individuals with  $<15,000$  informative sites were also removed. This gives a filtered dataset of modern  
45 and ancient individuals consisting of 540,691 SNPs and 1,958 individuals. For Principal Component  
46 Analysis (PCA), ADMIXTURE, and DyStruct analyses (described in below sections), variants were  
47 pruned beforehand for linkage disequilibrium using PLINK v1.9, excluding one variant from pairs with  
48  $r^2 > 0.4$  within windows of 200 variants and a step size of 25 variants. Metadata are in Table S1.

49

### 50 **PCA analyses**

51 PCA was done with smartpca v16000 (22). Projection of groups on PCA was done with the "lsqproject"  
52 and "shrinkmode" options.

53

### 54 **ADMIXTURE and DyStruct analyses**

55 The clustering algorithm was first run by ADMIXTURE v1.3.0 (23). From  $K = 2$  to  $K = 15$ , we performed  
56 100 replicates for each  $K$  with random seeds. ADMIXTURE outliers with  $>0.01$  of the turquoise (Han-  
57 related) component were excluded for the Amis (TA199, TA81), Bunun (bun55, bun32), Atayal\_HO  
58 (NA13600), and Kankanaey (Igorot11) groups in the F-statistics based analyses (e.g.,  $f_3$ ,  $f_4$ , qpAdm,  
59 admixture graph, described in the below sections). We also performed DyStruct v1.1.0 (24)  
60 incorporating time-series data from ancient genomes for the model. We transformed the age of ancient  
61 genomes into generations using a generation time of 30 years (25) and binned every 50 generations  
62 into a time point using the script bin\_sample\_times.py. From  $K = 2$  to  $K = 15$ , we performed 25 replicates  
63 for each  $K$  with random seeds. Then, we used the script plot\_Q.py to plot the highest likelihood results  
64 for the best  $K$  of ADMIXTURE ( $K=9$ , with the lowest cross-validation error) and DyStruct ( $K=8$ , with the  
65 highest likelihood). Scripts bin\_sample\_times.py and plot\_Q.py are provided by the authors of DyStruct  
66 (available here: <https://github.com/tyjo/dystruct/tree/master/supp/scripts>).

67

### 68 **F3 and F4 statistics and qpAdm analyses**

69 We used admixr v0.9.1 (26) to compute  $f_3$ - and  $f_4$ -statistics from ADMIXTOOLS v7.0.2 (2), with  
70 significance assessed through block jackknife resampling across the genome. We also used admixr to  
71 compute qpAdm from ADMIXTOOLS with option inbreed = "YES" (required if using a single individual  
72 as a source or outgroup). We merged additional outgroups (27-35) to follow Yang et al (18), with  
73 metadata available in Table S1. The target groups are all Taiwanese groups and selected Tai-Kadai  
74 (Dong\_Guizhou, Dong\_Hunan, Gelao, Li, Maonan, Mulam, Zhuang), Han (Han\_Fujian,  
75 Han\_Guangdong, Han\_Shandong, Han\_Shanghai, Han\_Henan, Han\_Hubei), ancient nEA  
76 (Xiaojingshan\_7800BP, Xiaogao\_8700BP, Wuzhuangguoliang\_5000BP) and ancient sEA  
77 (Suogang\_4550BP, Xitoucun\_4500BP, Tanshishan\_4350BP, Hanben\_1550BP, Shenxian\_1300BP,  
78 BaBanQinCen\_1500BP) groups; the source groups are nEA Boshan\_8200BP and sEA  
79 Liangdao\_7750BP; the outgroups are Mota\_4470BP, Ust\_Ishim\_44350BP, Kostenki\_38050BP,  
80 Iran\_10000BP, Yana\_31850BP, Karelia\_8450BP, Okunevo\_4300BP, Indus\_Periphery\_4500BP,  
81 New\_Guinea\_Highlander, Onge, Upward\_Sun\_River\_11400BP, Tianyuan\_40000BP,

82 Longlin\_10550BP, Kolyma\_9750BP, Jomon\_2800BP, Qihe\_11550BP, Bianbian\_9500BP, Mbuti,  
83 French, Australian, Tu, She, Ami, Kinh, and Baining. In contrast to the outgroups used in Yang et al,  
84 we substituted the 7 kya Pha Faen genome (14) (which overlaps with the Onge in terms of Hoabinhian-  
85 related ancestry) with the 10 kya Longlin genome (19) to provide more distinct sEA outgroups. We  
86 excluded results with negative values inferred for either one of the sources, p-values > 0.05, or the  
87 absolute values of the standard error > 0.25.

### 88 89 **Data phasing**

90 Phasing was done by SHAPEIT version 4.1.3 (36), with the East Asian (without the Kinh Vietnamese  
91 merged in our data set) and South Asian populations as a reference panel, and the recombination map  
92 from the 1000 Genomes Phase3 (37). To prepare the reference panel, we extracted the East and South  
93 Asian individuals as well as the overlapping sites with our data for each chromosome from the 1000  
94 Genomes Phase3 data using bcftools version 1.4 (<http://samtools.github.io/bcftools/>; last accessed 10  
95 July, 2020). The phasing accuracy of SHAPEIT4 can be enhanced by increasing the number of  
96 conditioning neighbors in the Positional Burrows–Wheeler Transform (PBWT) on which haplotype  
97 estimation is based (36). We ran phasing with the options `-pbwt-depth 8` for 8 conditioning neighbors  
98 and left other parameters as default.

### 99 100 **ChromoPainter, fineSTRUCTURE and GLOBETROTTER analyses**

101 ChromoPainter v2 (38) was run on the phased dataset focusing only on the Austronesian, Tai-Kadai,  
102 and Sino-Tibetan speaking groups, with sample sizes for each population group randomly down-  
103 sampled to 7 (all individuals were used for groups with sample sizes below 7). We began with 10  
104 iterations of the EM (expectation maximization) process to estimate the switch rate and global mutation  
105 probability using chromosomes 1, 5, 10, 15, and 20. With the estimated switch and global mutation  
106 rates, we ran the chromosomal painting process for all chromosomes, which then gave the output for  
107 downstream analyses. We first attempted to paint the chromosomes of each individual, using all of the  
108 samples in the dataset as both donors and recipients, via the `-a` argument. The EM estimation of switch  
109 rate and global mutation probability were  $\sim 409.33$  and  $\sim 0.00048$ , respectively, which were then used  
110 as the starting values for these parameters for all donors in the painting process. To specifically study  
111 the contribution of the THI groups (Formosan branches) as sources for other Austronesians (Malayo-  
112 Polynesian branch), we also performed another run using all the samples except for the non-THI  
113 Austronesians as both donors and recipients; the non-THI Austronesians were used only as recipients.  
114 The EM estimation of switch rate and global mutation probability for this analysis were  $\sim 430.08$  and  $\sim$   
115  $0.00064$ , respectively.

116 `fineSTRUCTURE v4.0.1` (38) was run on the first ChromoPainter output using all of the samples  
117 in the dataset as both donors and recipients. First, 1 million burn-in steps were used (`-x`) and 1 million  
118 further iterations were sampled (`-y`) keeping every 10000th sample (`-z`). To infer a tree (`-m T`), we ran  
119 an additional 100,000 burn-in steps (`-x`) and used the maximum number of 3000 tree comparisons for  
120 splitting/merging (`-t`). We processed and plotted the results in R with the assistance of `fineSTRUCTURE`  
121 R Tools (<https://people.maths.bris.ac.uk/~madjl/finestructure/finestructureR.html>).

122 To investigate the admixture of Austronesian and Han ancestries in the Lowland group Makatao,  
123 GLOBETROTTER (39) was run on the second ChromoPainter output using the THI/TOI Austronesian,  
124 Tai-Kadai, and Sino-Tibetan groups as surrogates. We first tested the certainty and potential waves of  
125 admixture events, and then estimated the major and minor sources as well as the dates of admixture.  
126 A single pulse of admixture was inferred for the Makatao. The standard error was computed from the  
127 distribution of admixture dates accessed through 100 bootstraps. A generation time of 30 years was  
128 used for transforming generations to years (25).

### 129 130 **Identity by descent (IBD) analyses**

131 We identified shared IBD blocks between each pair of individuals and homozygous-by-descent (HBD)  
132 blocks within each individual using RefinedIBD (40). Both identified IBD and HBD blocks are considered  
133 as IBD blocks in our analyses, which is analogous to pairwise shared coalescence (PSC) segments in  
134 a previous study (41). The IBD blocks within a 0.6 cM gap were merged using the program `merge-ibd-`  
135 `segments` from the RefinedIBD website (<https://faculty.washington.edu/browning/refined-ibd.html>),  
136 allowing only 1 inconsistent genotype between the gap and block regions. We used IBD blocks at least  
137 2 cM in length shared by individuals within a population to investigate the demography of each  
138 population group. Then, we used IBD blocks in 1-5 cM, 5-10 cM, and over 10 cM ranges to investigate  
139 the sharing between individuals from different populations in different time periods (41). To visualize  
140 the sharing between populations, the pairs with an average of at least 0.5 shared IBD blocks (i.e., on  
141 average half of the pairs share IBD blocks) were kept to reduce noise and false positives. The average

142 of the summed IBD length/number of blocks between two groups was calculated by dividing the  
143 summed IBD length/number of blocks between all pairs of individuals from the two groups by the  
144 product of the number of individuals from one group and the number of individuals from the other group.  
145

#### 146 **Admixture graph analyses**

147 We selected groups to test our questions concerning the admixture profile of the Lowland group  
148 Makatao (Fig. S6), and the Into-Taiwan (Fig. S10) and Out-of-Taiwan (Fig. S14) events. For ancient  
149 groups, we removed individuals with more than 30% missing data except for individual TON002 from  
150 ~2.6 kya Tonga, who is the highest quality ancient Lapita individual and is needed for the Out-of-Taiwan  
151 model. We used ADMIXTOOLS 2 (42) to compute pairwise  $f_2$  statistics between the groups using  
152 `extract_f2()` with `maxmiss=1` (no SNPs excluded) and then extracted the allele frequency products from  
153 the computed  $f_2$  blocks using `f2_from_precomp()` with `afprod=TRUE` (which will result in more precise  
154  $f_4$ -statistics when there are large amounts of missing data, as described on the tool website:  
155 <https://uqrmaie1.github.io/admixtools/>). Finally, for each of the scenarios, we searched for the best-  
156 fitting admixture graph by running ten independent runs of `find_graphs()` and selected the one with the  
157 lowest score (computed through the residuals between the expected and observed  $f$ -statistics given the  
158 data). We further confirmed a fitting graph by testing the graph with the lowest score using `qpgraph()`  
159 to check if the absolute value of the worst-fitting Z score is below 3. We started with no migrations  
160 (`numadmix=0`) and then added migrations until we found a fitting graph, which we denoted as the best-  
161 fitting graph for that scenario. We also added different admixture constraints for searching the graphs  
162 depending on our questions; for the admixture profile of the Makatao, at least 1 admixture for the  
163 Makatao, and no admixtures for the Atayal, Rukai, and Amis; for the Into-Taiwan event(s), no  
164 admixtures for the ~8.2 kya Boshan and ~7.7 kya Liangdao; for the Out-of-Taiwan event(s), no  
165 admixtures for the New Guinea Highlander, Atayal, and Rukai.  
166

#### 167 **SI References**

- 169 1. A. M. Ko *et al.*, Early Austronesians: into and out of Taiwan. *Am J Hum Genet* **94**, 426-436  
170 (2014).
- 171 2. N. Patterson *et al.*, Ancient admixture in human history. *Genetics* **192**, 1065-1093 (2012).
- 172 3. I. Lazaridis *et al.*, Ancient human genomes suggest three ancestral populations for present-  
173 day Europeans. *Nature* **513**, 409-413 (2014).
- 174 4. P. Qin, M. Stoneking, Denisovan Ancestry in East Eurasian and Native American Populations.  
175 *Mol Biol Evol* **32**, 2665-2674 (2015).
- 176 5. P. Skoglund *et al.*, Genomic insights into the peopling of the Southwest Pacific. *Nature* **538**,  
177 510-513 (2016).
- 178 6. M. Lipson *et al.*, Ancient genomes document multiple waves of migration in Southeast Asian  
179 prehistory. *Science* **361**, 92-95 (2018).
- 180 7. D. Liu *et al.*, Extensive Ethnolinguistic Diversity in Vietnam Reflects Multiple Sources of  
181 Genetic Diversity. *Mol Biol Evol* **37**, 2503-2519 (2020).
- 182 8. W. Kutanan *et al.*, Reconstructing the Human Genetic History of Mainland Southeast Asia:  
183 Insights from Genome-Wide Data from Thailand and Laos. *Mol Biol Evol* **38**, 3459-3477  
184 (2021).
- 185 9. C. C. Wang *et al.*, Genomic insights into the formation of human populations in East Asia.  
186 *Nature* **591**, 413-+ (2021).
- 187 10. S. Purcell *et al.*, PLINK: A Tool Set for Whole-Genome Association and Population-Based  
188 Linkage Analyses. *The American Journal of Human Genetics* **81**, 559-575 (2007).
- 189 11. A. Manichaikul *et al.*, Robust relationship inference in genome-wide association studies.  
190 *Bioinformatics* **26**, 2867-2873 (2010).
- 191 12. C. C. Chang *et al.*, Second-generation PLINK: Rising to the challenge of larger and richer  
192 datasets. *GigaScience* **4**, 1-16 (2015).
- 193 13. M. A. Yang *et al.*, 40,000-Year-Old Individual from Asia Provides Insight into Early Population  
194 Structure in Eurasia. *Current Biology* **27**, 3202-3208.e3209 (2017).
- 195 14. H. McColl *et al.*, The prehistoric peopling of Southeast Asia. *Science* **361**, 88-92 (2018).
- 196 15. M. Lipson *et al.*, Population Turnover in Remote Oceania Shortly after Initial Settlement.  
197 *Current Biology* **28**, 1157-1165.e1157 (2018).
- 198 16. C. Posth *et al.*, Language continuity despite population replacement in Remote Oceania.  
199 *Nature Ecology and Evolution* **2**, 731-740 (2018).
- 200 17. M. Lipson *et al.*, Three Phases of Ancient Migration Shaped the Ancestry of Human  
201 Populations in Vanuatu. *Curr Biol* **30**, 4846-4856 e4846 (2020).



- 202 18. M. A. Yang *et al.*, Ancient DNA indicates human population shifts and admixture in northern  
203 and southern China. *Science* **369**, 282-+ (2020).
- 204 19. T. Y. Wang *et al.*, Human population history at the crossroads of East and Southeast Asia  
205 since 11,000 years ago. *Cell* **184**, 3829-+ (2021).
- 206 20. I. Pugach *et al.*, Ancient DNA from Guam and the peopling of the Pacific. *Proc Natl Acad Sci*  
207 *U S A* **118** (2021).
- 208 21. S. Oliveira *et al.*, Ancient genomes from the last three millennia support multiple human  
209 dispersals into Wallacea. *Nat Ecol Evol* **6**, 1024-1034 (2022).
- 210 22. N. Patterson, A. L. Price, D. Reich, Population Structure and Eigenanalysis. *PLoS genetics* **2**,  
211 e190 (2006).
- 212 23. D. H. Alexander, J. Novembre, K. Lange, Fast model-based estimation of ancestry in  
213 unrelated individuals. *Genome research* **19**, 1655-1664 (2009).
- 214 24. T. A. Joseph, I. Pe'er, Inference of Population Structure from Time-Series Genotype Data. *Am*  
215 *J Hum Genet* **105**, 317-333 (2019).
- 216 25. J. N. Fenner, Cross-cultural estimation of the human generation interval for use in genetics-  
217 based population divergence studies. *Am J Phys Anthropol* **128**, 415-423 (2005).
- 218 26. M. Petr, B. Vernot, J. Kelso, admixr —R package for reproducible analyses using  
219 ADMIXTOOLS *Bioinformatics* 10.1093/bioinformatics/btz030, 1-2 (2019).
- 220 27. Q. Fu *et al.*, Genome sequence of a 45,000-year-old modern human from western Siberia.  
221 *Nature* **514**, 445-449 (2014).
- 222 28. A. Seguin-Orlando *et al.*, Paleogenomics. Genomic structure in Europeans dating back at  
223 least 36,200 years. *Science* **346**, 1113-1118 (2014).
- 224 29. M. Gallego Llorente *et al.*, Ancient Ethiopian genome reveals extensive Eurasian admixture  
225 throughout the African continent. *Science* **350**, 820-822 (2015).
- 226 30. I. Lazaridis *et al.*, Genomic insights into the origin of farming in the ancient Near East. *Nature*  
227 **536**, 419-424 (2016).
- 228 31. Q. Fu *et al.*, The genetic history of Ice Age Europe. *Nature* **534**, 200-205 (2016).
- 229 32. J. V. Moreno-Mayar *et al.*, Early human dispersals within the Americas. *Science* **362** (2018).
- 230 33. P. B. Damgaard *et al.*, The first horse herders and the impact of early Bronze Age steppe  
231 expansions into Asia. *Science* **360** (2018).
- 232 34. V. M. Narasimhan *et al.*, The formation of human populations in South and Central Asia.  
233 *Science* **365** (2019).
- 234 35. M. Sikora *et al.*, The population history of northeastern Siberia since the Pleistocene. *Nature*  
235 **570**, 182-188 (2019).
- 236 36. O. Delaneau, J. F. Zagury, M. R. Robinson, J. L. Marchini, E. T. Dermitzakis, Accurate,  
237 scalable and integrative haplotype estimation. *Nat Commun* **10**, 5436 (2019).
- 238 37. C. Genomes Project *et al.*, A global reference for human genetic variation. *Nature* **526**, 68-74  
239 (2015).
- 240 38. D. J. Lawson, G. Hellenthal, S. Myers, D. Falush, Inference of Population Structure using  
241 Dense Haplotype Data. *Plos Genetics* **8** (2012).
- 242 39. G. Hellenthal *et al.*, A Genetic Atlas of Human Admixture History. *Science* **343**, 747-751  
243 (2014).
- 244 40. B. L. Browning, S. R. Browning, Improving the accuracy and efficiency of identity-by-descent  
245 detection in population data. *Genetics* **194**, 459-471 (2013).
- 246 41. H. Al-Asadi, D. Petkova, M. Stephens, J. Novembre, Estimating recent migration and  
247 population-size surfaces. *PLoS genetics* **15**, e1007908 (2019).
- 248 42. R. Maier, P. Flegontov, O. Flegontova, P. Changmai, D. Reich, On the limits of fitting complex  
249 models of population history to genetic data. *bioRxiv* 10.1101/2022.05.08.491072 (2022).

250

251

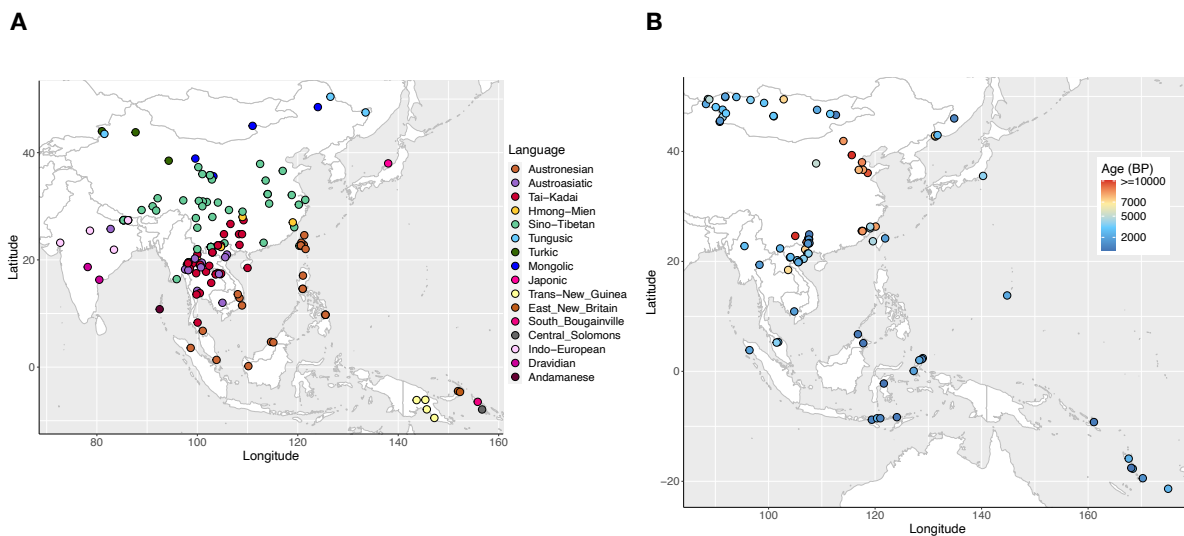

254  
255 **Fig. S1. Map of comparative data.** Maps of comparative (A) modern and (B) ancient published data,  
256 colored by languages and sample ages, respectively. More details are in Table S1.  
257

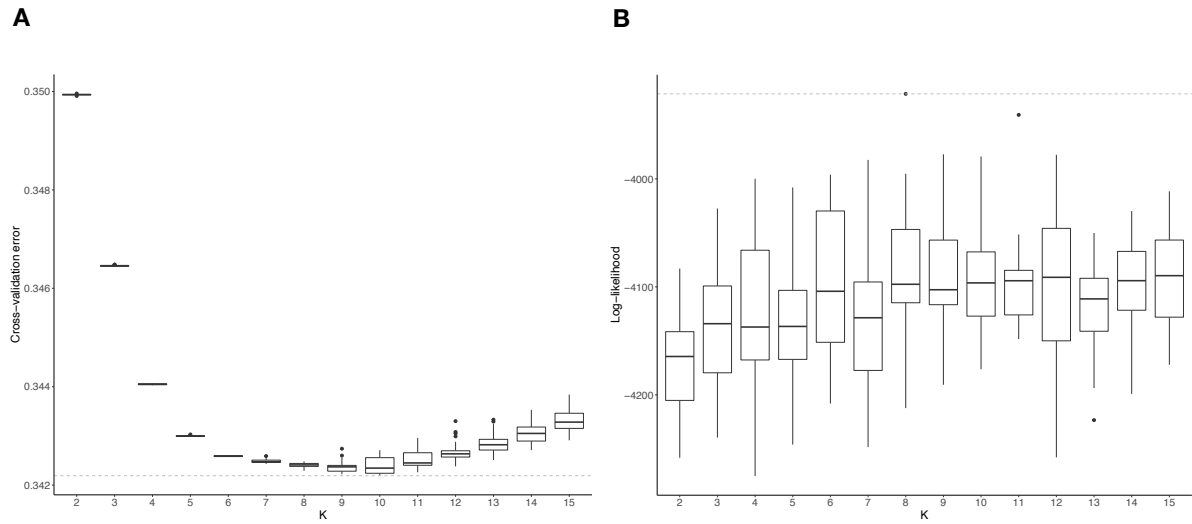

258  
 259  
 260  
 261  
 262  
 263  
 264

**Fig. S2. Identifying the best-fitting K for ADMIXTURE and DyStruct analyses.** (A) Cross-validation error plot for ADMIXTURE from K = 2 to K = 15. The best-fitting K (lowest cross-validation error) is K = 9. (B) Likelihood plot for DyStruct from K = 2 to K = 15, indicating that the best-fitting K (highest likelihood) is K = 8. We ran 100 independent runs for ADMIXTURE (20 for DyStruct) for each K, and we show the runs with the highest likelihood for the best-fitting values of K in Fig. 2.

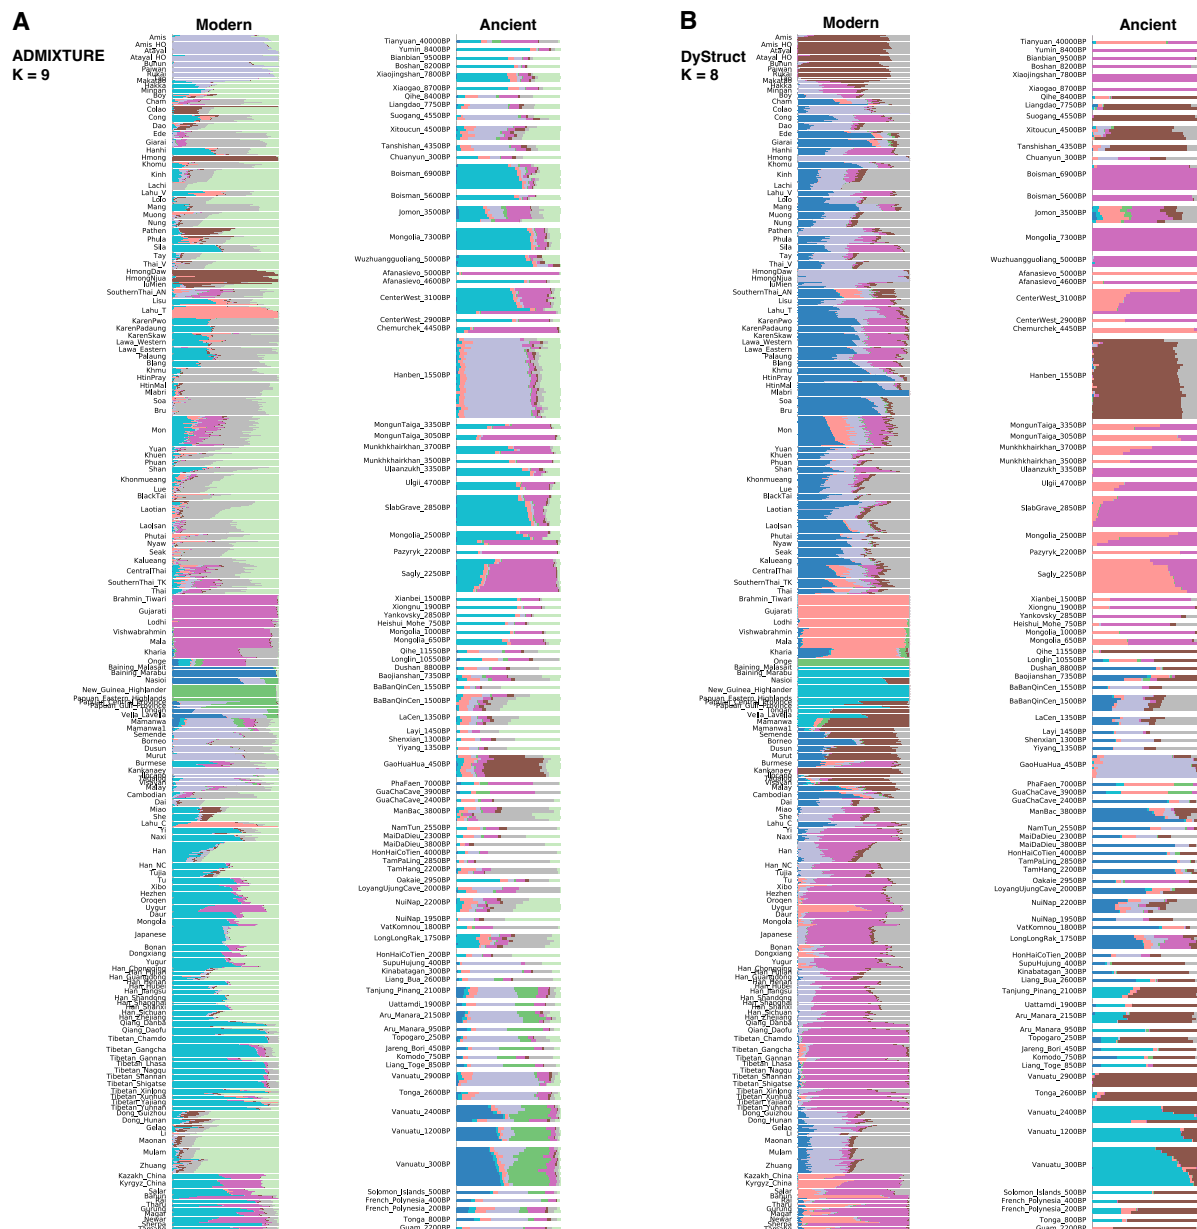

266  
267  
268  
269  
270

**Fig. S3. Full results of the best-fitting K for the ADMIXTURE and DyStruct analyses.** The highest likelihood run of (A) ADMIXTURE for K = 9 and (B) DyStruct for K = 8, with the modern groups listed on the left and the ancient samples on the right.

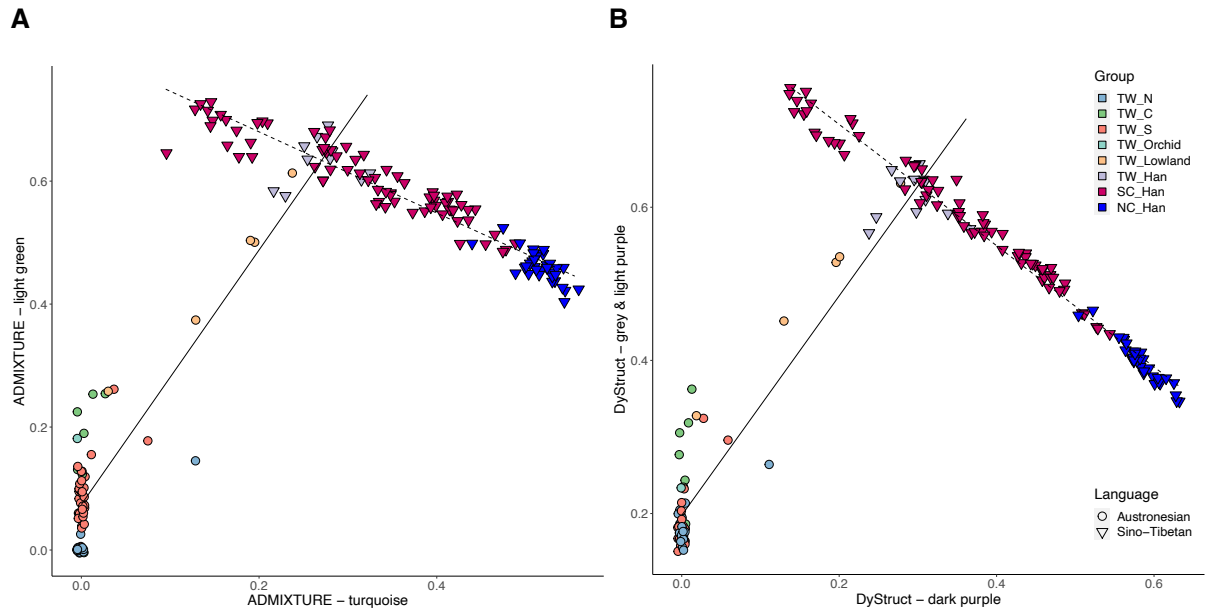

271  
 272  
 273  
 274  
 275  
 276  
 277  
 278  
 279  
 280  
 281  
 282

**Fig. S4. ADMIXTURE and DyStruct Han-related components in the Taiwanese groups.** We plotted the components that showed in some Taiwanese groups and were largely shared with the Han groups from China from the best-fitting K of (A) ADMIXTURE and (B) DyStruct results. Individuals were plotted as dots/triangles (according to language) and colored by groups. TW denotes Taiwan, and N, C, S denote northern, central, southern Highland groups, respectively. SC\_Han/NC\_Han denote the southern/northern Han groups from China. The light green ADMIXTURE (grey and light purple DyStruct) component is negatively correlated with the turquoise ADMIXTURE (dark purple DyStruct) component for the Chinese Han groups ( $r^2=0.921$ ,  $p=0$  for ADMIXTURE;  $r^2=0.983$ ,  $p=0$  for DyStruct), but they are positively correlated in the Taiwanese groups ( $r^2=0.913$ ,  $p=0$  for ADMIXTURE;  $r^2=0.926$ ,  $p=0$  for DyStruct).

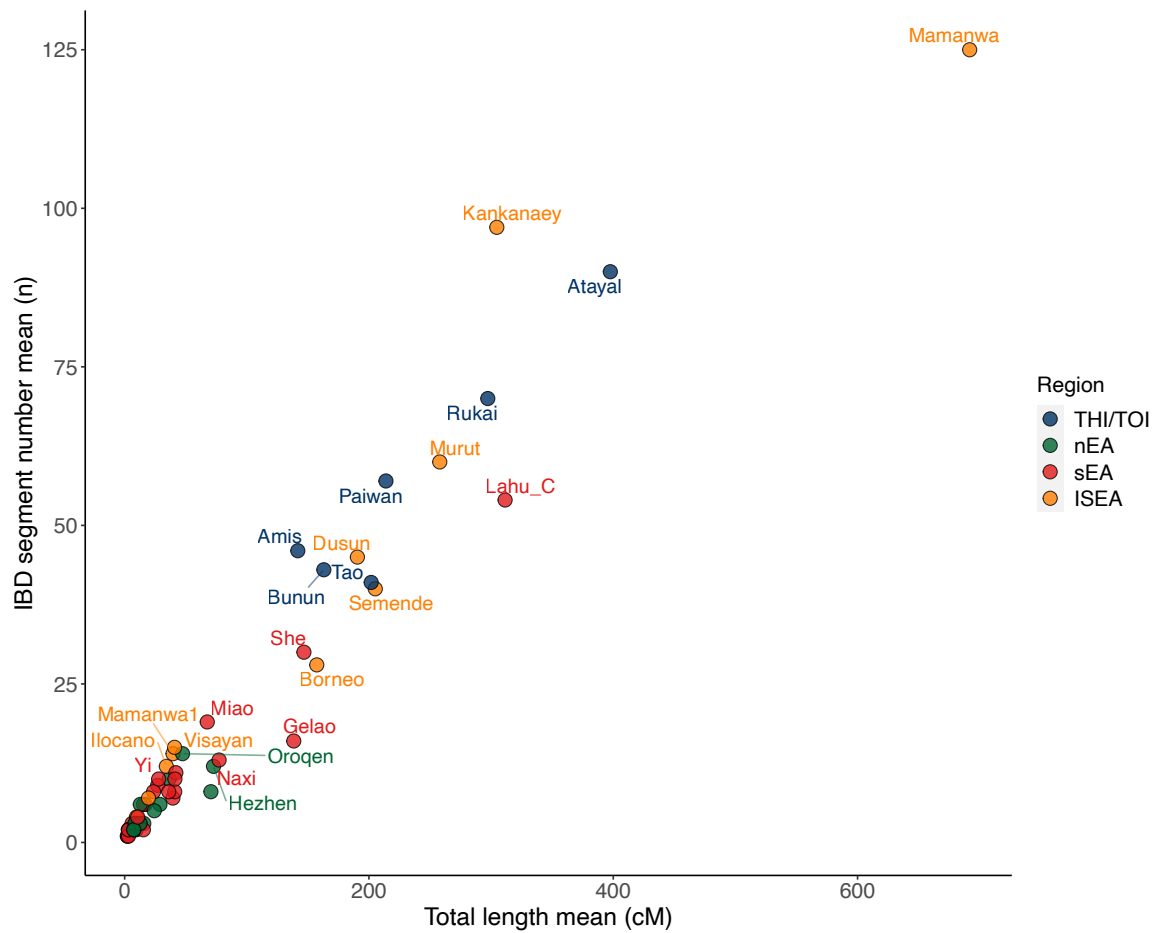

283  
 284 **Fig. S5. Within group IBD sharing.** We plotted on the x-axis the mean of the summed length of IBD  
 285 segments, and on the y-axis the mean number of IBD segments for groups from nEA, sEA, and ISEA  
 286 (colored accordingly). The THI/TOI groups are highlighted in another color.  
 287

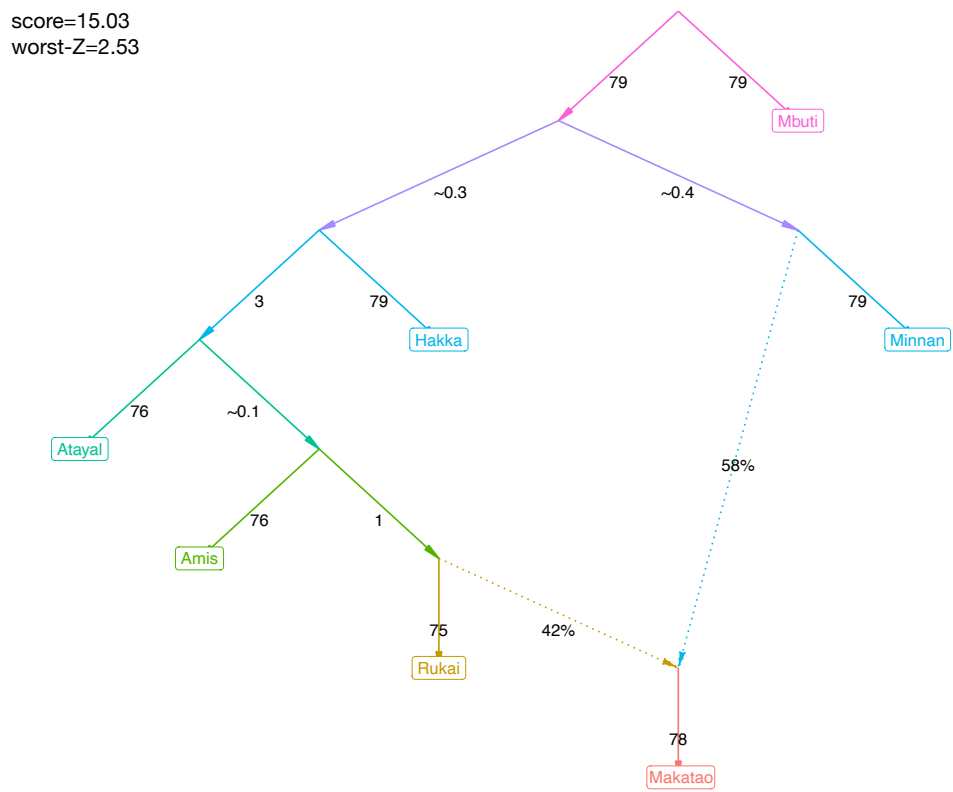

289  
290  
291  
292  
293  
294

**Fig. S6. Best-fitting admixture graph for investigating admixture in the Lowland group Makatao.** The numbers on the solid branch lines are in genetic drift units while those on the dashed lines indicate ancestry proportions. The ADMIXTOOLS 2 graph score and the worst-fitting Z score are shown on the top-left.

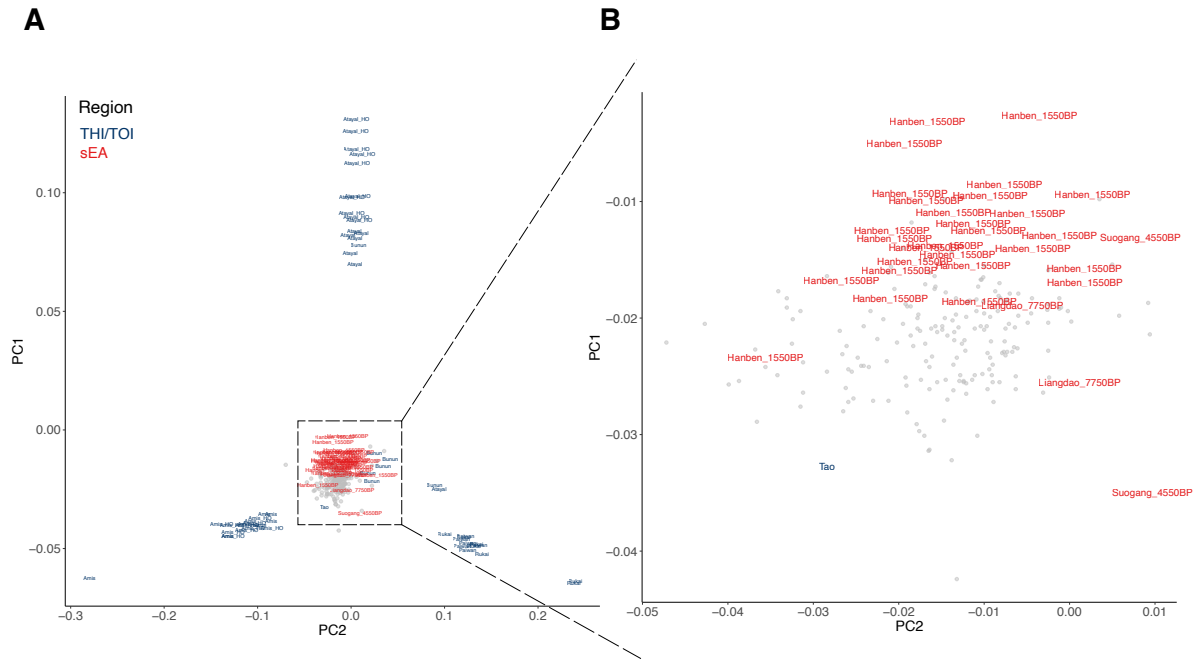

295  
 296  
 297  
 298  
 299  
 300

**Fig. S7. THI/TOI PCA with a focus on the projected ancient Taiwan-related individuals.** (A) the full results and (B) zoom-in of (A) on the projected ancient sEA individuals. Our focusing groups are colored by regions while the other projected ancient individuals are colored in grey to provide an overall background variation.



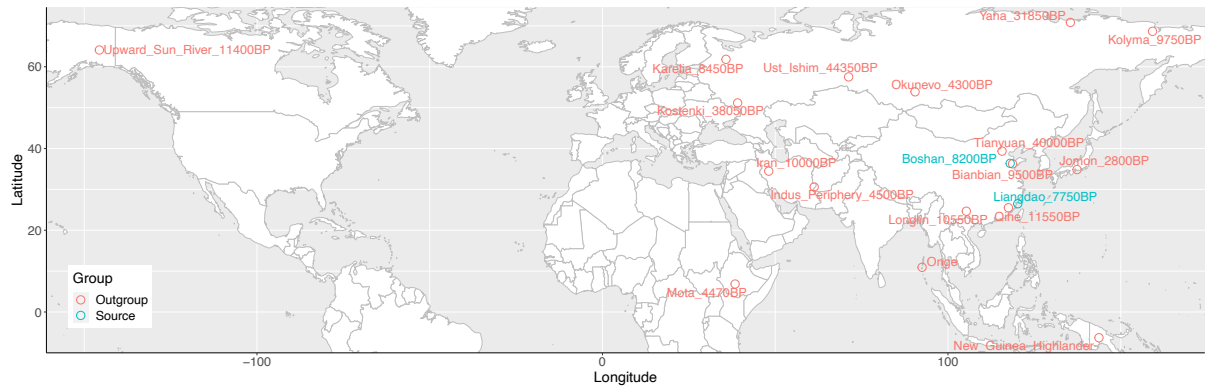

301  
 302 **Fig. S8. Map of source groups and outgroups for qpAdm.**  
 303

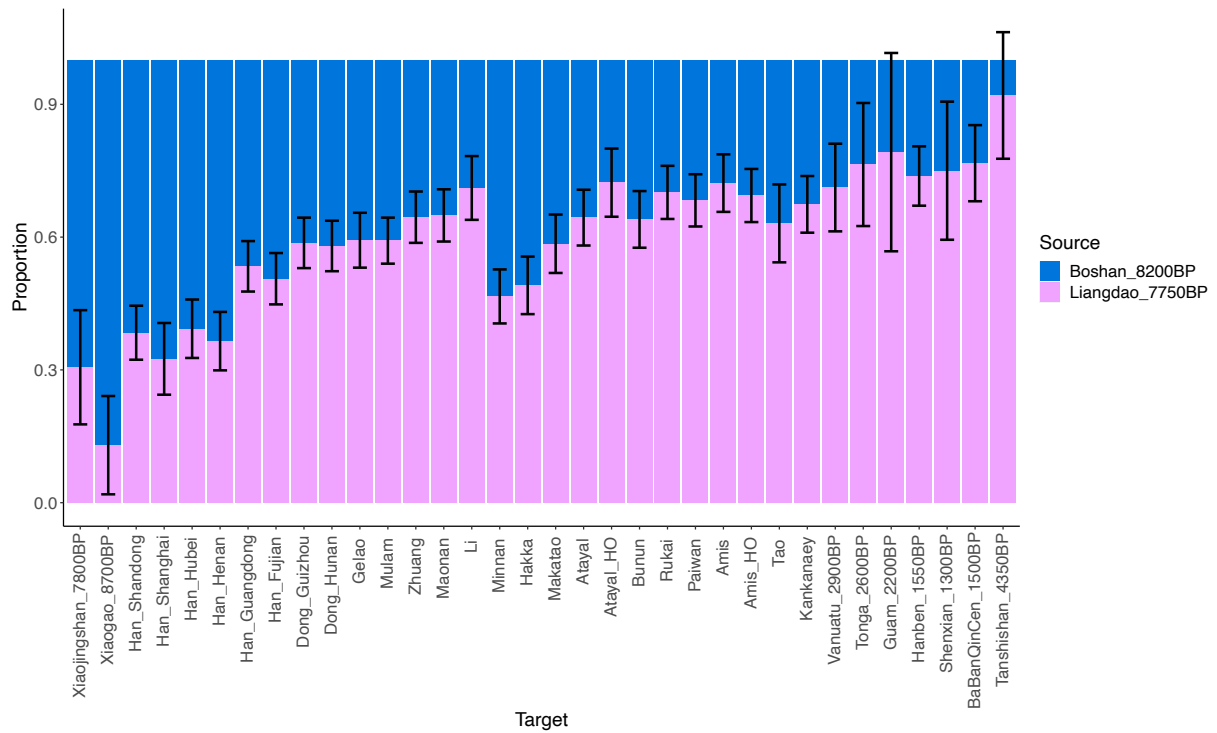

304  
 305  
 306  
 307

**Fig. S9. Bar plot visualization of the qpAdm results.** The error bars indicate the mean +/- one standard error.

score=23.18  
 worst-Z=2.66

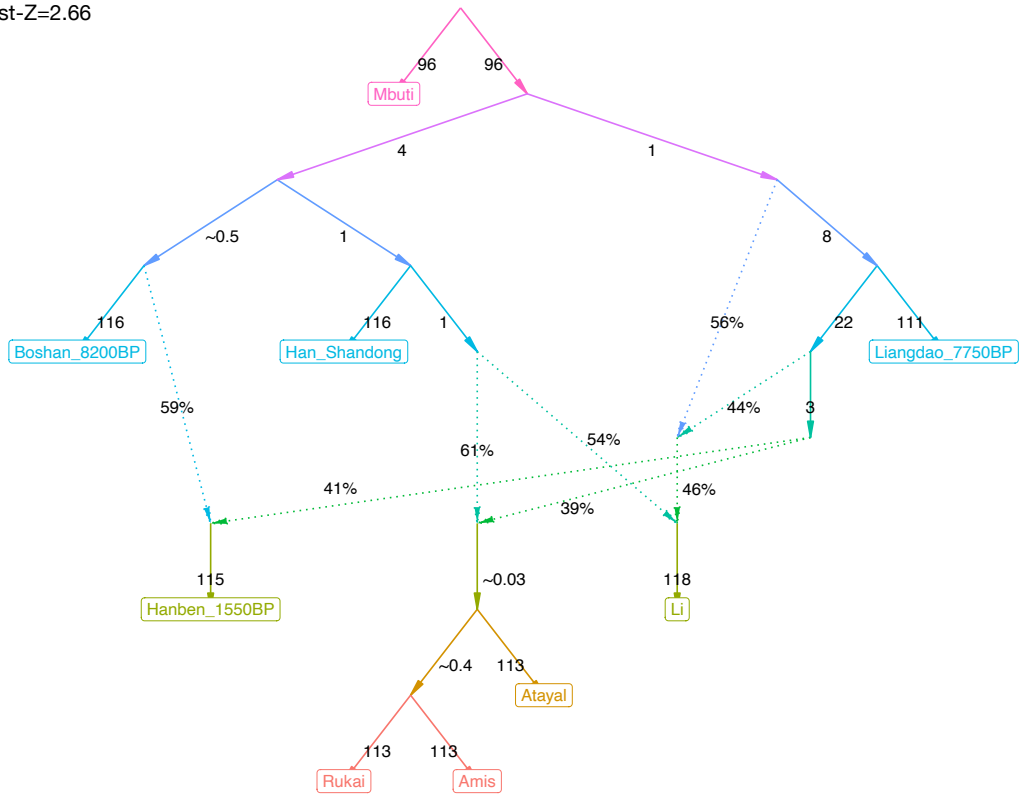

308  
 309  
 310  
 311  
 312

**Fig. S10. Best-fitting admixture graph for the Into-Taiwan events.** The numbers on the solid lines are in genetic drift units while those on the dashed lines indicate ancestry proportions. The ADMIXTOOLS 2 graph score and the worst-fitting Z score are shown on the top-left.

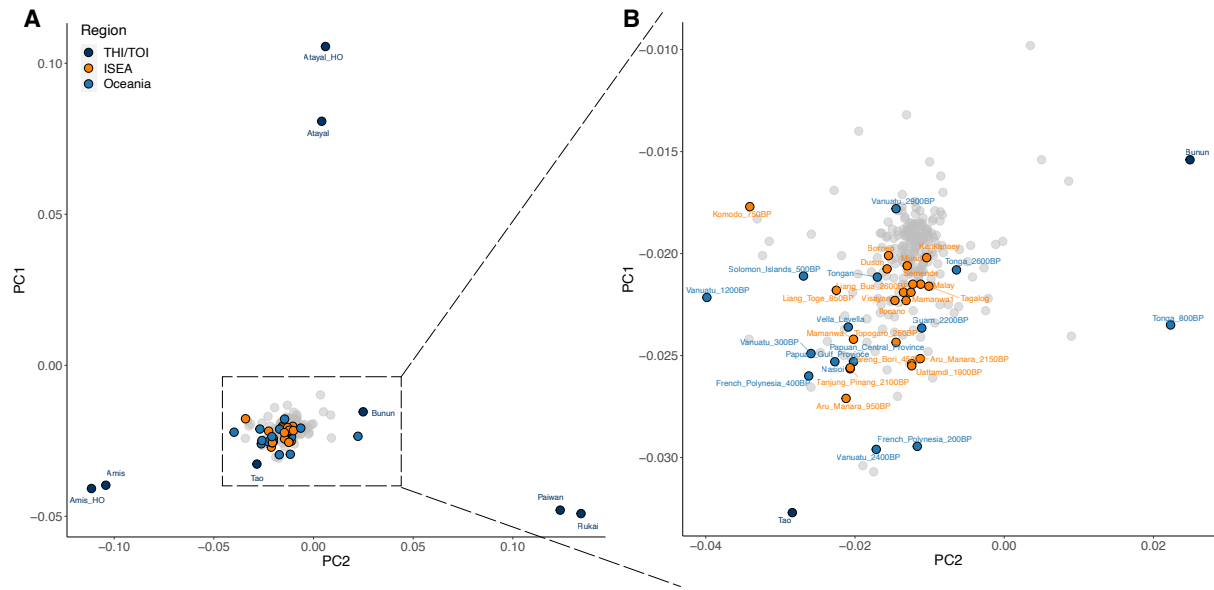

313  
 314  
 315  
 316  
 317  
 318  
 319  
 320

**Fig. S11. THI/TOI PCA with a focus on the projected Austronesian-related ISEA/Oceanian groups.** The PCA was computed using only the THI/TOI groups. (A) the full results and (B) zoom-in of (A) show the projected modern and ancient groups with a focus on the ISEA/Oceanian groups whose individuals have at least 10% Austronesian-related (purple) component in ADMIXTURE K=9 (Fig. 2; Fig. S3). Dots represent the median position of individuals from a group. Our focusing groups are colored by regions while the other projected groups are colored in grey to provide an overall background variation.

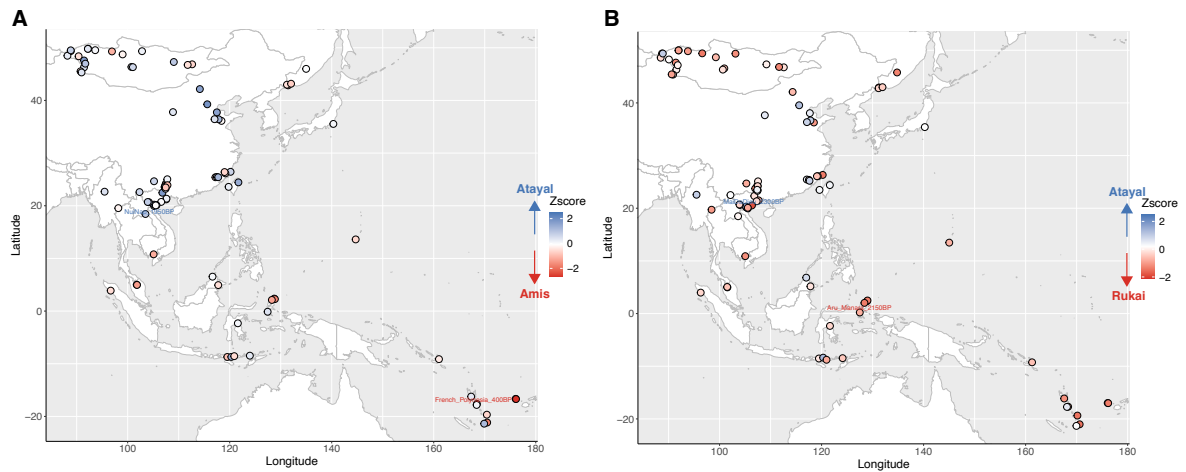

321  
 322  
 323  
 324  
 325  
 326  
 327  
 328  
 329

**Fig. S12. Differential allelic sharing to the ancient groups from East Asia and Oceania between the Atayal and Rukai/Amis using only transversions and the French as an outgroup.** Results of the form  $f_4(\text{Atayal}, X; \text{ancient groups from East Asia and Oceania}, \text{French})$  where X is Amis (A) / Rukai (B). The ancient groups are plotted as dots on the map, colored in proportion to Z score. Positive values (in blue) indicate more sharing with the Atayal while negative values (in red) indicate more sharing with the Amis/Rukai. Significant values (absolute Z score value  $\geq 2$ ) are further labelled with the population name.

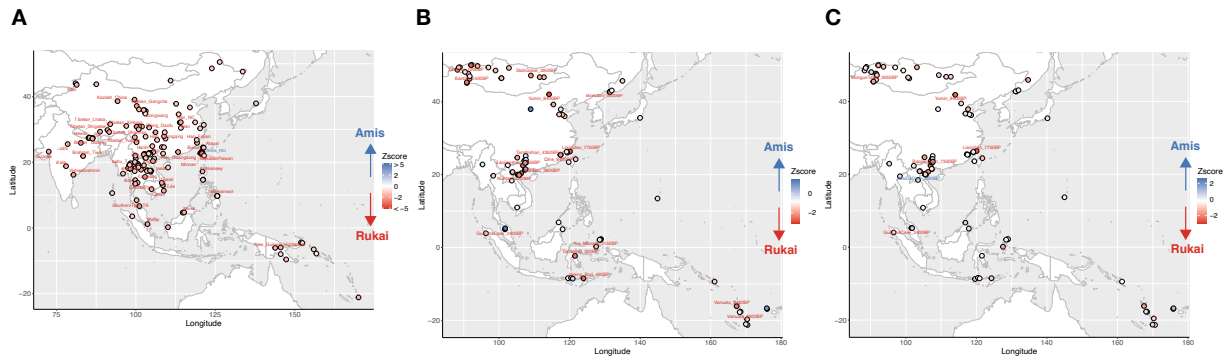

330  
 331 **Fig. S13. Differential allelic sharing to the modern/ancient groups from East Asia and Oceania**  
 332 **between the Atayal and Rukai/Amis.** Results of the form  $f_4(\text{Amis, Rukai; Y, Mbuti})$  where Y are  
 333 modern (A) / ancient (B) groups from East Asia and Oceania. Additional tests (C) are results of the form  
 334  $f_4(\text{Amis, Rukai; ancient groups, French})$  using only transversions, which reduces false positives caused  
 335 by DNA damage and/or attraction to deep outgroups but also the statistical power due to the decreased  
 336 number of SNPs. The modern/ancient groups are plotted as dots on the map, colored in proportion to  
 337 Z score. Positive values (in blue) indicate more sharing with the Amis while negative values (in red)  
 338 indicate more sharing with the Rukai. Significant values (absolute Z score value  $\geq 2$ ) are labelled with  
 339 the population name.  
 340

score=28.95  
worst-Z=2.86

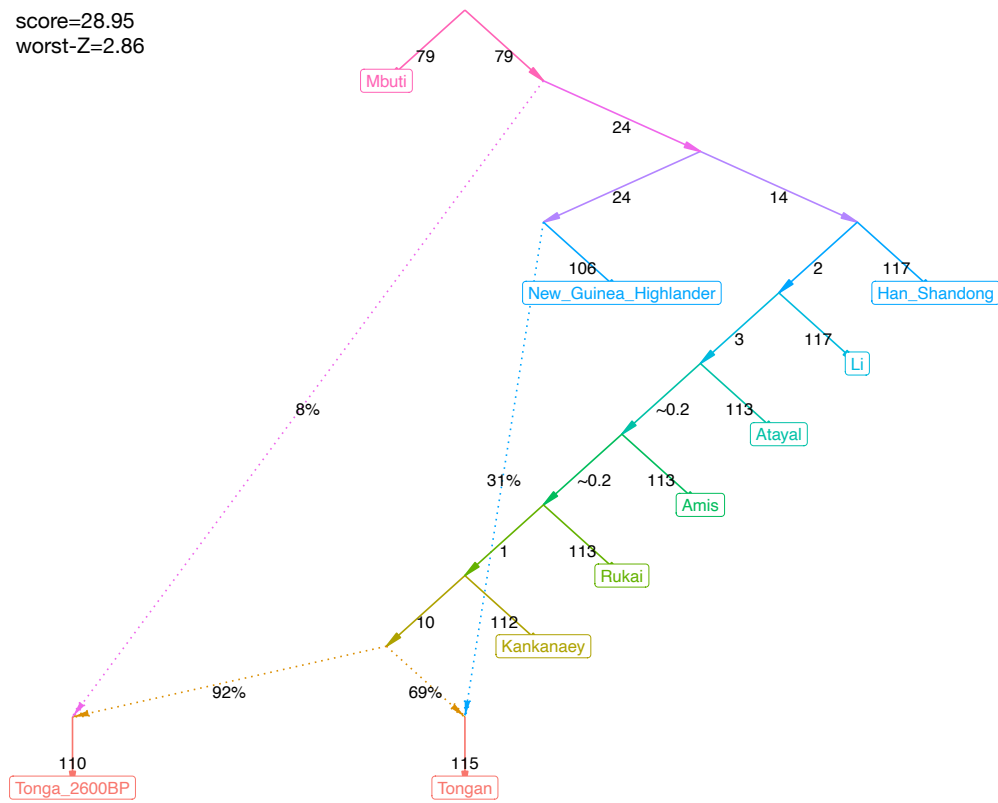

341  
342  
343  
344  
345

**Fig. S14. Best-fitting admixture graph for the Out-of-Taiwan events.** The numbers on the solid lines are in genetic drift units while those on the dashed lines indicate the ancestry proportions. The ADMIXTOOLS 2 graph score and the worst-fitting Z score are shown on the top-left.

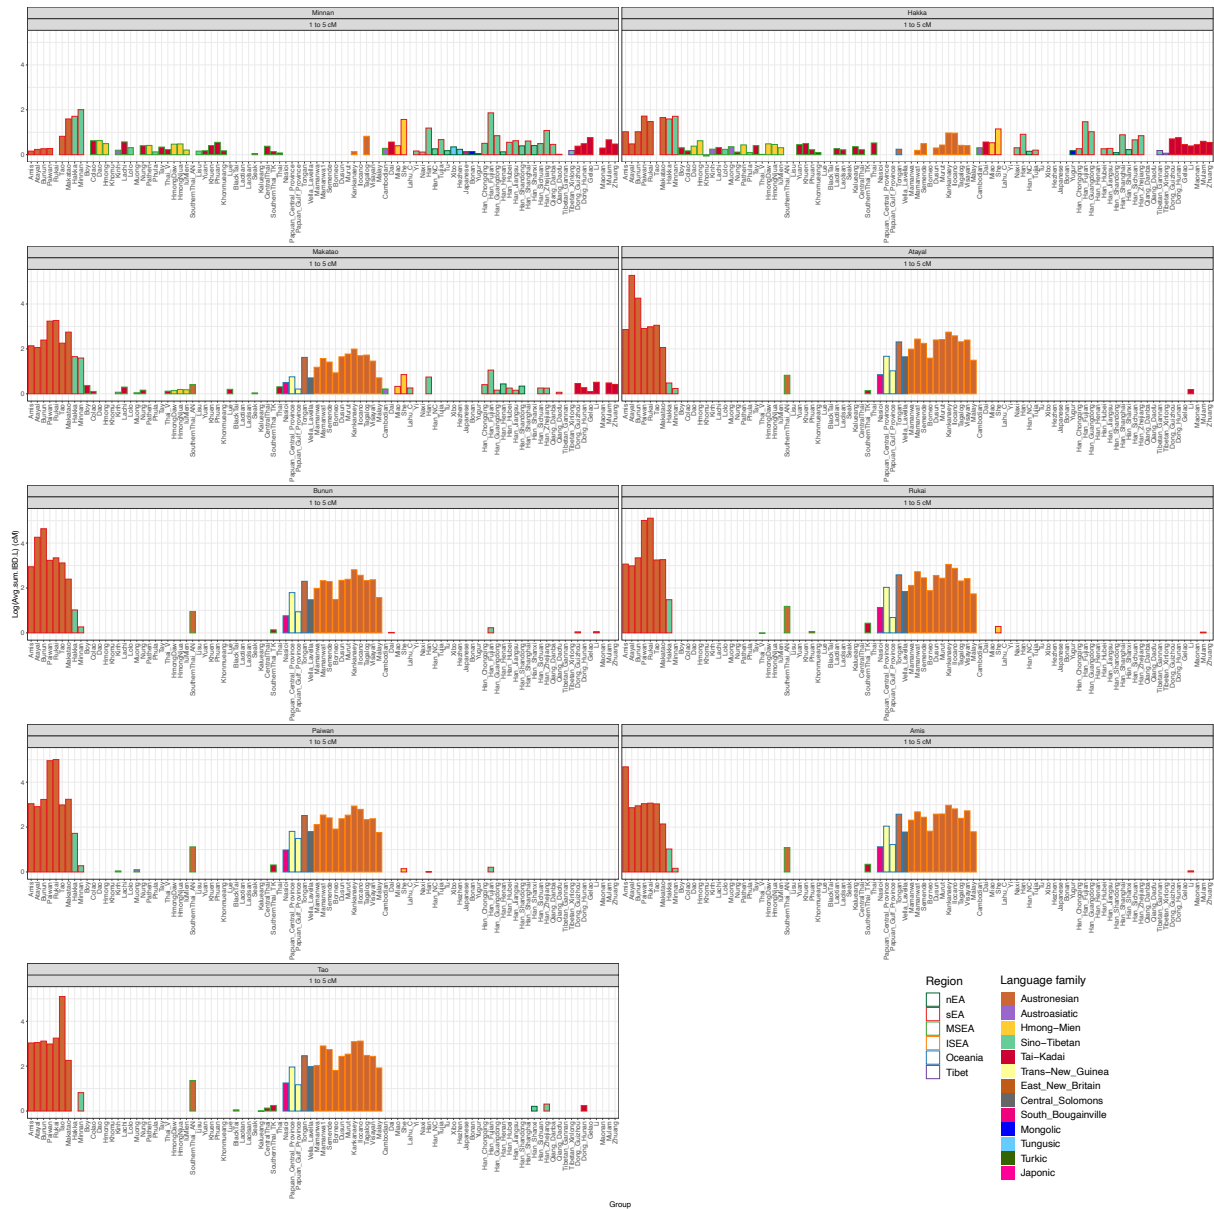

346  
 347  
 348  
 349  
 350  
 351  
 352  
 353

**Fig. S15. Quantification of all IBD sharing between each Taiwanese group and East Asian (including other Taiwanese) and Oceanian groups in segment size range of 1 to 5 cM. The average summed IBD length between the Taiwanese groups (in rows) and other East Asian and Oceanian groups is depicted in the bar plots; filled bars are colored according to the languages spoken by the compared East Asian/Oceanian groups shown on the x-axis while the outline color of the empty bars indicates their regions.**



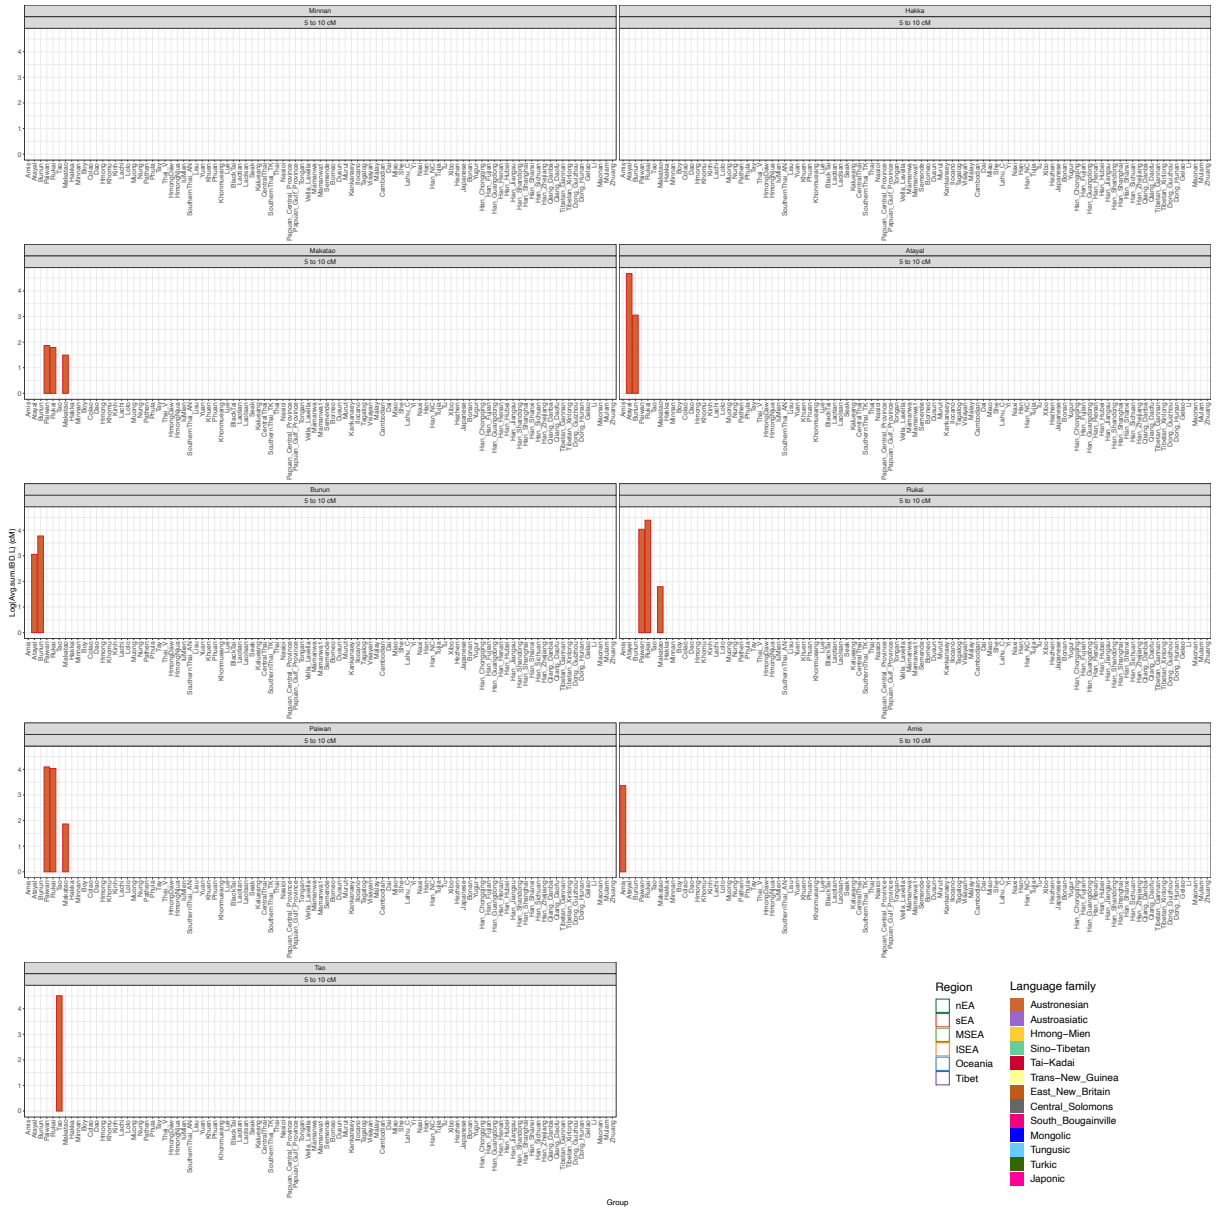

354  
 355  
 356  
 357  
 358  
 359  
 360  
 361

**Fig. S16. Quantification of all IBD sharing between each Taiwanese group and East Asian (including other Taiwanese) and Oceanian groups in segment size range of 5 to 10 cM. The average summed IBD length between the Taiwanese groups (in rows) and other East Asian and Oceanian groups is depicted in the bar plots; filled bars are colored according to the languages spoken by the compared East Asian/Oceanian groups shown on the x-axis while the outline color of the empty bars indicates their regions.**

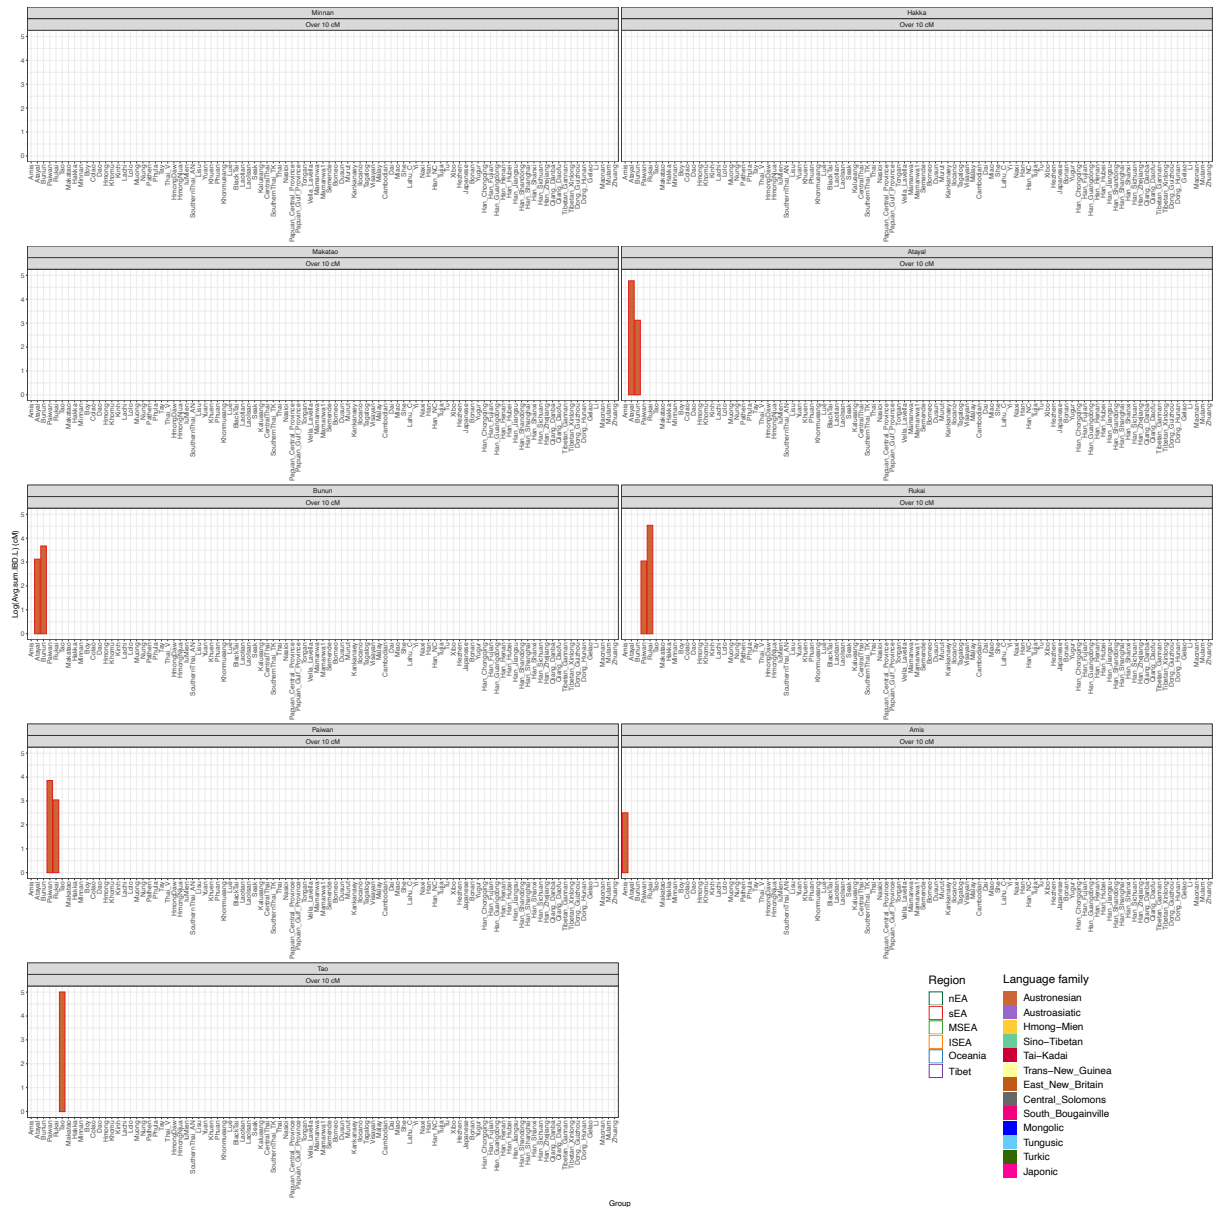

362  
 363  
 364  
 365  
 366  
 367  
 368  
 369

**Fig. S17. Quantification of all IBD sharing between each Taiwanese group and East Asian (including other Taiwanese) and Oceanian groups in segment size range of over 10 cM. The average summed IBD length between the Taiwanese groups (in rows) and other East Asian and Oceanian groups is depicted in the bar plots; filled bars are colored according to the languages spoken by the compared East Asian/Oceanian groups shown on the x-axis while the outline color of the empty bars indicates their regions.**

370 **Supplementary Tables**

371

372 **Table.S1. Metadata of the individuals in this study.** In the column “Region”, sEA is southern East  
 373 Asia, nEA is northern East Asia, MSEA is Mainland Southeast Asia, and ISEA is Island Southeast Asia.  
 374 The column “CP\_Group” shows the group used for the grouping in the ChromoPainter analyses. In the  
 375 column “QC”, imiss stands for missingness per individual, kin stands for 1st degree kinship, and ancient  
 376 individuals only used in qpAdm as outgroups are noted.  
 377

| Individual_ID | Population | Region | Country | Type   | Age | Language     | Latitude | Longitude | CP_Group | TW_Group  | Reference  | QC    |
|---------------|------------|--------|---------|--------|-----|--------------|----------|-----------|----------|-----------|------------|-------|
| TA199         | Amis       | sEA    | Taiwan  | modern | 0   | Austronesian | 22.84    | 121.19    | Amis     | TW_S      | This_study | PASS  |
| TA29          | Amis       | sEA    | Taiwan  | modern | 0   | Austronesian | 22.84    | 121.19    | Amis     | TW_S      | This_study | PASS  |
| TA245         | Amis       | sEA    | Taiwan  | modern | 0   | Austronesian | 22.84    | 121.19    | Amis     | TW_S      | This_study | PASS  |
| TA81          | Amis       | sEA    | Taiwan  | modern | 0   | Austronesian | 22.84    | 121.19    | Amis     | TW_S      | This_study | PASS  |
| TA258         | Amis       | sEA    | Taiwan  | modern | 0   | Austronesian | 22.84    | 121.19    | Amis     | TW_S      | This_study | PASS  |
| TA95          | Amis       | sEA    | Taiwan  | modern | 0   | Austronesian | 22.84    | 121.19    | Amis     | TW_S      | This_study | PASS  |
| TA101         | Amis       | sEA    | Taiwan  | modern | 0   | Austronesian | 22.84    | 121.19    | Amis     | TW_S      | This_study | PASS  |
| TA131         | Amis       | sEA    | Taiwan  | modern | 0   | Austronesian | 22.84    | 121.19    | Amis     | TW_S      | This_study | PASS  |
| TA138         | Amis       | sEA    | Taiwan  | modern | 0   | Austronesian | 22.84    | 121.19    | Amis     | TW_S      | This_study | PASS  |
| ata34         | Atayal     | sEA    | Taiwan  | modern | 0   | Austronesian | 24.61    | 121.3     | Atayal   | TW_N      | This_study | PASS  |
| ata46         | Atayal     | sEA    | Taiwan  | modern | 0   | Austronesian | 24.61    | 121.3     | Atayal   | TW_N      | This_study | PASS  |
| ata30         | Atayal     | sEA    | Taiwan  | modern | 0   | Austronesian | 24.61    | 121.3     | Atayal   | TW_N      | This_study | PASS  |
| ata141        | Atayal     | sEA    | Taiwan  | modern | 0   | Austronesian | 24.61    | 121.3     | Atayal   | TW_N      | This_study | PASS  |
| ata10         | Atayal     | sEA    | Taiwan  | modern | 0   | Austronesian | 24.61    | 121.3     | Atayal   | TW_N      | This_study | PASS  |
| ata4          | Atayal     | sEA    | Taiwan  | modern | 0   | Austronesian | 24.61    | 121.3     | Atayal   | TW_N      | This_study | PASS  |
| ata1          | Atayal     | sEA    | Taiwan  | modern | 0   | Austronesian | 24.61    | 121.3     | Atayal   | TW_N      | This_study | PASS  |
| bun55         | Bunun      | sEA    | Taiwan  | modern | 0   | Austronesian | 23.21    | 120.7     | Bunun    | TW_C      | This_study | PASS  |
| bun34         | Bunun      | sEA    | Taiwan  | modern | 0   | Austronesian | 23.21    | 120.7     | Bunun    | TW_C      | This_study | PASS  |
| bun32         | Bunun      | sEA    | Taiwan  | modern | 0   | Austronesian | 23.21    | 120.7     | Bunun    | TW_C      | This_study | PASS  |
| bun38         | Bunun      | sEA    | Taiwan  | modern | 0   | Austronesian | 23.21    | 120.7     | Bunun    | TW_C      | This_study | PASS  |
| bun30         | Bunun      | sEA    | Taiwan  | modern | 0   | Austronesian | 23.21    | 120.7     | Bunun    | TW_C      | This_study | PASS  |
| bun39         | Bunun      | sEA    | Taiwan  | modern | 0   | Austronesian | 23.21    | 120.7     | Bunun    | TW_C      | This_study | PASS  |
| bun48         | Bunun      | sEA    | Taiwan  | modern | 0   | Austronesian | 23.21    | 120.7     | Bunun    | TW_C      | This_study | PASS  |
| pai10         | Paiwan     | sEA    | Taiwan  | modern | 0   | Austronesian | 22.68    | 120.69    | Paiwan   | TW_S      | This_study | PASS  |
| pai3          | Paiwan     | sEA    | Taiwan  | modern | 0   | Austronesian | 22.68    | 120.69    | Paiwan   | TW_S      | This_study | PASS  |
| pai58         | Paiwan     | sEA    | Taiwan  | modern | 0   | Austronesian | 22.68    | 120.69    | Paiwan   | TW_S      | This_study | PASS  |
| pai20         | Paiwan     | sEA    | Taiwan  | modern | 0   | Austronesian | 22.68    | 120.69    | Paiwan   | TW_S      | This_study | PASS  |
| pai103        | Paiwan     | sEA    | Taiwan  | modern | 0   | Austronesian | 22.68    | 120.69    | Paiwan   | TW_S      | This_study | PASS  |
| pai55         | Paiwan     | sEA    | Taiwan  | modern | 0   | Austronesian | 22.68    | 120.69    | Paiwan   | TW_S      | This_study | PASS  |
| pai25         | Paiwan     | sEA    | Taiwan  | modern | 0   | Austronesian | 22.68    | 120.69    | Paiwan   | TW_S      | This_study | imiss |
| ruk487        | Rukai      | sEA    | Taiwan  | modern | 0   | Austronesian | 22.7     | 120.61    | Rukai    | TW_S      | This_study | PASS  |
| ruk540        | Rukai      | sEA    | Taiwan  | modern | 0   | Austronesian | 22.7     | 120.61    | Rukai    | TW_S      | This_study | PASS  |
| ruk111        | Rukai      | sEA    | Taiwan  | modern | 0   | Austronesian | 22.7     | 120.61    | Rukai    | TW_S      | This_study | PASS  |
| ruk502        | Rukai      | sEA    | Taiwan  | modern | 0   | Austronesian | 22.7     | 120.61    | Rukai    | TW_S      | This_study | PASS  |
| ruk538        | Rukai      | sEA    | Taiwan  | modern | 0   | Austronesian | 22.7     | 120.61    | Rukai    | TW_S      | This_study | PASS  |
| ruk499        | Rukai      | sEA    | Taiwan  | modern | 0   | Austronesian | 22.7     | 120.61    | Rukai    | TW_S      | This_study | PASS  |
| ruk535        | Rukai      | sEA    | Taiwan  | modern | 0   | Austronesian | 22.7     | 120.61    | Rukai    | TW_S      | This_study | PASS  |
| tao45         | Tao        | sEA    | Taiwan  | modern | 0   | Austronesian | 22.03    | 121.55    | Tao      | TW_Orchid | This_study | PASS  |

|          |         |      |         |        |   |              |       |        |         |            |                |      |
|----------|---------|------|---------|--------|---|--------------|-------|--------|---------|------------|----------------|------|
| pin33    | Makatao | sEA  | Taiwan  | modern | 0 | Austronesian | 22.6  | 120.61 | Makatao | TW_Lowland | This_study     | PASS |
| pin29    | Makatao | sEA  | Taiwan  | modern | 0 | Austronesian | 22.6  | 120.61 | Makatao | TW_Lowland | This_study     | PASS |
| pin74    | Makatao | sEA  | Taiwan  | modern | 0 | Austronesian | 22.6  | 120.61 | Makatao | TW_Lowland | This_study     | PASS |
| pin126   | Makatao | sEA  | Taiwan  | modern | 0 | Austronesian | 22.6  | 120.61 | Makatao | TW_Lowland | This_study     | PASS |
| pin81    | Makatao | sEA  | Taiwan  | modern | 0 | Austronesian | 22.6  | 120.61 | Makatao | TW_Lowland | This_study     | PASS |
| hak95    | Hakka   | sEA  | Taiwan  | modern | 0 | Sino-Tibetan | 22.67 | 120.6  | Hakka   | TW_Han     | This_study     | PASS |
| hak19    | Hakka   | sEA  | Taiwan  | modern | 0 | Sino-Tibetan | 22.67 | 120.6  | Hakka   | TW_Han     | This_study     | PASS |
| hak13    | Hakka   | sEA  | Taiwan  | modern | 0 | Sino-Tibetan | 22.67 | 120.6  | Hakka   | TW_Han     | This_study     | PASS |
| hak23    | Hakka   | sEA  | Taiwan  | modern | 0 | Sino-Tibetan | 22.67 | 120.6  | Hakka   | TW_Han     | This_study     | PASS |
| hak33    | Hakka   | sEA  | Taiwan  | modern | 0 | Sino-Tibetan | 22.67 | 120.6  | Hakka   | TW_Han     | This_study     | PASS |
| hak36    | Hakka   | sEA  | Taiwan  | modern | 0 | Sino-Tibetan | 22.67 | 120.6  | Hakka   | TW_Han     | This_study     | PASS |
| min186   | Minnan  | sEA  | Taiwan  | modern | 0 | Sino-Tibetan | 22.63 | 120.31 | Minnan  | TW_Han     | This_study     | PASS |
| min235   | Minnan  | sEA  | Taiwan  | modern | 0 | Sino-Tibetan | 22.63 | 120.31 | Minnan  | TW_Han     | This_study     | PASS |
| min396   | Minnan  | sEA  | Taiwan  | modern | 0 | Sino-Tibetan | 22.63 | 120.31 | Minnan  | TW_Han     | This_study     | PASS |
| min305   | Minnan  | sEA  | Taiwan  | modern | 0 | Sino-Tibetan | 22.63 | 120.31 | Minnan  | TW_Han     | This_study     | PASS |
| min321   | Minnan  | sEA  | Taiwan  | modern | 0 | Sino-Tibetan | 22.63 | 120.31 | Minnan  | TW_Han     | This_study     | PASS |
| min76    | Minnan  | sEA  | Taiwan  | modern | 0 | Sino-Tibetan | 22.63 | 120.31 | Minnan  | TW_Han     | This_study     | PASS |
| BoY180   | Boy     | MSEA | Vietnam | modern | 0 | Tai-Kadai    | 22.7  | 104.1  | Boy     | N.A.       | Liu_et_al_2020 | PASS |
| BoY181   | Boy     | MSEA | Vietnam | modern | 0 | Tai-Kadai    | 22.7  | 104.1  | Boy     | N.A.       | Liu_et_al_2020 | kin  |
| BoY182   | Boy     | MSEA | Vietnam | modern | 0 | Tai-Kadai    | 22.7  | 104.1  | Boy     | N.A.       | Liu_et_al_2020 | PASS |
| BoY184   | Boy     | MSEA | Vietnam | modern | 0 | Tai-Kadai    | 22.7  | 104.1  | Boy     | N.A.       | Liu_et_al_2020 | PASS |
| BoY185   | Boy     | MSEA | Vietnam | modern | 0 | Tai-Kadai    | 22.7  | 104.1  | Boy     | N.A.       | Liu_et_al_2020 | PASS |
| BoY186   | Boy     | MSEA | Vietnam | modern | 0 | Tai-Kadai    | 22.7  | 104.1  | Boy     | N.A.       | Liu_et_al_2020 | kin  |
| BoY188   | Boy     | MSEA | Vietnam | modern | 0 | Tai-Kadai    | 22.7  | 104.1  | Boy     | N.A.       | Liu_et_al_2020 | kin  |
| BoY189   | Boy     | MSEA | Vietnam | modern | 0 | Tai-Kadai    | 22.7  | 104.1  | Boy     | N.A.       | Liu_et_al_2020 | PASS |
| BoY190   | Boy     | MSEA | Vietnam | modern | 0 | Tai-Kadai    | 22.7  | 104.1  | Boy     | N.A.       | Liu_et_al_2020 | PASS |
| BoY191   | Boy     | MSEA | Vietnam | modern | 0 | Tai-Kadai    | 22.7  | 104.1  | Boy     | N.A.       | Liu_et_al_2020 | kin  |
| BoY192_2 | Boy     | MSEA | Vietnam | modern | 0 | Tai-Kadai    | 22.7  | 104.1  | Boy     | N.A.       | Liu_et_al_2020 | kin  |
| BoY193_2 | Boy     | MSEA | Vietnam | modern | 0 | Tai-Kadai    | 22.7  | 104.1  | Boy     | N.A.       | Liu_et_al_2020 | kin  |
| Cham58   | Cham    | MSEA | Vietnam | modern | 0 | Austronesian | 11.5  | 108.9  | Cham    | N.A.       | Liu_et_al_2020 | PASS |
| Cham64   | Cham    | MSEA | Vietnam | modern | 0 | Austronesian | 11.5  | 108.9  | Cham    | N.A.       | Liu_et_al_2020 | PASS |
| Cham66   | Cham    | MSEA | Vietnam | modern | 0 | Austronesian | 11.5  | 108.9  | Cham    | N.A.       | Liu_et_al_2020 | PASS |
| Cham75   | Cham    | MSEA | Vietnam | modern | 0 | Austronesian | 11.5  | 108.9  | Cham    | N.A.       | Liu_et_al_2020 | PASS |
| Cham80   | Cham    | MSEA | Vietnam | modern | 0 | Austronesian | 11.5  | 108.9  | Cham    | N.A.       | Liu_et_al_2020 | PASS |
| Cham83   | Cham    | MSEA | Vietnam | modern | 0 | Austronesian | 11.5  | 108.9  | Cham    | N.A.       | Liu_et_al_2020 | PASS |
| Cham89   | Cham    | MSEA | Vietnam | modern | 0 | Austronesian | 11.5  | 108.9  | Cham    | N.A.       | Liu_et_al_2020 | PASS |
| Cham127  | Cham    | MSEA | Vietnam | modern | 0 | Austronesian | 11.5  | 108.9  | Cham    | N.A.       | Liu_et_al_2020 | PASS |
| Cham133  | Cham    | MSEA | Vietnam | modern | 0 | Austronesian | 11.5  | 108.9  | Cham    | N.A.       | Liu_et_al_2020 | PASS |
| Cham137  | Cham    | MSEA | Vietnam | modern | 0 | Austronesian | 11.5  | 108.9  | Cham    | N.A.       | Liu_et_al_2020 | PASS |
| CoLao566 | Colao   | MSEA | Vietnam | modern | 0 | Tai-Kadai    | 22.7  | 104.7  | Colao   | N.A.       | Liu_et_al_2020 | PASS |
| CoLao567 | Colao   | MSEA | Vietnam | modern | 0 | Tai-Kadai    | 22.7  | 104.7  | Colao   | N.A.       | Liu_et_al_2020 | PASS |
| CoLao568 | Colao   | MSEA | Vietnam | modern | 0 | Tai-Kadai    | 22.7  | 104.7  | Colao   | N.A.       | Liu_et_al_2020 | PASS |
| CoLao569 | Colao   | MSEA | Vietnam | modern | 0 | Tai-Kadai    | 22.7  | 104.7  | Colao   | N.A.       | Liu_et_al_2020 | PASS |
| CoLao570 | Colao   | MSEA | Vietnam | modern | 0 | Tai-Kadai    | 22.7  | 104.7  | Colao   | N.A.       | Liu_et_al_2020 | PASS |

|          |        |      |         |        |   |              |      |       |        |      |                |      |
|----------|--------|------|---------|--------|---|--------------|------|-------|--------|------|----------------|------|
| CoLao571 | Colao  | MSEA | Vietnam | modern | 0 | Tai-Kadai    | 22.7 | 104.7 | Colao  | N.A. | Liu_et_al_2020 | PASS |
| CoLao572 | Colao  | MSEA | Vietnam | modern | 0 | Tai-Kadai    | 22.7 | 104.7 | Colao  | N.A. | Liu_et_al_2020 | PASS |
| CoLao573 | Colao  | MSEA | Vietnam | modern | 0 | Tai-Kadai    | 22.7 | 104.7 | Colao  | N.A. | Liu_et_al_2020 | PASS |
| CoLao574 | Colao  | MSEA | Vietnam | modern | 0 | Tai-Kadai    | 22.7 | 104.7 | Colao  | N.A. | Liu_et_al_2020 | PASS |
| CoLao575 | Colao  | MSEA | Vietnam | modern | 0 | Tai-Kadai    | 22.7 | 104.7 | Colao  | N.A. | Liu_et_al_2020 | PASS |
| CoLao576 | Colao  | MSEA | Vietnam | modern | 0 | Tai-Kadai    | 22.7 | 104.7 | Colao  | N.A. | Liu_et_al_2020 | PASS |
| CoLao577 | Colao  | MSEA | Vietnam | modern | 0 | Tai-Kadai    | 22.7 | 104.7 | Colao  | N.A. | Liu_et_al_2020 | PASS |
| Cong410  | Cong   | MSEA | Vietnam | modern | 0 | Sino-Tibetan | 22.4 | 102.7 | Cong   | N.A. | Liu_et_al_2020 | PASS |
| Cong411  | Cong   | MSEA | Vietnam | modern | 0 | Sino-Tibetan | 22.4 | 102.7 | Cong   | N.A. | Liu_et_al_2020 | PASS |
| Cong412  | Cong   | MSEA | Vietnam | modern | 0 | Sino-Tibetan | 22.4 | 102.7 | Cong   | N.A. | Liu_et_al_2020 | kin  |
| Cong413  | Cong   | MSEA | Vietnam | modern | 0 | Sino-Tibetan | 22.4 | 102.7 | Cong   | N.A. | Liu_et_al_2020 | PASS |
| Cong414  | Cong   | MSEA | Vietnam | modern | 0 | Sino-Tibetan | 22.4 | 102.7 | Cong   | N.A. | Liu_et_al_2020 | PASS |
| Cong415  | Cong   | MSEA | Vietnam | modern | 0 | Sino-Tibetan | 22.4 | 102.7 | Cong   | N.A. | Liu_et_al_2020 | PASS |
| Cong416  | Cong   | MSEA | Vietnam | modern | 0 | Sino-Tibetan | 22.4 | 102.7 | Cong   | N.A. | Liu_et_al_2020 | PASS |
| Cong420  | Cong   | MSEA | Vietnam | modern | 0 | Sino-Tibetan | 22.4 | 102.7 | Cong   | N.A. | Liu_et_al_2020 | PASS |
| Cong421  | Cong   | MSEA | Vietnam | modern | 0 | Sino-Tibetan | 22.4 | 102.7 | Cong   | N.A. | Liu_et_al_2020 | PASS |
| Cong423  | Cong   | MSEA | Vietnam | modern | 0 | Sino-Tibetan | 22.4 | 102.7 | Cong   | N.A. | Liu_et_al_2020 | PASS |
| Cong424  | Cong   | MSEA | Vietnam | modern | 0 | Sino-Tibetan | 22.4 | 102.7 | Cong   | N.A. | Liu_et_al_2020 | PASS |
| Cong425  | Cong   | MSEA | Vietnam | modern | 0 | Sino-Tibetan | 22.4 | 102.7 | Cong   | N.A. | Liu_et_al_2020 | PASS |
| Dao50    | Dao    | MSEA | Vietnam | modern | 0 | Hmong-Mien   | 22.7 | 104.7 | N.A.   | N.A. | Liu_et_al_2020 | PASS |
| Dao51    | Dao    | MSEA | Vietnam | modern | 0 | Hmong-Mien   | 22.7 | 104.7 | N.A.   | N.A. | Liu_et_al_2020 | PASS |
| Dao52    | Dao    | MSEA | Vietnam | modern | 0 | Hmong-Mien   | 22.7 | 104.7 | N.A.   | N.A. | Liu_et_al_2020 | PASS |
| Dao623   | Dao    | MSEA | Vietnam | modern | 0 | Hmong-Mien   | 22.7 | 104.7 | N.A.   | N.A. | Liu_et_al_2020 | PASS |
| Dao624_2 | Dao    | MSEA | Vietnam | modern | 0 | Hmong-Mien   | 22.7 | 104.7 | N.A.   | N.A. | Liu_et_al_2020 | PASS |
| Dao625   | Dao    | MSEA | Vietnam | modern | 0 | Hmong-Mien   | 22.7 | 104.7 | N.A.   | N.A. | Liu_et_al_2020 | PASS |
| Dao626   | Dao    | MSEA | Vietnam | modern | 0 | Hmong-Mien   | 22.7 | 104.7 | N.A.   | N.A. | Liu_et_al_2020 | PASS |
| Dao627   | Dao    | MSEA | Vietnam | modern | 0 | Hmong-Mien   | 22.7 | 104.7 | N.A.   | N.A. | Liu_et_al_2020 | PASS |
| Dao629   | Dao    | MSEA | Vietnam | modern | 0 | Hmong-Mien   | 22.7 | 104.7 | N.A.   | N.A. | Liu_et_al_2020 | PASS |
| Dao630   | Dao    | MSEA | Vietnam | modern | 0 | Hmong-Mien   | 22.7 | 104.7 | N.A.   | N.A. | Liu_et_al_2020 | PASS |
| Dao631   | Dao    | MSEA | Vietnam | modern | 0 | Hmong-Mien   | 22.7 | 104.7 | N.A.   | N.A. | Liu_et_al_2020 | PASS |
| Dao632   | Dao    | MSEA | Vietnam | modern | 0 | Hmong-Mien   | 22.7 | 104.7 | N.A.   | N.A. | Liu_et_al_2020 | PASS |
| Ede61    | Ede    | MSEA | Vietnam | modern | 0 | Austronesian | 12.9 | 108.1 | Ede    | N.A. | Liu_et_al_2020 | PASS |
| Ede74    | Ede    | MSEA | Vietnam | modern | 0 | Austronesian | 12.9 | 108.2 | Ede    | N.A. | Liu_et_al_2020 | PASS |
| Ede95    | Ede    | MSEA | Vietnam | modern | 0 | Austronesian | 12.7 | 108.8 | Ede    | N.A. | Liu_et_al_2020 | PASS |
| Ede97    | Ede    | MSEA | Vietnam | modern | 0 | Austronesian | 12.7 | 108   | Ede    | N.A. | Liu_et_al_2020 | PASS |
| Ede102   | Ede    | MSEA | Vietnam | modern | 0 | Austronesian | 13   | 108.4 | Ede    | N.A. | Liu_et_al_2020 | PASS |
| Ede112   | Ede    | MSEA | Vietnam | modern | 0 | Austronesian | 12.9 | 108.9 | Ede    | N.A. | Liu_et_al_2020 | PASS |
| Ede123   | Ede    | MSEA | Vietnam | modern | 0 | Austronesian | 12.9 | 108.2 | Ede    | N.A. | Liu_et_al_2020 | PASS |
| Ede736   | Ede    | MSEA | Vietnam | modern | 0 | Austronesian | 12.8 | 108.6 | Ede    | N.A. | Liu_et_al_2020 | PASS |
| Ede737   | Ede    | MSEA | Vietnam | modern | 0 | Austronesian | 13   | 108.4 | Ede    | N.A. | Liu_et_al_2020 | PASS |
| Ede738   | Ede    | MSEA | Vietnam | modern | 0 | Austronesian | 12.7 | 108.8 | Ede    | N.A. | Liu_et_al_2020 | PASS |
| Ede740   | Ede    | MSEA | Vietnam | modern | 0 | Austronesian | 12.7 | 108.8 | Ede    | N.A. | Liu_et_al_2020 | PASS |
| Giarai60 | Giarai | MSEA | Vietnam | modern | 0 | Austronesian | 13.2 | 108.7 | Giarai | N.A. | Liu_et_al_2020 | PASS |
| Giarai67 | Giarai | MSEA | Vietnam | modern | 0 | Austronesian | 13.3 | 108.4 | Giarai | N.A. | Liu_et_al_2020 | PASS |

|            |        |      |         |        |   |               |      |       |        |      |                |      |
|------------|--------|------|---------|--------|---|---------------|------|-------|--------|------|----------------|------|
| Giarai91   | Giarai | MSEA | Vietnam | modern | 0 | Austronesian  | 13.6 | 108.1 | Giarai | N.A. | Liu_et_al_2020 | PASS |
| Giarai100  | Giarai | MSEA | Vietnam | modern | 0 | Austronesian  | 13.2 | 108.7 | Giarai | N.A. | Liu_et_al_2020 | PASS |
| Giarai107  | Giarai | MSEA | Vietnam | modern | 0 | Austronesian  | 13.3 | 108.4 | Giarai | N.A. | Liu_et_al_2020 | PASS |
| Giarai124  | Giarai | MSEA | Vietnam | modern | 0 | Austronesian  | 13.6 | 107.8 | Giarai | N.A. | Liu_et_al_2020 | PASS |
| Giarai134  | Giarai | MSEA | Vietnam | modern | 0 | Austronesian  | 14.1 | 107.6 | Giarai | N.A. | Liu_et_al_2020 | PASS |
| Giarai716  | Giarai | MSEA | Vietnam | modern | 0 | Austronesian  | 13.8 | 107.7 | Giarai | N.A. | Liu_et_al_2020 | PASS |
| Giarai718  | Giarai | MSEA | Vietnam | modern | 0 | Austronesian  | 14.2 | 108   | Giarai | N.A. | Liu_et_al_2020 | PASS |
| Giarai719  | Giarai | MSEA | Vietnam | modern | 0 | Austronesian  | 14   | 108   | Giarai | N.A. | Liu_et_al_2020 | PASS |
| Giarai722  | Giarai | MSEA | Vietnam | modern | 0 | Austronesian  | 13.3 | 108.4 | Giarai | N.A. | Liu_et_al_2020 | PASS |
| Giarai723  | Giarai | MSEA | Vietnam | modern | 0 | Austronesian  | 13.6 | 107.8 | Giarai | N.A. | Liu_et_al_2020 | PASS |
| HaNhi44    | Hanhi  | MSEA | Vietnam | modern | 0 | Sino-Tibetan  | 22.4 | 102.7 | Hanhi  | N.A. | Liu_et_al_2020 | PASS |
| HaNhi45    | Hanhi  | MSEA | Vietnam | modern | 0 | Sino-Tibetan  | 22.4 | 102.7 | Hanhi  | N.A. | Liu_et_al_2020 | PASS |
| HaNhi46    | Hanhi  | MSEA | Vietnam | modern | 0 | Sino-Tibetan  | 22.4 | 102.7 | Hanhi  | N.A. | Liu_et_al_2020 | PASS |
| HaNhi315   | Hanhi  | MSEA | Vietnam | modern | 0 | Sino-Tibetan  | 22.4 | 102.7 | Hanhi  | N.A. | Liu_et_al_2020 | PASS |
| HaNhi317   | Hanhi  | MSEA | Vietnam | modern | 0 | Sino-Tibetan  | 22.4 | 102.7 | Hanhi  | N.A. | Liu_et_al_2020 | PASS |
| HaNhi319   | Hanhi  | MSEA | Vietnam | modern | 0 | Sino-Tibetan  | 22.4 | 102.7 | Hanhi  | N.A. | Liu_et_al_2020 | PASS |
| HaNhi320   | Hanhi  | MSEA | Vietnam | modern | 0 | Sino-Tibetan  | 22.4 | 102.7 | Hanhi  | N.A. | Liu_et_al_2020 | PASS |
| HaNhi321   | Hanhi  | MSEA | Vietnam | modern | 0 | Sino-Tibetan  | 22.4 | 102.7 | Hanhi  | N.A. | Liu_et_al_2020 | PASS |
| HaNhi322   | Hanhi  | MSEA | Vietnam | modern | 0 | Sino-Tibetan  | 22.4 | 102.7 | Hanhi  | N.A. | Liu_et_al_2020 | kin  |
| HaNhi323_2 | Hanhi  | MSEA | Vietnam | modern | 0 | Sino-Tibetan  | 22.4 | 102.7 | Hanhi  | N.A. | Liu_et_al_2020 | PASS |
| HaNhi328   | Hanhi  | MSEA | Vietnam | modern | 0 | Sino-Tibetan  | 22.4 | 102.7 | Hanhi  | N.A. | Liu_et_al_2020 | PASS |
| HaNhi329   | Hanhi  | MSEA | Vietnam | modern | 0 | Sino-Tibetan  | 22.4 | 102.7 | Hanhi  | N.A. | Liu_et_al_2020 | PASS |
| Hmong194   | Hmong  | MSEA | Vietnam | modern | 0 | Hmong-Mien    | 21.4 | 103   | N.A.   | N.A. | Liu_et_al_2020 | PASS |
| Hmong195   | Hmong  | MSEA | Vietnam | modern | 0 | Hmong-Mien    | 21.4 | 103   | N.A.   | N.A. | Liu_et_al_2020 | PASS |
| Hmong196_2 | Hmong  | MSEA | Vietnam | modern | 0 | Hmong-Mien    | 21.4 | 103   | N.A.   | N.A. | Liu_et_al_2020 | kin  |
| Hmong197_1 | Hmong  | MSEA | Vietnam | modern | 0 | Hmong-Mien    | 21.4 | 103   | N.A.   | N.A. | Liu_et_al_2020 | kin  |
| Hmong198   | Hmong  | MSEA | Vietnam | modern | 0 | Hmong-Mien    | 21.4 | 103   | N.A.   | N.A. | Liu_et_al_2020 | PASS |
| Hmong199   | Hmong  | MSEA | Vietnam | modern | 0 | Hmong-Mien    | 21.4 | 103   | N.A.   | N.A. | Liu_et_al_2020 | PASS |
| Hmong200   | Hmong  | MSEA | Vietnam | modern | 0 | Hmong-Mien    | 21.4 | 103   | N.A.   | N.A. | Liu_et_al_2020 | PASS |
| Hmong201   | Hmong  | MSEA | Vietnam | modern | 0 | Hmong-Mien    | 21.4 | 103   | N.A.   | N.A. | Liu_et_al_2020 | PASS |
| Hmong202   | Hmong  | MSEA | Vietnam | modern | 0 | Hmong-Mien    | 21.4 | 103   | N.A.   | N.A. | Liu_et_al_2020 | kin  |
| Hmong203   | Hmong  | MSEA | Vietnam | modern | 0 | Hmong-Mien    | 21.4 | 103   | N.A.   | N.A. | Liu_et_al_2020 | PASS |
| Hmong204   | Hmong  | MSEA | Vietnam | modern | 0 | Hmong-Mien    | 21.4 | 103   | N.A.   | N.A. | Liu_et_al_2020 | PASS |
| Hmong205   | Hmong  | MSEA | Vietnam | modern | 0 | Hmong-Mien    | 21.4 | 103   | N.A.   | N.A. | Liu_et_al_2020 | PASS |
| KhoMu235   | Khomu  | MSEA | Vietnam | modern | 0 | Austroasiatic | 21.4 | 103   | N.A.   | N.A. | Liu_et_al_2020 | PASS |
| KhoMu236   | Khomu  | MSEA | Vietnam | modern | 0 | Austroasiatic | 21.4 | 103   | N.A.   | N.A. | Liu_et_al_2020 | PASS |
| KhoMu237   | Khomu  | MSEA | Vietnam | modern | 0 | Austroasiatic | 21.4 | 103   | N.A.   | N.A. | Liu_et_al_2020 | PASS |
| KhoMu238   | Khomu  | MSEA | Vietnam | modern | 0 | Austroasiatic | 21.4 | 103   | N.A.   | N.A. | Liu_et_al_2020 | PASS |
| KhoMu239   | Khomu  | MSEA | Vietnam | modern | 0 | Austroasiatic | 21.4 | 103   | N.A.   | N.A. | Liu_et_al_2020 | PASS |
| KhoMu240   | Khomu  | MSEA | Vietnam | modern | 0 | Austroasiatic | 21.4 | 103   | N.A.   | N.A. | Liu_et_al_2020 | PASS |
| KhoMu241   | Khomu  | MSEA | Vietnam | modern | 0 | Austroasiatic | 21.4 | 103   | N.A.   | N.A. | Liu_et_al_2020 | kin  |
| KhoMu242   | Khomu  | MSEA | Vietnam | modern | 0 | Austroasiatic | 21.4 | 103   | N.A.   | N.A. | Liu_et_al_2020 | PASS |
| KhoMu244   | Khomu  | MSEA | Vietnam | modern | 0 | Austroasiatic | 21.4 | 103   | N.A.   | N.A. | Liu_et_al_2020 | kin  |
| KhoMu245_2 | Khomu  | MSEA | Vietnam | modern | 0 | Austroasiatic | 21.4 | 103   | N.A.   | N.A. | Liu_et_al_2020 | PASS |

|          |        |      |         |        |   |               |      |       |       |      |                |      |
|----------|--------|------|---------|--------|---|---------------|------|-------|-------|------|----------------|------|
| KhoMu246 | Khomu  | MSEA | Vietnam | modern | 0 | Austroasiatic | 21.4 | 103   | N.A.  | N.A. | Liu_et_al_2020 | kin  |
| KhoMu247 | Khomu  | MSEA | Vietnam | modern | 0 | Austroasiatic | 21.4 | 103   | N.A.  | N.A. | Liu_et_al_2020 | PASS |
| Kinh01_1 | Kinh   | MSEA | Vietnam | modern | 0 | Austroasiatic | 21.4 | 103   | N.A.  | N.A. | Liu_et_al_2020 | PASS |
| Kinh03   | Kinh   | MSEA | Vietnam | modern | 0 | Austroasiatic | 21.2 | 106   | N.A.  | N.A. | Liu_et_al_2020 | PASS |
| Kinh05   | Kinh   | MSEA | Vietnam | modern | 0 | Austroasiatic | 21   | 105.9 | N.A.  | N.A. | Liu_et_al_2020 | PASS |
| Kinh06   | Kinh   | MSEA | Vietnam | modern | 0 | Austroasiatic | 21   | 105.9 | N.A.  | N.A. | Liu_et_al_2020 | PASS |
| Kinh07   | Kinh   | MSEA | Vietnam | modern | 0 | Austroasiatic | 21   | 105.9 | N.A.  | N.A. | Liu_et_al_2020 | PASS |
| Kinh08   | Kinh   | MSEA | Vietnam | modern | 0 | Austroasiatic | 21   | 105.9 | N.A.  | N.A. | Liu_et_al_2020 | PASS |
| Kinh09   | Kinh   | MSEA | Vietnam | modern | 0 | Austroasiatic | 21   | 105.9 | N.A.  | N.A. | Liu_et_al_2020 | PASS |
| Kinh10   | Kinh   | MSEA | Vietnam | modern | 0 | Austroasiatic | 21   | 105.9 | N.A.  | N.A. | Liu_et_al_2020 | PASS |
| Kinh11_1 | Kinh   | MSEA | Vietnam | modern | 0 | Austroasiatic | 21   | 105.9 | N.A.  | N.A. | Liu_et_al_2020 | PASS |
| Kinh12   | Kinh   | MSEA | Vietnam | modern | 0 | Austroasiatic | 21   | 105.9 | N.A.  | N.A. | Liu_et_al_2020 | PASS |
| Kinh14   | Kinh   | MSEA | Vietnam | modern | 0 | Austroasiatic | 21   | 105.9 | N.A.  | N.A. | Liu_et_al_2020 | PASS |
| Kinh15   | Kinh   | MSEA | Vietnam | modern | 0 | Austroasiatic | 22   | 106.9 | N.A.  | N.A. | Liu_et_al_2020 | PASS |
| LaChi530 | Lachi  | MSEA | Vietnam | modern | 0 | Tai-Kadai     | 22.7 | 104.7 | Lachi | N.A. | Liu_et_al_2020 | PASS |
| LaChi532 | Lachi  | MSEA | Vietnam | modern | 0 | Tai-Kadai     | 22.7 | 104.7 | Lachi | N.A. | Liu_et_al_2020 | PASS |
| LaChi533 | Lachi  | MSEA | Vietnam | modern | 0 | Tai-Kadai     | 22.7 | 104.7 | Lachi | N.A. | Liu_et_al_2020 | PASS |
| LaChi534 | Lachi  | MSEA | Vietnam | modern | 0 | Tai-Kadai     | 22.7 | 104.7 | Lachi | N.A. | Liu_et_al_2020 | PASS |
| LaChi535 | Lachi  | MSEA | Vietnam | modern | 0 | Tai-Kadai     | 22.7 | 104.7 | Lachi | N.A. | Liu_et_al_2020 | PASS |
| LaChi554 | Lachi  | MSEA | Vietnam | modern | 0 | Tai-Kadai     | 22.7 | 104.7 | Lachi | N.A. | Liu_et_al_2020 | PASS |
| LaChi555 | Lachi  | MSEA | Vietnam | modern | 0 | Tai-Kadai     | 22.7 | 104.7 | Lachi | N.A. | Liu_et_al_2020 | PASS |
| LaChi556 | Lachi  | MSEA | Vietnam | modern | 0 | Tai-Kadai     | 22.7 | 104.7 | Lachi | N.A. | Liu_et_al_2020 | PASS |
| LaChi557 | Lachi  | MSEA | Vietnam | modern | 0 | Tai-Kadai     | 22.7 | 104.7 | Lachi | N.A. | Liu_et_al_2020 | PASS |
| LaChi558 | Lachi  | MSEA | Vietnam | modern | 0 | Tai-Kadai     | 22.7 | 104.7 | Lachi | N.A. | Liu_et_al_2020 | PASS |
| LaChi559 | Lachi  | MSEA | Vietnam | modern | 0 | Tai-Kadai     | 22.7 | 104.7 | Lachi | N.A. | Liu_et_al_2020 | PASS |
| LaChi560 | Lachi  | MSEA | Vietnam | modern | 0 | Tai-Kadai     | 22.7 | 104.7 | Lachi | N.A. | Liu_et_al_2020 | PASS |
| LaHu342  | Lahu_V | MSEA | Vietnam | modern | 0 | Sino-Tibetan  | 22.4 | 102.7 | Lahu  | N.A. | Liu_et_al_2020 | PASS |
| LaHu344  | Lahu_V | MSEA | Vietnam | modern | 0 | Sino-Tibetan  | 22.4 | 102.7 | Lahu  | N.A. | Liu_et_al_2020 | PASS |
| LaHu347  | Lahu_V | MSEA | Vietnam | modern | 0 | Sino-Tibetan  | 22.4 | 102.7 | Lahu  | N.A. | Liu_et_al_2020 | PASS |
| LaHu348  | Lahu_V | MSEA | Vietnam | modern | 0 | Sino-Tibetan  | 22.4 | 102.7 | Lahu  | N.A. | Liu_et_al_2020 | PASS |
| LaHu350  | Lahu_V | MSEA | Vietnam | modern | 0 | Sino-Tibetan  | 22.4 | 102.7 | Lahu  | N.A. | Liu_et_al_2020 | PASS |
| LaHu351  | Lahu_V | MSEA | Vietnam | modern | 0 | Sino-Tibetan  | 22.4 | 102.7 | Lahu  | N.A. | Liu_et_al_2020 | PASS |
| LaHu352  | Lahu_V | MSEA | Vietnam | modern | 0 | Sino-Tibetan  | 22.4 | 102.7 | Lahu  | N.A. | Liu_et_al_2020 | kin  |
| LaHu353  | Lahu_V | MSEA | Vietnam | modern | 0 | Sino-Tibetan  | 22.4 | 102.7 | Lahu  | N.A. | Liu_et_al_2020 | kin  |
| LaHu354  | Lahu_V | MSEA | Vietnam | modern | 0 | Sino-Tibetan  | 22.4 | 102.7 | Lahu  | N.A. | Liu_et_al_2020 | kin  |
| LaHu355  | Lahu_V | MSEA | Vietnam | modern | 0 | Sino-Tibetan  | 22.4 | 102.7 | Lahu  | N.A. | Liu_et_al_2020 | PASS |
| LaHu356  | Lahu_V | MSEA | Vietnam | modern | 0 | Sino-Tibetan  | 22.4 | 102.7 | Lahu  | N.A. | Liu_et_al_2020 | PASS |
| LaHu360  | Lahu_V | MSEA | Vietnam | modern | 0 | Sino-Tibetan  | 22.4 | 102.7 | Lahu  | N.A. | Liu_et_al_2020 | kin  |
| LoLo469  | Lolo   | MSEA | Vietnam | modern | 0 | Sino-Tibetan  | 23.1 | 105.4 | Lolo  | N.A. | Liu_et_al_2020 | PASS |
| Lolo470  | Lolo   | MSEA | Vietnam | modern | 0 | Sino-Tibetan  | 23.1 | 105.4 | Lolo  | N.A. | Liu_et_al_2020 | PASS |
| LoLo471  | Lolo   | MSEA | Vietnam | modern | 0 | Sino-Tibetan  | 23.1 | 105.4 | Lolo  | N.A. | Liu_et_al_2020 | PASS |
| LoLo472  | Lolo   | MSEA | Vietnam | modern | 0 | Sino-Tibetan  | 23.1 | 105.4 | Lolo  | N.A. | Liu_et_al_2020 | kin  |
| LoLo473  | Lolo   | MSEA | Vietnam | modern | 0 | Sino-Tibetan  | 23.1 | 105.4 | Lolo  | N.A. | Liu_et_al_2020 | PASS |
| LoLo474  | Lolo   | MSEA | Vietnam | modern | 0 | Sino-Tibetan  | 23.1 | 105.4 | Lolo  | N.A. | Liu_et_al_2020 | PASS |

|           |        |      |         |        |   |               |      |       |      |      |                |      |
|-----------|--------|------|---------|--------|---|---------------|------|-------|------|------|----------------|------|
| LoLo475   | Lolo   | MSEA | Vietnam | modern | 0 | Sino-Tibetan  | 23.1 | 105.4 | Lolo | N.A. | Liu_et_al_2020 | PASS |
| LoLo476   | Lolo   | MSEA | Vietnam | modern | 0 | Sino-Tibetan  | 23.1 | 105.4 | Lolo | N.A. | Liu_et_al_2020 | PASS |
| LoLo477   | Lolo   | MSEA | Vietnam | modern | 0 | Sino-Tibetan  | 23.1 | 105.4 | Lolo | N.A. | Liu_et_al_2020 | kin  |
| LoLo478   | Lolo   | MSEA | Vietnam | modern | 0 | Sino-Tibetan  | 23.1 | 105.4 | Lolo | N.A. | Liu_et_al_2020 | PASS |
| LoLo479   | Lolo   | MSEA | Vietnam | modern | 0 | Sino-Tibetan  | 23.1 | 105.4 | Lolo | N.A. | Liu_et_al_2020 | PASS |
| LoLo480   | Lolo   | MSEA | Vietnam | modern | 0 | Sino-Tibetan  | 23.1 | 105.4 | Lolo | N.A. | Liu_et_al_2020 | PASS |
| Mang273   | Mang   | MSEA | Vietnam | modern | 0 | Austroasiatic | 22.4 | 102.7 | N.A. | N.A. | Liu_et_al_2020 | PASS |
| Mang274   | Mang   | MSEA | Vietnam | modern | 0 | Austroasiatic | 22.4 | 102.7 | N.A. | N.A. | Liu_et_al_2020 | PASS |
| Mang276   | Mang   | MSEA | Vietnam | modern | 0 | Austroasiatic | 22.4 | 102.7 | N.A. | N.A. | Liu_et_al_2020 | PASS |
| Mang278_2 | Mang   | MSEA | Vietnam | modern | 0 | Austroasiatic | 22.4 | 102.7 | N.A. | N.A. | Liu_et_al_2020 | PASS |
| Mang284_1 | Mang   | MSEA | Vietnam | modern | 0 | Austroasiatic | 22.4 | 102.7 | N.A. | N.A. | Liu_et_al_2020 | PASS |
| Mang289   | Mang   | MSEA | Vietnam | modern | 0 | Austroasiatic | 22.4 | 102.7 | N.A. | N.A. | Liu_et_al_2020 | PASS |
| Mang290   | Mang   | MSEA | Vietnam | modern | 0 | Austroasiatic | 22.4 | 102.7 | N.A. | N.A. | Liu_et_al_2020 | PASS |
| Mang291   | Mang   | MSEA | Vietnam | modern | 0 | Austroasiatic | 22.4 | 102.7 | N.A. | N.A. | Liu_et_al_2020 | PASS |
| Mang298   | Mang   | MSEA | Vietnam | modern | 0 | Austroasiatic | 22.4 | 102.7 | N.A. | N.A. | Liu_et_al_2020 | PASS |
| Mang307_1 | Mang   | MSEA | Vietnam | modern | 0 | Austroasiatic | 22.4 | 102.7 | N.A. | N.A. | Liu_et_al_2020 | PASS |
| Mang308   | Mang   | MSEA | Vietnam | modern | 0 | Austroasiatic | 22.4 | 102.7 | N.A. | N.A. | Liu_et_al_2020 | PASS |
| Mang310   | Mang   | MSEA | Vietnam | modern | 0 | Austroasiatic | 22.4 | 102.7 | N.A. | N.A. | Liu_et_al_2020 | kin  |
| Muong35   | Muong  | MSEA | Vietnam | modern | 0 | Austroasiatic | 20.4 | 105.6 | N.A. | N.A. | Liu_et_al_2020 | PASS |
| Muong36   | Muong  | MSEA | Vietnam | modern | 0 | Austroasiatic | 20.4 | 105.6 | N.A. | N.A. | Liu_et_al_2020 | PASS |
| Muong38   | Muong  | MSEA | Vietnam | modern | 0 | Austroasiatic | 20.5 | 105.4 | N.A. | N.A. | Liu_et_al_2020 | PASS |
| Muong39   | Muong  | MSEA | Vietnam | modern | 0 | Austroasiatic | 20.7 | 105.6 | N.A. | N.A. | Liu_et_al_2020 | PASS |
| Muong40   | Muong  | MSEA | Vietnam | modern | 0 | Austroasiatic | 20.9 | 105.5 | N.A. | N.A. | Liu_et_al_2020 | PASS |
| Muong41   | Muong  | MSEA | Vietnam | modern | 0 | Austroasiatic | 20.7 | 105.6 | N.A. | N.A. | Liu_et_al_2020 | PASS |
| Muong42   | Muong  | MSEA | Vietnam | modern | 0 | Austroasiatic | 20.7 | 105.6 | N.A. | N.A. | Liu_et_al_2020 | PASS |
| Muong43   | Muong  | MSEA | Vietnam | modern | 0 | Austroasiatic | 20.5 | 105.4 | N.A. | N.A. | Liu_et_al_2020 | PASS |
| Muong121  | Muong  | MSEA | Vietnam | modern | 0 | Austroasiatic | 20.5 | 105.4 | N.A. | N.A. | Liu_et_al_2020 | PASS |
| Muong132  | Muong  | MSEA | Vietnam | modern | 0 | Austroasiatic | 20.5 | 105.4 | N.A. | N.A. | Liu_et_al_2020 | PASS |
| Nung47    | Nung   | MSEA | Vietnam | modern | 0 | Tai-Kadai     | 22.8 | 105   | Nung | N.A. | Liu_et_al_2020 | PASS |
| Nung48    | Nung   | MSEA | Vietnam | modern | 0 | Tai-Kadai     | 22.8 | 105   | Nung | N.A. | Liu_et_al_2020 | PASS |
| Nung49    | Nung   | MSEA | Vietnam | modern | 0 | Tai-Kadai     | 22.9 | 106.1 | Nung | N.A. | Liu_et_al_2020 | PASS |
| Nung664   | Nung   | MSEA | Vietnam | modern | 0 | Tai-Kadai     | 22.7 | 104.7 | Nung | N.A. | Liu_et_al_2020 | PASS |
| Nung672_1 | Nung   | MSEA | Vietnam | modern | 0 | Tai-Kadai     | 22.7 | 104.7 | Nung | N.A. | Liu_et_al_2020 | PASS |
| Nung674   | Nung   | MSEA | Vietnam | modern | 0 | Tai-Kadai     | 22.7 | 104.7 | Nung | N.A. | Liu_et_al_2020 | PASS |
| Nung677   | Nung   | MSEA | Vietnam | modern | 0 | Tai-Kadai     | 22.7 | 104.7 | Nung | N.A. | Liu_et_al_2020 | PASS |
| Nung678   | Nung   | MSEA | Vietnam | modern | 0 | Tai-Kadai     | 22.7 | 104.7 | Nung | N.A. | Liu_et_al_2020 | PASS |
| Nung680   | Nung   | MSEA | Vietnam | modern | 0 | Tai-Kadai     | 22.7 | 104.7 | Nung | N.A. | Liu_et_al_2020 | PASS |
| Nung681   | Nung   | MSEA | Vietnam | modern | 0 | Tai-Kadai     | 22.7 | 104.7 | Nung | N.A. | Liu_et_al_2020 | PASS |
| Nung687   | Nung   | MSEA | Vietnam | modern | 0 | Tai-Kadai     | 22.7 | 104.7 | Nung | N.A. | Liu_et_al_2020 | PASS |
| Nung691   | Nung   | MSEA | Vietnam | modern | 0 | Tai-Kadai     | 22.7 | 104.7 | Nung | N.A. | Liu_et_al_2020 | PASS |
| PaThen494 | Pathen | MSEA | Vietnam | modern | 0 | Hmong-Mien    | 22.4 | 104.7 | N.A. | N.A. | Liu_et_al_2020 | PASS |
| PaThen495 | Pathen | MSEA | Vietnam | modern | 0 | Hmong-Mien    | 22.4 | 104.7 | N.A. | N.A. | Liu_et_al_2020 | PASS |
| PaThen496 | Pathen | MSEA | Vietnam | modern | 0 | Hmong-Mien    | 22.4 | 104.7 | N.A. | N.A. | Liu_et_al_2020 | PASS |
| PaThen497 | Pathen | MSEA | Vietnam | modern | 0 | Hmong-Mien    | 22.4 | 104.7 | N.A. | N.A. | Liu_et_al_2020 | PASS |







































|        |                          |         |                  |        |   |                  |        |         |         |      |                        |      |
|--------|--------------------------|---------|------------------|--------|---|------------------|--------|---------|---------|------|------------------------|------|
| SH07   | New_Guinea_Highlander    | Oceania | Papua_New_Guinea | modern | 0 | Trans-New_Guinea | -6.15  | 143.66  | N.A.    | N.A. | Qin_and_Stoneking_2015 | PASS |
| NG17   | New_Guinea_Highlander    | Oceania | Papua_New_Guinea | modern | 0 | Trans-New_Guinea | -6.15  | 143.66  | N.A.    | N.A. | Qin_and_Stoneking_2015 | PASS |
| SH08   | New_Guinea_Highlander    | Oceania | Papua_New_Guinea | modern | 0 | Trans-New_Guinea | -6.15  | 143.66  | N.A.    | N.A. | Qin_and_Stoneking_2015 | PASS |
| NG24   | Papuan_Eastern_Highlands | Oceania | Papua_New_Guinea | modern | 0 | Trans-New_Guinea | -6.1   | 145.4   | N.A.    | N.A. | Qin_and_Stoneking_2015 | PASS |
| NG10   | Papuan_Eastern_Highlands | Oceania | Papua_New_Guinea | modern | 0 | Trans-New_Guinea | -6.1   | 145.4   | N.A.    | N.A. | Qin_and_Stoneking_2015 | PASS |
| NG11   | Papuan_Eastern_Highlands | Oceania | Papua_New_Guinea | modern | 0 | Trans-New_Guinea | -6.1   | 145.4   | N.A.    | N.A. | Qin_and_Stoneking_2015 | PASS |
| NG28   | Papuan_Eastern_Highlands | Oceania | Papua_New_Guinea | modern | 0 | Trans-New_Guinea | -6.1   | 145.4   | N.A.    | N.A. | Qin_and_Stoneking_2015 | PASS |
| CP3    | Papuan_Central_Province  | Oceania | Papua_New_Guinea | modern | 0 | Trans-New_Guinea | -9.48  | 147.2   | N.A.    | N.A. | Qin_and_Stoneking_2015 | PASS |
| CP7    | Papuan_Central_Province  | Oceania | Papua_New_Guinea | modern | 0 | Trans-New_Guinea | -9.48  | 147.2   | N.A.    | N.A. | Qin_and_Stoneking_2015 | PASS |
| CP10   | Papuan_Central_Province  | Oceania | Papua_New_Guinea | modern | 0 | Trans-New_Guinea | -9.48  | 147.2   | N.A.    | N.A. | Qin_and_Stoneking_2015 | PASS |
| CP13   | Papuan_Central_Province  | Oceania | Papua_New_Guinea | modern | 0 | Trans-New_Guinea | -9.48  | 147.2   | N.A.    | N.A. | Qin_and_Stoneking_2015 | PASS |
| CP14   | Papuan_Central_Province  | Oceania | Papua_New_Guinea | modern | 0 | Trans-New_Guinea | -9.48  | 147.2   | N.A.    | N.A. | Qin_and_Stoneking_2015 | PASS |
| GP3    | Papuan_Gulf_Province     | Oceania | Papua_New_Guinea | modern | 0 | Trans-New_Guinea | -7.88  | 145.69  | N.A.    | N.A. | Qin_and_Stoneking_2015 | PASS |
| GP4    | Papuan_Gulf_Province     | Oceania | Papua_New_Guinea | modern | 0 | Trans-New_Guinea | -7.88  | 145.69  | N.A.    | N.A. | Qin_and_Stoneking_2015 | PASS |
| GP6    | Papuan_Gulf_Province     | Oceania | Papua_New_Guinea | modern | 0 | Trans-New_Guinea | -7.88  | 145.69  | N.A.    | N.A. | Qin_and_Stoneking_2015 | PASS |
| Y4349  | Tongan                   | Oceania | Kingdom_of_Tonga | modern | 0 | Austronesian     | -21.19 | -175.18 | Tongan  | N.A. | Qin_and_Stoneking_2015 | PASS |
| Y4383  | Tongan                   | Oceania | Kingdom_of_Tonga | modern | 0 | Austronesian     | -21.19 | -175.18 | Tongan  | N.A. | Qin_and_Stoneking_2015 | PASS |
| Y4914  | Tongan                   | Oceania | Kingdom_of_Tonga | modern | 0 | Austronesian     | -21.19 | -175.18 | Tongan  | N.A. | Qin_and_Stoneking_2015 | PASS |
| Y6254  | Tongan                   | Oceania | Kingdom_of_Tonga | modern | 0 | Austronesian     | -21.19 | -175.18 | Tongan  | N.A. | Qin_and_Stoneking_2015 | PASS |
| Y5707  | Tongan                   | Oceania | Kingdom_of_Tonga | modern | 0 | Austronesian     | -21.19 | -175.18 | Tongan  | N.A. | Qin_and_Stoneking_2015 | PASS |
| Y5718  | Tongan                   | Oceania | Kingdom_of_Tonga | modern | 0 | Austronesian     | -21.19 | -175.18 | Tongan  | N.A. | Qin_and_Stoneking_2015 | PASS |
| VL43   | Vella_Lavella            | Oceania | Solomon_Islands  | modern | 0 | Central_Solomons | -7.9   | 156.7   | N.A.    | N.A. | Qin_and_Stoneking_2015 | PASS |
| KO39   | Vella_Lavella            | Oceania | Solomon_Islands  | modern | 0 | Central_Solomons | -7.9   | 156.7   | N.A.    | N.A. | Qin_and_Stoneking_2015 | PASS |
| VL02   | Vella_Lavella            | Oceania | Solomon_Islands  | modern | 0 | Central_Solomons | -7.9   | 156.7   | N.A.    | N.A. | Qin_and_Stoneking_2015 | PASS |
| VL08   | Vella_Lavella            | Oceania | Solomon_Islands  | modern | 0 | Central_Solomons | -7.9   | 156.7   | N.A.    | N.A. | Qin_and_Stoneking_2015 | PASS |
| VL09   | Vella_Lavella            | Oceania | Solomon_Islands  | modern | 0 | Central_Solomons | -7.9   | 156.7   | N.A.    | N.A. | Qin_and_Stoneking_2015 | PASS |
| VL11   | Vella_Lavella            | Oceania | Solomon_Islands  | modern | 0 | Central_Solomons | -7.9   | 156.7   | N.A.    | N.A. | Qin_and_Stoneking_2015 | PASS |
| PH10_1 | Mamanwa                  | ISEA    | Philippines      | modern | 0 | Austronesian     | 9.76   | 125.51  | Mamanwa | N.A. | Qin_and_Stoneking_2015 | PASS |
| PH65_1 | Mamanwa                  | ISEA    | Philippines      | modern | 0 | Austronesian     | 9.76   | 125.51  | Mamanwa | N.A. | Qin_and_Stoneking_2015 | PASS |
| PH2    | Mamanwa                  | ISEA    | Philippines      | modern | 0 | Austronesian     | 9.76   | 125.51  | Mamanwa | N.A. | Qin_and_Stoneking_2015 | PASS |
| PH35_1 | Mamanwa                  | ISEA    | Philippines      | modern | 0 | Austronesian     | 9.76   | 125.51  | Mamanwa | N.A. | Qin_and_Stoneking_2015 | PASS |
| PH38_1 | Mamanwa                  | ISEA    | Philippines      | modern | 0 | Austronesian     | 9.76   | 125.51  | Mamanwa | N.A. | Qin_and_Stoneking_2015 | PASS |
| PH4    | Mamanwa                  | ISEA    | Philippines      | modern | 0 | Austronesian     | 9.76   | 125.51  | Mamanwa | N.A. | Qin_and_Stoneking_2015 | PASS |
| PH45_1 | Mamanwa                  | ISEA    | Philippines      | modern | 0 | Austronesian     | 9.76   | 125.51  | Mamanwa | N.A. | Qin_and_Stoneking_2015 | PASS |
| PH66_2 | Mamanwa                  | ISEA    | Philippines      | modern | 0 | Austronesian     | 9.76   | 125.51  | Mamanwa | N.A. | Qin_and_Stoneking_2015 | PASS |
| PH67_2 | Mamanwa                  | ISEA    | Philippines      | modern | 0 | Austronesian     | 9.76   | 125.51  | Mamanwa | N.A. | Qin_and_Stoneking_2015 | PASS |
| PH72_3 | Mamanwa                  | ISEA    | Philippines      | modern | 0 | Austronesian     | 9.76   | 125.51  | Mamanwa | N.A. | Qin_and_Stoneking_2015 | PASS |
| PH77_1 | Mamanwa                  | ISEA    | Philippines      | modern | 0 | Austronesian     | 9.76   | 125.51  | Mamanwa | N.A. | Qin_and_Stoneking_2015 | PASS |
| PH8    | Mamanwa                  | ISEA    | Philippines      | modern | 0 | Austronesian     | 9.76   | 125.51  | Mamanwa | N.A. | Qin_and_Stoneking_2015 | PASS |
| PH9    | Mamanwa                  | ISEA    | Philippines      | modern | 0 | Austronesian     | 9.76   | 125.51  | Mamanwa | N.A. | Qin_and_Stoneking_2015 | PASS |
| PH50_1 | Mamanwa1                 | ISEA    | Philippines      | modern | 0 | Austronesian     | 9.76   | 125.51  | Mamanwa | N.A. | Qin_and_Stoneking_2015 | PASS |
| PH52_3 | Mamanwa1                 | ISEA    | Philippines      | modern | 0 | Austronesian     | 9.76   | 125.51  | Mamanwa | N.A. | Qin_and_Stoneking_2015 | PASS |

|         |          |      |             |        |   |              |       |        |         |      |                        |      |
|---------|----------|------|-------------|--------|---|--------------|-------|--------|---------|------|------------------------|------|
| PH53_1  | Mamanwa1 | ISEA | Philippines | modern | 0 | Austronesian | 9.76  | 125.51 | Mamanwa | N.A. | Qin_and_Stoneking_2015 | PASS |
| PH55_2  | Mamanwa1 | ISEA | Philippines | modern | 0 | Austronesian | 9.76  | 125.51 | Mamanwa | N.A. | Qin_and_Stoneking_2015 | PASS |
| PH56_1  | Mamanwa1 | ISEA | Philippines | modern | 0 | Austronesian | 9.76  | 125.51 | Mamanwa | N.A. | Qin_and_Stoneking_2015 | PASS |
| Smd1_1  | Semende  | ISEA | Indonesia   | modern | 0 | Austronesian | 3.58  | 98.67  | Semende | N.A. | Qin_and_Stoneking_2015 | PASS |
| Smd10_1 | Semende  | ISEA | Indonesia   | modern | 0 | Austronesian | 3.58  | 98.67  | Semende | N.A. | Qin_and_Stoneking_2015 | PASS |
| Smd14_1 | Semende  | ISEA | Indonesia   | modern | 0 | Austronesian | 3.58  | 98.67  | Semende | N.A. | Qin_and_Stoneking_2015 | PASS |
| Smd15_1 | Semende  | ISEA | Indonesia   | modern | 0 | Austronesian | 3.58  | 98.67  | Semende | N.A. | Qin_and_Stoneking_2015 | PASS |
| Smd18_1 | Semende  | ISEA | Indonesia   | modern | 0 | Austronesian | 3.58  | 98.67  | Semende | N.A. | Qin_and_Stoneking_2015 | PASS |
| Smd19_1 | Semende  | ISEA | Indonesia   | modern | 0 | Austronesian | 3.58  | 98.67  | Semende | N.A. | Qin_and_Stoneking_2015 | PASS |
| Smd3_1  | Semende  | ISEA | Indonesia   | modern | 0 | Austronesian | 3.58  | 98.67  | Semende | N.A. | Qin_and_Stoneking_2015 | PASS |
| Smd5_1  | Semende  | ISEA | Indonesia   | modern | 0 | Austronesian | 3.58  | 98.67  | Semende | N.A. | Qin_and_Stoneking_2015 | PASS |
| Smd6_1  | Semende  | ISEA | Indonesia   | modern | 0 | Austronesian | 3.58  | 98.67  | Semende | N.A. | Qin_and_Stoneking_2015 | PASS |
| Smd9_1  | Semende  | ISEA | Indonesia   | modern | 0 | Austronesian | 3.58  | 98.67  | Semende | N.A. | Qin_and_Stoneking_2015 | PASS |
| Bor1_5  | Borneo   | ISEA | Indonesia   | modern | 0 | Austronesian | 0.18  | 110.16 | Borneo  | N.A. | Qin_and_Stoneking_2015 | PASS |
| Bor16_1 | Borneo   | ISEA | Indonesia   | modern | 0 | Austronesian | 0.18  | 110.16 | Borneo  | N.A. | Qin_and_Stoneking_2015 | PASS |
| Bor2_3  | Borneo   | ISEA | Indonesia   | modern | 0 | Austronesian | 0.18  | 110.16 | Borneo  | N.A. | Qin_and_Stoneking_2015 | PASS |
| Bor20_1 | Borneo   | ISEA | Indonesia   | modern | 0 | Austronesian | 0.18  | 110.16 | Borneo  | N.A. | Qin_and_Stoneking_2015 | PASS |
| Bor3_3  | Borneo   | ISEA | Indonesia   | modern | 0 | Austronesian | 0.18  | 110.16 | Borneo  | N.A. | Qin_and_Stoneking_2015 | PASS |
| Bor4_5  | Borneo   | ISEA | Indonesia   | modern | 0 | Austronesian | 0.18  | 110.16 | Borneo  | N.A. | Qin_and_Stoneking_2015 | PASS |
| Bor6_1  | Borneo   | ISEA | Indonesia   | modern | 0 | Austronesian | 0.18  | 110.16 | Borneo  | N.A. | Qin_and_Stoneking_2015 | PASS |
| Bor7_2  | Borneo   | ISEA | Indonesia   | modern | 0 | Austronesian | 0.18  | 110.16 | Borneo  | N.A. | Qin_and_Stoneking_2015 | PASS |
| Bor9_3  | Borneo   | ISEA | Indonesia   | modern | 0 | Austronesian | 0.18  | 110.16 | Borneo  | N.A. | Qin_and_Stoneking_2015 | PASS |
| Dusun4  | Dusun    | ISEA | Brunei      | modern | 0 | Austronesian | 4.71  | 114.67 | Dusun   | N.A. | Skoglund_et_al_2016    | PASS |
| Dusun7  | Dusun    | ISEA | Brunei      | modern | 0 | Austronesian | 4.71  | 114.67 | Dusun   | N.A. | Skoglund_et_al_2016    | PASS |
| Dusun8  | Dusun    | ISEA | Brunei      | modern | 0 | Austronesian | 4.71  | 114.67 | Dusun   | N.A. | Skoglund_et_al_2016    | PASS |
| Dusun10 | Dusun    | ISEA | Brunei      | modern | 0 | Austronesian | 4.71  | 114.67 | Dusun   | N.A. | Skoglund_et_al_2016    | PASS |
| Dusun11 | Dusun    | ISEA | Brunei      | modern | 0 | Austronesian | 4.71  | 114.67 | Dusun   | N.A. | Skoglund_et_al_2016    | PASS |
| Dusun12 | Dusun    | ISEA | Brunei      | modern | 0 | Austronesian | 4.71  | 114.67 | Dusun   | N.A. | Skoglund_et_al_2016    | PASS |
| Dusun14 | Dusun    | ISEA | Brunei      | modern | 0 | Austronesian | 4.71  | 114.67 | Dusun   | N.A. | Skoglund_et_al_2016    | PASS |
| Dusun21 | Dusun    | ISEA | Brunei      | modern | 0 | Austronesian | 4.71  | 114.67 | Dusun   | N.A. | Skoglund_et_al_2016    | PASS |
| Dusun22 | Dusun    | ISEA | Brunei      | modern | 0 | Austronesian | 4.71  | 114.67 | Dusun   | N.A. | Skoglund_et_al_2016    | PASS |
| Dusun23 | Dusun    | ISEA | Brunei      | modern | 0 | Austronesian | 4.71  | 114.67 | Dusun   | N.A. | Skoglund_et_al_2016    | PASS |
| Murut2  | Murut    | ISEA | Brunei      | modern | 0 | Austronesian | 4.62  | 115.14 | Murut   | N.A. | Skoglund_et_al_2016    | PASS |
| Murut3  | Murut    | ISEA | Brunei      | modern | 0 | Austronesian | 4.62  | 115.14 | Murut   | N.A. | Skoglund_et_al_2016    | PASS |
| Murut4  | Murut    | ISEA | Brunei      | modern | 0 | Austronesian | 4.62  | 115.14 | Murut   | N.A. | Skoglund_et_al_2016    | PASS |
| Murut5  | Murut    | ISEA | Brunei      | modern | 0 | Austronesian | 4.62  | 115.14 | Murut   | N.A. | Skoglund_et_al_2016    | PASS |
| Murut6  | Murut    | ISEA | Brunei      | modern | 0 | Austronesian | 4.62  | 115.14 | Murut   | N.A. | Skoglund_et_al_2016    | PASS |
| Murut9  | Murut    | ISEA | Brunei      | modern | 0 | Austronesian | 4.62  | 115.14 | Murut   | N.A. | Skoglund_et_al_2016    | PASS |
| Murut11 | Murut    | ISEA | Brunei      | modern | 0 | Austronesian | 4.62  | 115.14 | Murut   | N.A. | Skoglund_et_al_2016    | PASS |
| Murut13 | Murut    | ISEA | Brunei      | modern | 0 | Austronesian | 4.62  | 115.14 | Murut   | N.A. | Skoglund_et_al_2016    | PASS |
| Murut15 | Murut    | ISEA | Brunei      | modern | 0 | Austronesian | 4.62  | 115.14 | Murut   | N.A. | Skoglund_et_al_2016    | PASS |
| Murut17 | Murut    | ISEA | Brunei      | modern | 0 | Austronesian | 4.62  | 115.14 | Murut   | N.A. | Skoglund_et_al_2016    | PASS |
| Burm4   | Burmese  | MSEA | Myanmar     | modern | 0 | Sino-Tibetan | 16.41 | 95.89  | Burmese | N.A. | Skoglund_et_al_2016    | PASS |
| Burm7   | Burmese  | MSEA | Myanmar     | modern | 0 | Sino-Tibetan | 16.41 | 95.89  | Burmese | N.A. | Skoglund_et_al_2016    | PASS |

|          |           |      |             |        |   |              |       |        |           |      |                      |      |
|----------|-----------|------|-------------|--------|---|--------------|-------|--------|-----------|------|----------------------|------|
| Burm8    | Burmese   | MSEA | Myanmar     | modern | 0 | Sino-Tibetan | 16.41 | 95.89  | Burmese   | N.A. | Skoglund_et_al_2016  | PASS |
| Burm9    | Burmese   | MSEA | Myanmar     | modern | 0 | Sino-Tibetan | 16.41 | 95.89  | Burmese   | N.A. | Skoglund_et_al_2016  | PASS |
| Burm10   | Burmese   | MSEA | Myanmar     | modern | 0 | Sino-Tibetan | 16.41 | 95.89  | Burmese   | N.A. | Skoglund_et_al_2016  | PASS |
| Burm12   | Burmese   | MSEA | Myanmar     | modern | 0 | Sino-Tibetan | 16.41 | 95.89  | Burmese   | N.A. | Skoglund_et_al_2016  | PASS |
| Burm13   | Burmese   | MSEA | Myanmar     | modern | 0 | Sino-Tibetan | 16.41 | 95.89  | Burmese   | N.A. | Skoglund_et_al_2016  | PASS |
| Burm14   | Burmese   | MSEA | Myanmar     | modern | 0 | Sino-Tibetan | 16.41 | 95.89  | Burmese   | N.A. | Skoglund_et_al_2016  | PASS |
| Burm15   | Burmese   | MSEA | Myanmar     | modern | 0 | Sino-Tibetan | 16.41 | 95.89  | Burmese   | N.A. | Skoglund_et_al_2016  | PASS |
| Burm16   | Burmese   | MSEA | Myanmar     | modern | 0 | Sino-Tibetan | 16.41 | 95.89  | Burmese   | N.A. | Skoglund_et_al_2016  | PASS |
| Igorot3  | Kankanaey | ISEA | Philippines | modern | 0 | Austronesian | 17.07 | 121.03 | Kankanaey | N.A. | Skoglund_et_al_2016  | PASS |
| Igorot4  | Kankanaey | ISEA | Philippines | modern | 0 | Austronesian | 17.07 | 121.03 | Kankanaey | N.A. | Skoglund_et_al_2016  | PASS |
| Igorot5  | Kankanaey | ISEA | Philippines | modern | 0 | Austronesian | 17.07 | 121.03 | Kankanaey | N.A. | Skoglund_et_al_2016  | PASS |
| Igorot6  | Kankanaey | ISEA | Philippines | modern | 0 | Austronesian | 17.07 | 121.03 | Kankanaey | N.A. | Skoglund_et_al_2016  | PASS |
| Igorot10 | Kankanaey | ISEA | Philippines | modern | 0 | Austronesian | 17.07 | 121.03 | Kankanaey | N.A. | Skoglund_et_al_2016  | PASS |
| Igorot11 | Kankanaey | ISEA | Philippines | modern | 0 | Austronesian | 17.07 | 121.03 | Kankanaey | N.A. | Skoglund_et_al_2016  | PASS |
| Igorot13 | Kankanaey | ISEA | Philippines | modern | 0 | Austronesian | 17.07 | 121.03 | Kankanaey | N.A. | Skoglund_et_al_2016  | PASS |
| Igorot17 | Kankanaey | ISEA | Philippines | modern | 0 | Austronesian | 17.07 | 121.03 | Kankanaey | N.A. | Skoglund_et_al_2016  | PASS |
| Igorot21 | Kankanaey | ISEA | Philippines | modern | 0 | Austronesian | 17.07 | 121.03 | Kankanaey | N.A. | Skoglund_et_al_2016  | PASS |
| Igorot23 | Kankanaey | ISEA | Philippines | modern | 0 | Austronesian | 17.07 | 121.03 | Kankanaey | N.A. | Skoglund_et_al_2016  | PASS |
| Luz2     | Ilocano   | ISEA | Philippines | modern | 0 | Austronesian | 14.6  | 120.98 | Ilocano   | N.A. | Skoglund_et_al_2016  | PASS |
| Luz6     | Ilocano   | ISEA | Philippines | modern | 0 | Austronesian | 14.6  | 120.98 | Ilocano   | N.A. | Skoglund_et_al_2016  | PASS |
| Luz5     | Tagalog   | ISEA | Philippines | modern | 0 | Austronesian | 14.6  | 120.98 | Tagalog   | N.A. | Skoglund_et_al_2016  | PASS |
| Luz8     | Tagalog   | ISEA | Philippines | modern | 0 | Austronesian | 14.6  | 120.98 | Tagalog   | N.A. | Skoglund_et_al_2016  | PASS |
| Luz9     | Tagalog   | ISEA | Philippines | modern | 0 | Austronesian | 14.6  | 120.98 | Tagalog   | N.A. | Skoglund_et_al_2016  | PASS |
| Luz10    | Tagalog   | ISEA | Philippines | modern | 0 | Austronesian | 14.6  | 120.98 | Tagalog   | N.A. | Skoglund_et_al_2016  | PASS |
| Luz11    | Tagalog   | ISEA | Philippines | modern | 0 | Austronesian | 14.6  | 120.98 | Tagalog   | N.A. | Skoglund_et_al_2016  | PASS |
| Vizaya1  | Visayan   | ISEA | Philippines | modern | 0 | Austronesian | 9.76  | 125.51 | Visayan   | N.A. | Skoglund_et_al_2016  | PASS |
| Vizaya2  | Visayan   | ISEA | Philippines | modern | 0 | Austronesian | 9.76  | 125.51 | Visayan   | N.A. | Skoglund_et_al_2016  | PASS |
| Vizaya3  | Visayan   | ISEA | Philippines | modern | 0 | Austronesian | 9.76  | 125.51 | Visayan   | N.A. | Skoglund_et_al_2016  | PASS |
| Vizaya4  | Visayan   | ISEA | Philippines | modern | 0 | Austronesian | 9.76  | 125.51 | Visayan   | N.A. | Skoglund_et_al_2016  | PASS |
| Malay2   | Malay     | ISEA | Singapore   | modern | 0 | Austronesian | 1.35  | 103.82 | Malay     | N.A. | Skoglund_et_al_2016  | PASS |
| Malay5   | Malay     | ISEA | Singapore   | modern | 0 | Austronesian | 1.35  | 103.82 | Malay     | N.A. | Skoglund_et_al_2016  | PASS |
| Malay6   | Malay     | ISEA | Singapore   | modern | 0 | Austronesian | 1.35  | 103.82 | Malay     | N.A. | Skoglund_et_al_2016  | PASS |
| Malay10  | Malay     | ISEA | Singapore   | modern | 0 | Austronesian | 1.35  | 103.82 | Malay     | N.A. | Skoglund_et_al_2016  | PASS |
| Malay11  | Malay     | ISEA | Singapore   | modern | 0 | Austronesian | 1.35  | 103.82 | Malay     | N.A. | Skoglund_et_al_2016  | PASS |
| Malay13  | Malay     | ISEA | Singapore   | modern | 0 | Austronesian | 1.35  | 103.82 | Malay     | N.A. | Skoglund_et_al_2016  | PASS |
| Malay14  | Malay     | ISEA | Singapore   | modern | 0 | Austronesian | 1.35  | 103.82 | Malay     | N.A. | Skoglund_et_al_2016  | PASS |
| Malay20  | Malay     | ISEA | Singapore   | modern | 0 | Austronesian | 1.35  | 103.82 | Malay     | N.A. | Skoglund_et_al_2016  | PASS |
| Malay21  | Malay     | ISEA | Singapore   | modern | 0 | Austronesian | 1.35  | 103.82 | Malay     | N.A. | Skoglund_et_al_2016  | PASS |
| NA13607  | Amis_HO   | sEA  | Taiwan      | modern | 0 | Austronesian | 22.8  | 121.2  | Amis      | TW_S | Lazaridis_et_al_2014 | PASS |
| NA13608  | Amis_HO   | sEA  | Taiwan      | modern | 0 | Austronesian | 22.8  | 121.2  | Amis      | TW_S | Lazaridis_et_al_2014 | PASS |
| NA13609  | Amis_HO   | sEA  | Taiwan      | modern | 0 | Austronesian | 22.8  | 121.2  | Amis      | TW_S | Lazaridis_et_al_2014 | PASS |
| NA13610  | Amis_HO   | sEA  | Taiwan      | modern | 0 | Austronesian | 22.8  | 121.2  | Amis      | TW_S | Lazaridis_et_al_2014 | PASS |
| NA13611  | Amis_HO   | sEA  | Taiwan      | modern | 0 | Austronesian | 22.8  | 121.2  | Amis      | TW_S | Lazaridis_et_al_2014 | PASS |
| NA13612  | Amis_HO   | sEA  | Taiwan      | modern | 0 | Austronesian | 22.8  | 121.2  | Amis      | TW_S | Lazaridis_et_al_2014 | PASS |















|         |               |     |       |        |   |              |      |       |      |      |                   |      |
|---------|---------------|-----|-------|--------|---|--------------|------|-------|------|------|-------------------|------|
| EYG40   | Yugur         | nEA | China | modern | 0 | Mongolic     | 38.9 | 99.6  | N.A. | N.A. | Wang_C_et_al_2021 | PASS |
| EYG06   | Yugur         | nEA | China | modern | 0 | Mongolic     | 38.9 | 99.6  | N.A. | N.A. | Wang_C_et_al_2021 | PASS |
| EYG25   | Yugur         | nEA | China | modern | 0 | Mongolic     | 38.9 | 99.6  | N.A. | N.A. | Wang_C_et_al_2021 | PASS |
| EYG42   | Yugur         | nEA | China | modern | 0 | Mongolic     | 38.9 | 99.6  | N.A. | N.A. | Wang_C_et_al_2021 | PASS |
| EYG46   | Yugur         | nEA | China | modern | 0 | Mongolic     | 38.9 | 99.6  | N.A. | N.A. | Wang_C_et_al_2021 | PASS |
| EYG24   | Yugur         | nEA | China | modern | 0 | Mongolic     | 38.9 | 99.6  | N.A. | N.A. | Wang_C_et_al_2021 | PASS |
| Han516  | Han_Chongqing | sEA | China | modern | 0 | Sino-Tibetan | 29.3 | 106.3 | Han  | N.A. | Wang_C_et_al_2021 | PASS |
| Han1968 | Han_Chongqing | sEA | China | modern | 0 | Sino-Tibetan | 29.3 | 106.3 | Han  | N.A. | Wang_C_et_al_2021 | PASS |
| Han2150 | Han_Chongqing | sEA | China | modern | 0 | Sino-Tibetan | 29.3 | 106.3 | Han  | N.A. | Wang_C_et_al_2021 | PASS |
| Han1994 | Han_Fujian    | sEA | China | modern | 0 | Sino-Tibetan | 26.1 | 119.3 | Han  | N.A. | Wang_C_et_al_2021 | PASS |
| Han1467 | Han_Fujian    | sEA | China | modern | 0 | Sino-Tibetan | 26.1 | 119.3 | Han  | N.A. | Wang_C_et_al_2021 | PASS |
| Han1619 | Han_Fujian    | sEA | China | modern | 0 | Sino-Tibetan | 26.1 | 119.3 | Han  | N.A. | Wang_C_et_al_2021 | PASS |
| Han1900 | Han_Fujian    | sEA | China | modern | 0 | Sino-Tibetan | 26.1 | 119.3 | Han  | N.A. | Wang_C_et_al_2021 | PASS |
| Han1934 | Han_Fujian    | sEA | China | modern | 0 | Sino-Tibetan | 26.1 | 119.3 | Han  | N.A. | Wang_C_et_al_2021 | PASS |
| Han1207 | Han_Guangdong | sEA | China | modern | 0 | Sino-Tibetan | 23.2 | 113.2 | Han  | N.A. | Wang_C_et_al_2021 | PASS |
| Han1235 | Han_Guangdong | sEA | China | modern | 0 | Sino-Tibetan | 23.2 | 113.2 | Han  | N.A. | Wang_C_et_al_2021 | PASS |
| Han1415 | Han_Guangdong | sEA | China | modern | 0 | Sino-Tibetan | 23.2 | 113.2 | Han  | N.A. | Wang_C_et_al_2021 | PASS |
| Han1432 | Han_Guangdong | sEA | China | modern | 0 | Sino-Tibetan | 23.2 | 113.2 | Han  | N.A. | Wang_C_et_al_2021 | PASS |
| Han1434 | Han_Guangdong | sEA | China | modern | 0 | Sino-Tibetan | 23.2 | 113.2 | Han  | N.A. | Wang_C_et_al_2021 | PASS |
| Han2087 | Han_Guangdong | sEA | China | modern | 0 | Sino-Tibetan | 23.2 | 113.2 | Han  | N.A. | Wang_C_et_al_2021 | PASS |
| Han2088 | Han_Guangdong | sEA | China | modern | 0 | Sino-Tibetan | 23.2 | 113.2 | Han  | N.A. | Wang_C_et_al_2021 | PASS |
| Han894  | Han_Henan     | nEA | China | modern | 0 | Sino-Tibetan | 34.8 | 113.6 | Han  | N.A. | Wang_C_et_al_2021 | PASS |
| Han1226 | Han_Henan     | nEA | China | modern | 0 | Sino-Tibetan | 34.8 | 113.6 | Han  | N.A. | Wang_C_et_al_2021 | PASS |
| Han1243 | Han_Henan     | nEA | China | modern | 0 | Sino-Tibetan | 34.8 | 113.6 | Han  | N.A. | Wang_C_et_al_2021 | PASS |
| Han1713 | Han_Henan     | nEA | China | modern | 0 | Sino-Tibetan | 34.8 | 113.6 | Han  | N.A. | Wang_C_et_al_2021 | PASS |
| Han1714 | Han_Henan     | nEA | China | modern | 0 | Sino-Tibetan | 34.8 | 113.6 | Han  | N.A. | Wang_C_et_al_2021 | PASS |
| Han788  | Han_Hubei     | sEA | China | modern | 0 | Sino-Tibetan | 30.5 | 114.3 | Han  | N.A. | Wang_C_et_al_2021 | PASS |
| Han789  | Han_Hubei     | sEA | China | modern | 0 | Sino-Tibetan | 30.5 | 114.3 | Han  | N.A. | Wang_C_et_al_2021 | PASS |
| Han874  | Han_Hubei     | sEA | China | modern | 0 | Sino-Tibetan | 30.5 | 114.3 | Han  | N.A. | Wang_C_et_al_2021 | PASS |
| Han2161 | Han_Hubei     | sEA | China | modern | 0 | Sino-Tibetan | 30.5 | 114.3 | Han  | N.A. | Wang_C_et_al_2021 | PASS |
| Han2162 | Han_Hubei     | sEA | China | modern | 0 | Sino-Tibetan | 30.5 | 114.3 | Han  | N.A. | Wang_C_et_al_2021 | PASS |
| Han1452 | Han_Jiangsu   | sEA | China | modern | 0 | Sino-Tibetan | 32.1 | 118.8 | Han  | N.A. | Wang_C_et_al_2021 | PASS |
| Han1962 | Han_Jiangsu   | sEA | China | modern | 0 | Sino-Tibetan | 32.1 | 118.8 | Han  | N.A. | Wang_C_et_al_2021 | PASS |
| Han2054 | Han_Jiangsu   | sEA | China | modern | 0 | Sino-Tibetan | 32.1 | 118.8 | Han  | N.A. | Wang_C_et_al_2021 | PASS |
| Han2057 | Han_Jiangsu   | sEA | China | modern | 0 | Sino-Tibetan | 32.1 | 118.8 | Han  | N.A. | Wang_C_et_al_2021 | PASS |
| Han2058 | Han_Jiangsu   | sEA | China | modern | 0 | Sino-Tibetan | 32.1 | 118.8 | Han  | N.A. | Wang_C_et_al_2021 | PASS |
| Han2076 | Han_Jiangsu   | sEA | China | modern | 0 | Sino-Tibetan | 32.1 | 118.8 | Han  | N.A. | Wang_C_et_al_2021 | PASS |
| Han2090 | Han_Jiangsu   | sEA | China | modern | 0 | Sino-Tibetan | 32.1 | 118.8 | Han  | N.A. | Wang_C_et_al_2021 | PASS |
| Han4    | Han_Shandong  | nEA | China | modern | 0 | Sino-Tibetan | 36.6 | 117   | Han  | N.A. | Wang_C_et_al_2021 | PASS |
| Han25   | Han_Shandong  | nEA | China | modern | 0 | Sino-Tibetan | 36.6 | 117   | Han  | N.A. | Wang_C_et_al_2021 | PASS |
| Han853  | Han_Shandong  | nEA | China | modern | 0 | Sino-Tibetan | 36.6 | 117   | Han  | N.A. | Wang_C_et_al_2021 | PASS |
| Han1329 | Han_Shandong  | nEA | China | modern | 0 | Sino-Tibetan | 36.6 | 117   | Han  | N.A. | Wang_C_et_al_2021 | PASS |
| Han1616 | Han_Shandong  | nEA | China | modern | 0 | Sino-Tibetan | 36.6 | 117   | Han  | N.A. | Wang_C_et_al_2021 | PASS |
| Han1840 | Han_Shandong  | nEA | China | modern | 0 | Sino-Tibetan | 36.6 | 117   | Han  | N.A. | Wang_C_et_al_2021 | PASS |

















|             |                         |               |          |         |       |                  |       |        |        |      |                       |       |
|-------------|-------------------------|---------------|----------|---------|-------|------------------|-------|--------|--------|------|-----------------------|-------|
| Ta80        | Tamang                  | SouthA<br>sia | Nepal    | modern  | 0     | Sino-<br>Tibetan | 27.4  | 86.2   | Tamang | N.A. | Wang_C_et_al_<br>2021 | PASS  |
| Ta52        | Tamang                  | SouthA<br>sia | Nepal    | modern  | 0     | Sino-<br>Tibetan | 27.4  | 86.2   | Tamang | N.A. | Wang_C_et_al_<br>2021 | PASS  |
| Ta05        | Tamang                  | SouthA<br>sia | Nepal    | modern  | 0     | Sino-<br>Tibetan | 27.4  | 86.2   | Tamang | N.A. | Wang_C_et_al_<br>2021 | PASS  |
| Ta03        | Tamang                  | SouthA<br>sia | Nepal    | modern  | 0     | Sino-<br>Tibetan | 27.4  | 86.2   | Tamang | N.A. | Wang_C_et_al_<br>2021 | PASS  |
| TY          | Tianyuan_40000<br>BP    | nEA           | China    | ancient | 40000 | N.A.             | 39.4  | 115.5  | N.A.   | N.A. | Yang_et_al_201<br>7   | PASS  |
| Yumin       | Yumin_8400BP            | nEA           | Mongolia | ancient | 8375  | N.A.             | 42    | 114.2  | N.A.   | N.A. | Yang_et_al_202<br>0   | PASS  |
| Bianbian    | Bianbian_9500B<br>P     | nEA           | China    | ancient | 9513  | N.A.             | 36.1  | 118.5  | N.A.   | N.A. | Yang_et_al_202<br>0   | PASS  |
| BS          | Boshan_8200BP           | nEA           | China    | ancient | 8180  | N.A.             | 36.5  | 117.9  | N.A.   | N.A. | Yang_et_al_202<br>0   | PASS  |
| XJS1309_M7  | Xiaojingshan_780<br>0BP | nEA           | China    | ancient | 7797  | N.A.             | 36.5  | 117.9  | N.A.   | N.A. | Yang_et_al_202<br>0   | PASS  |
| XJS1311_M16 | Xiaojingshan_780<br>0BP | nEA           | China    | ancient | 7861  | N.A.             | 36.5  | 117    | N.A.   | N.A. | Yang_et_al_202<br>0   | PASS  |
| XJS1309_M4  | Xiaojingshan_780<br>0BP | nEA           | China    | ancient | 7806  | N.A.             | 36.5  | 117    | N.A.   | N.A. | Yang_et_al_202<br>0   | PASS  |
| Xiaogao     | Xiaogao_8700BP          | nEA           | China    | ancient | 8684  | N.A.             | 37.9  | 117.6  | N.A.   | N.A. | Yang_et_al_202<br>0   | PASS  |
| Qihe2_d     | Qihe_8400BP             | sEA           | China    | ancient | 8394  | N.A.             | 25.4  | 117.6  | N.A.   | N.A. | Yang_et_al_202<br>0   | PASS  |
| LD1         | Liangdao_7750B<br>P     | sEA           | Taiwan   | ancient | 8190  | N.A.             | 26.3  | 120.2  | N.A.   | N.A. | Yang_et_al_202<br>0   | PASS  |
| LD2         | Liangdao_7750B<br>P     | sEA           | Taiwan   | ancient | 7575  | N.A.             | 26.3  | 120.2  | N.A.   | N.A. | Yang_et_al_202<br>0   | PASS  |
| SuogangB1_d | Suogang_4550B<br>P      | sEA           | Taiwan   | ancient | 4550  | N.A.             | 23.5  | 119.6  | N.A.   | N.A. | Yang_et_al_202<br>0   | PASS  |
| SuogangB3_d | Suogang_4550B<br>P      | sEA           | Taiwan   | ancient | 4550  | N.A.             | 23.5  | 119.6  | N.A.   | N.A. | Yang_et_al_202<br>0   | PASS  |
| L5705       | Xitoucun_4500B<br>P     | sEA           | China    | ancient | 4333  | N.A.             | 26.2  | 119.1  | N.A.   | N.A. | Yang_et_al_202<br>0   | PASS  |
| L5700       | Xitoucun_4500B<br>P     | sEA           | China    | ancient | 4474  | N.A.             | 26.2  | 119.1  | N.A.   | N.A. | Yang_et_al_202<br>0   | PASS  |
| L5692_d     | Xitoucun_4500B<br>P     | sEA           | China    | ancient | 4474  | N.A.             | 26.2  | 119.1  | N.A.   | N.A. | Yang_et_al_202<br>0   | imiss |
| L5706_d     | Xitoucun_4500B<br>P     | sEA           | China    | ancient | 4467  | N.A.             | 26.2  | 119.1  | N.A.   | N.A. | Yang_et_al_202<br>0   | PASS  |
| L5704_d     | Xitoucun_4500B<br>P     | sEA           | China    | ancient | 4502  | N.A.             | 26.2  | 119.1  | N.A.   | N.A. | Yang_et_al_202<br>0   | PASS  |
| L5703_d     | Xitoucun_4500B<br>P     | sEA           | China    | ancient | 4572  | N.A.             | 26.2  | 119.1  | N.A.   | N.A. | Yang_et_al_202<br>0   | imiss |
| L5701_d     | Xitoucun_4500B<br>P     | sEA           | China    | ancient | 4329  | N.A.             | 26.2  | 119.1  | N.A.   | N.A. | Yang_et_al_202<br>0   | PASS  |
| L7415       | Tanshishan_4350<br>BP   | sEA           | China    | ancient | 4333  | N.A.             | 26.1  | 119.2  | N.A.   | N.A. | Yang_et_al_202<br>0   | PASS  |
| L7417_d     | Tanshishan_4350<br>BP   | sEA           | China    | ancient | 4472  | N.A.             | 26.1  | 119.2  | N.A.   | N.A. | Yang_et_al_202<br>0   | PASS  |
| L5698_d     | Tanshishan_4350<br>BP   | sEA           | China    | ancient | 4318  | N.A.             | 26.2  | 119.1  | N.A.   | N.A. | Yang_et_al_202<br>0   | imiss |
| L5696_d     | Tanshishan_4350<br>BP   | sEA           | China    | ancient | NA    | N.A.             | 26.2  | 119.1  | N.A.   | N.A. | Yang_et_al_202<br>0   | imiss |
| L5694       | Chuanyun_300B<br>P      | sEA           | China    | ancient | 308   | N.A.             | 25.6  | 117.3  | N.A.   | N.A. | Yang_et_al_202<br>0   | PASS  |
| I3354       | Boisman_6900B<br>P      | nEA           | Russia   | ancient | 7237  | N.A.             | 42.79 | 131.28 | N.A.   | N.A. | Wang_C_et_al_<br>2021 | PASS  |
| I1196       | Boisman_6900B<br>P      | nEA           | Russia   | ancient | 7058  | N.A.             | 42.79 | 131.28 | N.A.   | N.A. | Wang_C_et_al_<br>2021 | PASS  |
| I1198       | Boisman_6900B<br>P      | nEA           | Russia   | ancient | 6872  | N.A.             | 42.79 | 131.28 | N.A.   | N.A. | Wang_C_et_al_<br>2021 | PASS  |
| I1193       | Boisman_6900B<br>P      | nEA           | Russia   | ancient | 6832  | N.A.             | 42.79 | 131.28 | N.A.   | N.A. | Wang_C_et_al_<br>2021 | PASS  |
| I3355       | Boisman_6900B<br>P      | nEA           | Russia   | ancient | 6821  | N.A.             | 42.79 | 131.28 | N.A.   | N.A. | Wang_C_et_al_<br>2021 | PASS  |
| I1197       | Boisman_6900B<br>P      | nEA           | Russia   | ancient | 6804  | N.A.             | 42.79 | 131.28 | N.A.   | N.A. | Wang_C_et_al_<br>2021 | PASS  |
| I1190       | Boisman_6900B<br>P      | nEA           | Russia   | ancient | 6675  | N.A.             | 42.79 | 131.28 | N.A.   | N.A. | Wang_C_et_al_<br>2021 | PASS  |
| I1194       | Boisman_6900B<br>P      | nEA           | Russia   | ancient | 6652  | N.A.             | 42.79 | 131.28 | N.A.   | N.A. | Wang_C_et_al_<br>2021 | PASS  |
| I14819      | Boisman_5600B<br>P      | nEA           | Russia   | ancient | 5625  | N.A.             | 42.79 | 131.28 | N.A.   | N.A. | Wang_C_et_al_<br>2021 | PASS  |
| I3356       | Boisman_5600B<br>P      | nEA           | Russia   | ancient | 5605  | N.A.             | 42.79 | 131.28 | N.A.   | N.A. | Wang_C_et_al_<br>2021 | PASS  |
| I1206       | Boisman_6900B<br>P      | nEA           | Russia   | ancient | 6954  | N.A.             | 42.79 | 131.28 | N.A.   | N.A. | Wang_C_et_al_<br>2021 | PASS  |
| I13886      | Jomon_3500BP            | nEA           | Japan    | ancient | 4003  | N.A.             | 35.55 | 140.16 | N.A.   | N.A. | Wang_C_et_al_<br>2021 | PASS  |
| I13884      | Jomon_3500BP            | nEA           | Japan    | ancient | 4351  | N.A.             | 35.55 | 140.16 | N.A.   | N.A. | Wang_C_et_al_<br>2021 | PASS  |
| I6341       | Jomon_3500BP            | nEA           | Japan    | ancient | 4200  | N.A.             | 45.37 | 141.03 | N.A.   | N.A. | Wang_C_et_al_<br>2021 | PASS  |
| I13882      | Jomon_3500BP            | nEA           | Japan    | ancient | 3234  | N.A.             | 35.55 | 140.16 | N.A.   | N.A. | Wang_C_et_al_<br>2021 | PASS  |

|             |                          |     |          |         |      |      |       |        |      |      |                   |       |
|-------------|--------------------------|-----|----------|---------|------|------|-------|--------|------|------|-------------------|-------|
| I13885      | Jomon_3500BP             | nEA | Japan    | ancient | 3216 | N.A. | 35.55 | 140.16 | N.A. | N.A. | Wang_C_et_al_2021 | PASS  |
| I13883      | Jomon_3500BP             | nEA | Japan    | ancient | 2859 | N.A. | 35.55 | 140.16 | N.A. | N.A. | Wang_C_et_al_2021 | PASS  |
| I6358       | Mongolia_7300BP          | nEA | Mongolia | ancient | 7167 | N.A. | 48.29 | 115.1  | N.A. | N.A. | Wang_C_et_al_2021 | PASS  |
| I7021       | Mongolia_7300BP          | nEA | Mongolia | ancient | 7050 | N.A. | 48    | 113.93 | N.A. | N.A. | Wang_C_et_al_2021 | PASS  |
| I11696      | Mongolia_7300BP          | nEA | Mongolia | ancient | 7528 | N.A. | 49.39 | 102.7  | N.A. | N.A. | Wang_C_et_al_2021 | PASS  |
| I11698      | Mongolia_7300BP          | nEA | Mongolia | ancient | 7520 | N.A. | 49.39 | 102.7  | N.A. | N.A. | Wang_C_et_al_2021 | PASS  |
| I11697      | Mongolia_7300BP          | nEA | Mongolia | ancient | 7500 | N.A. | 49.39 | 102.7  | N.A. | N.A. | Wang_C_et_al_2021 | PASS  |
| I13179      | Mongolia_7300BP          | nEA | Mongolia | ancient | 7515 | N.A. | 49.39 | 102.7  | N.A. | N.A. | Wang_C_et_al_2021 | PASS  |
| I13698      | Mongolia_7300BP          | nEA | Mongolia | ancient | 7504 | N.A. | 49.53 | 103.28 | N.A. | N.A. | Wang_C_et_al_2021 | PASS  |
| I14000      | Mongolia_7300BP          | nEA | Mongolia | ancient | 7480 | N.A. | 49.53 | 103.28 | N.A. | N.A. | Wang_C_et_al_2021 | PASS  |
| S97.EC      | Wuzhuangguolia ng_5000BP | nEA | China    | ancient | 5050 | N.A. | 37.82 | 109.05 | N.A. | N.A. | Wang_C_et_al_2021 | PASS  |
| S123.EC     | Wuzhuangguolia ng_5000BP | nEA | China    | ancient | 5050 | N.A. | 37.82 | 109.05 | N.A. | N.A. | Wang_C_et_al_2021 | PASS  |
| 18R21262.EC | Wuzhuangguolia ng_5000BP | nEA | China    | ancient | 5050 | N.A. | 37.82 | 109.05 | N.A. | N.A. | Wang_C_et_al_2021 | PASS  |
| S91.EC      | Wuzhuangguolia ng_5000BP | nEA | China    | ancient | 5050 | N.A. | 37.82 | 109.05 | N.A. | N.A. | Wang_C_et_al_2021 | imiss |
| S118.EC     | Wuzhuangguolia ng_5000BP | nEA | China    | ancient | 5050 | N.A. | 37.82 | 109.05 | N.A. | N.A. | Wang_C_et_al_2021 | imiss |
| S120.EC     | Wuzhuangguolia ng_5000BP | nEA | China    | ancient | 5050 | N.A. | 37.82 | 109.05 | N.A. | N.A. | Wang_C_et_al_2021 | imiss |
| 18R21265.EC | Wuzhuangguolia ng_5000BP | nEA | China    | ancient | 5050 | N.A. | 37.82 | 109.05 | N.A. | N.A. | Wang_C_et_al_2021 | imiss |
| 18R21266.EC | Wuzhuangguolia ng_5000BP | nEA | China    | ancient | 4785 | N.A. | 37.82 | 109.05 | N.A. | N.A. | Wang_C_et_al_2021 | PASS  |
| I6221       | Afnasievo_5000BP         | nEA | Mongolia | ancient | 4996 | N.A. | 46.4  | 100.82 | N.A. | N.A. | Wang_C_et_al_2021 | PASS  |
| I13957      | Afnasievo_4600BP         | nEA | Mongolia | ancient | 4625 | N.A. | 49.34 | 88.71  | N.A. | N.A. | Wang_C_et_al_2021 | PASS  |
| I6347       | CenterWest_3100BP        | nEA | Mongolia | ancient | 3295 | N.A. | 49.31 | 95.45  | N.A. | N.A. | Wang_C_et_al_2021 | PASS  |
| I6264       | CenterWest_3100BP        | nEA | Mongolia | ancient | 3275 | N.A. | 45.92 | 100.83 | N.A. | N.A. | Wang_C_et_al_2021 | PASS  |
| I6262       | CenterWest_3100BP        | nEA | Mongolia | ancient | 3270 | N.A. | 45.92 | 100.83 | N.A. | N.A. | Wang_C_et_al_2021 | PASS  |
| I13766      | CenterWest_3100BP        | nEA | Mongolia | ancient | 3208 | N.A. | 46.43 | 100.82 | N.A. | N.A. | Wang_C_et_al_2021 | PASS  |
| I13767      | CenterWest_3100BP        | nEA | Mongolia | ancient | 3198 | N.A. | 48.11 | 102.55 | N.A. | N.A. | Wang_C_et_al_2021 | PASS  |
| I12975      | CenterWest_3100BP        | nEA | Mongolia | ancient | 3110 | N.A. | 51.5  | 100.67 | N.A. | N.A. | Wang_C_et_al_2021 | PASS  |
| I7039       | CenterWest_3100BP        | nEA | Mongolia | ancient | 3066 | N.A. | 47.42 | 92.23  | N.A. | N.A. | Wang_C_et_al_2021 | PASS  |
| I13505      | CenterWest_3100BP        | nEA | Mongolia | ancient | 3001 | N.A. | 46.43 | 100.82 | N.A. | N.A. | Wang_C_et_al_2021 | PASS  |
| I6362       | CenterWest_3100BP        | nEA | Mongolia | ancient | 2921 | N.A. | 46.06 | 92.03  | N.A. | N.A. | Wang_C_et_al_2021 | PASS  |
| I6351       | CenterWest_2900BP        | nEA | Mongolia | ancient | 2885 | N.A. | 49.7  | 93.8   | N.A. | N.A. | Wang_C_et_al_2021 | PASS  |
| I12978      | Chemurchek_4450BP        | nEA | Mongolia | ancient | 4472 | N.A. | 46.12 | 91.57  | N.A. | N.A. | Wang_C_et_al_2021 | PASS  |
| I12957      | Chemurchek_4450BP        | nEA | Mongolia | ancient | 4462 | N.A. | 46.12 | 91.57  | N.A. | N.A. | Wang_C_et_al_2021 | PASS  |
| I3620       | Hanben_1550BP            | sEA | Taiwan   | ancient | 1857 | N.A. | 24.33 | 121.77 | N.A. | N.A. | Wang_C_et_al_2021 | PASS  |
| I3615       | Hanben_1550BP            | sEA | Taiwan   | ancient | 1833 | N.A. | 24.33 | 121.77 | N.A. | N.A. | Wang_C_et_al_2021 | PASS  |
| I3617       | Hanben_1550BP            | sEA | Taiwan   | ancient | 1644 | N.A. | 24.33 | 121.77 | N.A. | N.A. | Wang_C_et_al_2021 | PASS  |
| I3616       | Hanben_1550BP            | sEA | Taiwan   | ancient | 1641 | N.A. | 24.33 | 121.77 | N.A. | N.A. | Wang_C_et_al_2021 | PASS  |
| I3621       | Hanben_1550BP            | sEA | Taiwan   | ancient | 1595 | N.A. | 24.33 | 121.77 | N.A. | N.A. | Wang_C_et_al_2021 | PASS  |
| I3618       | Hanben_1550BP            | sEA | Taiwan   | ancient | 1550 | N.A. | 24.33 | 121.77 | N.A. | N.A. | Wang_C_et_al_2021 | PASS  |
| I3731       | Hanben_1550BP            | sEA | Taiwan   | ancient | 1550 | N.A. | 24.33 | 121.77 | N.A. | N.A. | Wang_C_et_al_2021 | PASS  |
| I3727       | Hanben_1550BP            | sEA | Taiwan   | ancient | 1550 | N.A. | 24.33 | 121.77 | N.A. | N.A. | Wang_C_et_al_2021 | PASS  |
| I3736       | Hanben_1550BP            | sEA | Taiwan   | ancient | 1550 | N.A. | 24.33 | 121.77 | N.A. | N.A. | Wang_C_et_al_2021 | PASS  |
| I13692      | Hanben_1550BP            | sEA | Taiwan   | ancient | 1550 | N.A. | 24.33 | 121.77 | N.A. | N.A. | Wang_C_et_al_2021 | PASS  |
| I8074       | Hanben_1550BP            | sEA | Taiwan   | ancient | 1550 | N.A. | 24.33 | 121.77 | N.A. | N.A. | Wang_C_et_al_2021 | PASS  |
| I14929      | Hanben_1550BP            | sEA | Taiwan   | ancient | 1550 | N.A. | 24.33 | 121.77 | N.A. | N.A. | Wang_C_et_al_2021 | PASS  |

|        |                       |     |          |         |      |      |       |        |      |      |                   |       |
|--------|-----------------------|-----|----------|---------|------|------|-------|--------|------|------|-------------------|-------|
| I14931 | Hanben_1550BP         | sEA | Taiwan   | ancient | 1550 | N.A. | 24.33 | 121.77 | N.A. | N.A. | Wang_C_et_al_2021 | PASS  |
| I8080  | Hanben_1550BP         | sEA | Taiwan   | ancient | 1550 | N.A. | 24.33 | 121.77 | N.A. | N.A. | Wang_C_et_al_2021 | PASS  |
| I14933 | Hanben_1550BP         | sEA | Taiwan   | ancient | 1550 | N.A. | 24.33 | 121.77 | N.A. | N.A. | Wang_C_et_al_2021 | PASS  |
| I14934 | Hanben_1550BP         | sEA | Taiwan   | ancient | 1550 | N.A. | 24.33 | 121.77 | N.A. | N.A. | Wang_C_et_al_2021 | PASS  |
| I8076  | Hanben_1550BP         | sEA | Taiwan   | ancient | 1550 | N.A. | 24.33 | 121.77 | N.A. | N.A. | Wang_C_et_al_2021 | PASS  |
| I14925 | Hanben_1550BP         | sEA | Taiwan   | ancient | 1550 | N.A. | 24.33 | 121.77 | N.A. | N.A. | Wang_C_et_al_2021 | imiss |
| I3614  | Hanben_1550BP         | sEA | Taiwan   | ancient | 1550 | N.A. | 24.33 | 121.77 | N.A. | N.A. | Wang_C_et_al_2021 | PASS  |
| I3728  | Hanben_1550BP         | sEA | Taiwan   | ancient | 1496 | N.A. | 24.33 | 121.77 | N.A. | N.A. | Wang_C_et_al_2021 | PASS  |
| I3619  | Hanben_1550BP         | sEA | Taiwan   | ancient | 1473 | N.A. | 24.33 | 121.77 | N.A. | N.A. | Wang_C_et_al_2021 | PASS  |
| I8075  | Hanben_1550BP         | sEA | Taiwan   | ancient | 1459 | N.A. | 24.33 | 121.77 | N.A. | N.A. | Wang_C_et_al_2021 | PASS  |
| I13695 | Hanben_1550BP         | sEA | Taiwan   | ancient | 1459 | N.A. | 24.33 | 121.77 | N.A. | N.A. | Wang_C_et_al_2021 | PASS  |
| I8081  | Hanben_1550BP         | sEA | Taiwan   | ancient | 1409 | N.A. | 24.33 | 121.77 | N.A. | N.A. | Wang_C_et_al_2021 | PASS  |
| I3732  | Hanben_1550BP         | sEA | Taiwan   | ancient | 1235 | N.A. | 24.33 | 121.77 | N.A. | N.A. | Wang_C_et_al_2021 | PASS  |
| I8072  | Hanben_1550BP         | sEA | Taiwan   | ancient | 1550 | N.A. | 24.33 | 121.77 | N.A. | N.A. | Wang_C_et_al_2021 | PASS  |
| I3734  | Hanben_1550BP         | sEA | Taiwan   | ancient | 1575 | N.A. | 24.33 | 121.77 | N.A. | N.A. | Wang_C_et_al_2021 | PASS  |
| I3735  | Hanben_1550BP         | sEA | Taiwan   | ancient | 1532 | N.A. | 24.33 | 121.77 | N.A. | N.A. | Wang_C_et_al_2021 | PASS  |
| I3612  | Hanben_1550BP         | sEA | Taiwan   | ancient | 1800 | N.A. | 24.33 | 121.77 | N.A. | N.A. | Wang_C_et_al_2021 | PASS  |
| I3611  | Hanben_1550BP         | sEA | Taiwan   | ancient | 1715 | N.A. | 24.33 | 121.77 | N.A. | N.A. | Wang_C_et_al_2021 | PASS  |
| I12973 | Mongolia_2500BP       | nEA | Mongolia | ancient | 3226 | N.A. | 49.41 | 102.69 | N.A. | N.A. | Wang_C_et_al_2021 | PASS  |
| I13174 | MongunTaiga_3350BP    | nEA | Mongolia | ancient | 3410 | N.A. | 47.07 | 91.83  | N.A. | N.A. | Wang_C_et_al_2021 | PASS  |
| I12976 | MongunTaiga_3350BP    | nEA | Mongolia | ancient | 3332 | N.A. | 49.36 | 88.71  | N.A. | N.A. | Wang_C_et_al_2021 | PASS  |
| I6363  | MongunTaiga_3050BP    | nEA | Mongolia | ancient | 3095 | N.A. | 45.35 | 90.85  | N.A. | N.A. | Wang_C_et_al_2021 | PASS  |
| I7033  | MongunTaiga_3050BP    | nEA | Mongolia | ancient | 3066 | N.A. | 49.96 | 92.05  | N.A. | N.A. | Wang_C_et_al_2021 | PASS  |
| I12955 | Munkhkhairkhan_3700BP | nEA | Mongolia | ancient | 3824 | N.A. | 49.7  | 96.8   | N.A. | N.A. | Wang_C_et_al_2021 | PASS  |
| I13173 | Munkhkhairkhan_3700BP | nEA | Mongolia | ancient | 3722 | N.A. | 47.07 | 91.83  | N.A. | N.A. | Wang_C_et_al_2021 | PASS  |
| I6348  | Munkhkhairkhan_3700BP | nEA | Mongolia | ancient | 3632 | N.A. | 49.39 | 102.7  | N.A. | N.A. | Wang_C_et_al_2021 | PASS  |
| I12958 | Munkhkhairkhan_3500BP | nEA | Mongolia | ancient | 3483 | N.A. | 47.07 | 91.83  | N.A. | N.A. | Wang_C_et_al_2021 | PASS  |
| I13964 | Ulaanzukh_3350BP      | nEA | Mongolia | ancient | 3350 | N.A. | 46.77 | 111.6  | N.A. | N.A. | Wang_C_et_al_2021 | PASS  |
| I12972 | Ulaanzukh_3350BP      | nEA | Mongolia | ancient | 3347 | N.A. | 46.77 | 111.6  | N.A. | N.A. | Wang_C_et_al_2021 | PASS  |
| I14037 | Ulaanzukh_3350BP      | nEA | Mongolia | ancient | 3306 | N.A. | 46.77 | 111.6  | N.A. | N.A. | Wang_C_et_al_2021 | PASS  |
| I13180 | Ulgii_4700BP          | nEA | Mongolia | ancient | 4862 | N.A. | 49.3  | 88.83  | N.A. | N.A. | Wang_C_et_al_2021 | PASS  |
| I12977 | Ulgii_4700BP          | nEA | Mongolia | ancient | 4822 | N.A. | 49.36 | 88.71  | N.A. | N.A. | Wang_C_et_al_2021 | PASS  |
| I6361  | Ulgii_4700BP          | nEA | Mongolia | ancient | 4483 | N.A. | 49.34 | 88.71  | N.A. | N.A. | Wang_C_et_al_2021 | PASS  |
| I6357  | SlabGrave_2850BP      | nEA | Mongolia | ancient | 2200 | N.A. | 47.7  | 106.4  | N.A. | N.A. | Wang_C_et_al_2021 | PASS  |
| I6364  | Mongolia_2500BP       | nEA | Mongolia | ancient | 2927 | N.A. | 45.39 | 90.8   | N.A. | N.A. | Wang_C_et_al_2021 | PASS  |
| I14194 | Mongolia_2500BP       | nEA | Mongolia | ancient | 2834 | N.A. | 46.77 | 111.6  | N.A. | N.A. | Wang_C_et_al_2021 | PASS  |
| I13504 | Mongolia_2500BP       | nEA | Mongolia | ancient | 2368 | N.A. | 50.7  | 99.2   | N.A. | N.A. | Wang_C_et_al_2021 | PASS  |
| I13965 | Mongolia_2500BP       | nEA | Mongolia | ancient | 2270 | N.A. | 48.68 | 88.38  | N.A. | N.A. | Wang_C_et_al_2021 | PASS  |
| I6263  | Pazyryk_2200BP        | nEA | Mongolia | ancient | 2221 | N.A. | 48.68 | 88.38  | N.A. | N.A. | Wang_C_et_al_2021 | PASS  |
| I6224  | Sagly_2250BP          | nEA | Mongolia | ancient | 2225 | N.A. | 49.96 | 92.05  | N.A. | N.A. | Wang_C_et_al_2021 | PASS  |
| I6232  | Sagly_2250BP          | nEA | Mongolia | ancient | 2239 | N.A. | 49.96 | 92.05  | N.A. | N.A. | Wang_C_et_al_2021 | PASS  |
| I12970 | Sagly_2250BP          | nEA | Mongolia | ancient | 2286 | N.A. | 49.96 | 92.05  | N.A. | N.A. | Wang_C_et_al_2021 | PASS  |
| I7029  | Sagly_2250BP          | nEA | Mongolia | ancient | 2225 | N.A. | 49.96 | 92.05  | N.A. | N.A. | Wang_C_et_al_2021 | PASS  |
| I7027  | Sagly_2250BP          | nEA | Mongolia | ancient | 2278 | N.A. | 49.96 | 92.05  | N.A. | N.A. | Wang_C_et_al_2021 | PASS  |

|                 |                     |     |          |         |       |      |       |        |      |      |                   |       |
|-----------------|---------------------|-----|----------|---------|-------|------|-------|--------|------|------|-------------------|-------|
| I6356           | Sagly_2250BP        | nEA | Mongolia | ancient | 2250  | N.A. | 49.96 | 92.05  | N.A. | N.A. | Wang_C_et_al_2021 | PASS  |
| I7030           | Sagly_2250BP        | nEA | Mongolia | ancient | 2244  | N.A. | 49.96 | 92.05  | N.A. | N.A. | Wang_C_et_al_2021 | PASS  |
| I7024           | Sagly_2250BP        | nEA | Mongolia | ancient | 2244  | N.A. | 49.96 | 92.05  | N.A. | N.A. | Wang_C_et_al_2021 | PASS  |
| I7022           | Sagly_2250BP        | nEA | Mongolia | ancient | 2244  | N.A. | 49.96 | 92.05  | N.A. | N.A. | Wang_C_et_al_2021 | PASS  |
| I7023           | Sagly_2250BP        | nEA | Mongolia | ancient | 2226  | N.A. | 49.96 | 92.05  | N.A. | N.A. | Wang_C_et_al_2021 | PASS  |
| I6233           | Sagly_2250BP        | nEA | Mongolia | ancient | 2225  | N.A. | 49.96 | 92.05  | N.A. | N.A. | Wang_C_et_al_2021 | PASS  |
| I6226           | Sagly_2250BP        | nEA | Mongolia | ancient | 2220  | N.A. | 49.96 | 92.05  | N.A. | N.A. | Wang_C_et_al_2021 | PASS  |
| I12960          | SlabGrave_2850 BP   | nEA | Mongolia | ancient | 3332  | N.A. | 46.92 | 102.76 | N.A. | N.A. | Wang_C_et_al_2021 | PASS  |
| I12969          | SlabGrave_2850 BP   | nEA | Mongolia | ancient | 3001  | N.A. | 47.18 | 109.19 | N.A. | N.A. | Wang_C_et_al_2021 | PASS  |
| I6352           | SlabGrave_2850 BP   | nEA | Mongolia | ancient | 2949  | N.A. | 46.9  | 102.77 | N.A. | N.A. | Wang_C_et_al_2021 | PASS  |
| I7032           | SlabGrave_2850 BP   | nEA | Mongolia | ancient | 2849  | N.A. | 48.69 | 110.19 | N.A. | N.A. | Wang_C_et_al_2021 | PASS  |
| I12971          | SlabGrave_2850 BP   | nEA | Mongolia | ancient | 2849  | N.A. | 49.15 | 114.87 | N.A. | N.A. | Wang_C_et_al_2021 | PASS  |
| I13963          | SlabGrave_2850 BP   | nEA | Mongolia | ancient | 2829  | N.A. | 47.19 | 109.19 | N.A. | N.A. | Wang_C_et_al_2021 | PASS  |
| I6349           | SlabGrave_2850 BP   | nEA | Mongolia | ancient | 2781  | N.A. | 45.3  | 113.85 | N.A. | N.A. | Wang_C_et_al_2021 | PASS  |
| I6365           | SlabGrave_2850 BP   | nEA | Mongolia | ancient | 2744  | N.A. | 49.66 | 99.93  | N.A. | N.A. | Wang_C_et_al_2021 | PASS  |
| I6359           | SlabGrave_2850 BP   | nEA | Mongolia | ancient | 2700  | N.A. | 50.12 | 100.05 | N.A. | N.A. | Wang_C_et_al_2021 | PASS  |
| I6369           | SlabGrave_2850 BP   | nEA | Mongolia | ancient | 2554  | N.A. | 47.38 | 110.32 | N.A. | N.A. | Wang_C_et_al_2021 | PASS  |
| I13175          | Xianbei_1500BP      | nEA | Mongolia | ancient | 1483  | N.A. | 45.39 | 90.8   | N.A. | N.A. | Wang_C_et_al_2021 | PASS  |
| I6228           | Xiongnu_1900BP      | nEA | Mongolia | ancient | 1919  | N.A. | 49.96 | 92.05  | N.A. | N.A. | Wang_C_et_al_2021 | PASS  |
| I1202           | Yankovsky_2850 BP   | nEA | Russia   | ancient | 2850  | N.A. | 43.06 | 131.89 | N.A. | N.A. | Wang_C_et_al_2021 | PASS  |
| I3358           | Heishui_Mohe_7 50BP | nEA | Russia   | ancient | 769   | N.A. | 45.91 | 134.88 | N.A. | N.A. | Wang_C_et_al_2021 | PASS  |
| I12974          | Mongolia_650BP      | nEA | Mongolia | ancient | 682   | N.A. | 47.38 | 110.32 | N.A. | N.A. | Wang_C_et_al_2021 | PASS  |
| I13961          | Mongolia_650BP      | nEA | Mongolia | ancient | 609   | N.A. | 46.15 | 114.87 | N.A. | N.A. | Wang_C_et_al_2021 | PASS  |
| I13176          | Mongolia_1000BP     | nEA | Mongolia | ancient | 1011  | N.A. | 45.35 | 90.85  | N.A. | N.A. | Wang_C_et_al_2021 | PASS  |
| Qihe3           | Qihe_11550BP        | sEA | China    | ancient | 11552 | N.A. | 25.4  | 117.6  | N.A. | N.A. | Wang_T_et_al_2021 | PASS  |
| Longlin_1       | Longlin_10550BP     | sEA | China    | ancient | 10563 | N.A. | 24.64 | 105.17 | N.A. | N.A. | Wang_T_et_al_2021 | PASS  |
| Dushan4_1       | Dushan_8800BP       | sEA | China    | ancient | 8784  | N.A. | 23.6  | 107.13 | N.A. | N.A. | Wang_T_et_al_2021 | PASS  |
| Baojianshan5_M2 | Baojianshan_735 0BP | sEA | China    | ancient | 7368  | N.A. | 22.34 | 106.85 | N.A. | N.A. | Wang_T_et_al_2021 | PASS  |
| Baojianshan5_M1 | Baojianshan_735 0BP | sEA | China    | ancient | 7368  | N.A. | 22.34 | 106.85 | N.A. | N.A. | Wang_T_et_al_2021 | PASS  |
| BalongKD07      | BaBanQinCen_1 550BP | sEA | China    | ancient | 1552  | N.A. | 24.15 | 107.51 | N.A. | N.A. | Wang_T_et_al_2021 | PASS  |
| BalongKD10      | BaBanQinCen_1 500BP | sEA | China    | ancient | 1489  | N.A. | 24.15 | 107.51 | N.A. | N.A. | Wang_T_et_al_2021 | PASS  |
| QinchangKD14    | BaBanQinCen_1 500BP | sEA | China    | ancient | 1476  | N.A. | 24.1  | 107.51 | N.A. | N.A. | Wang_T_et_al_2021 | PASS  |
| QinchangKD13    | BaBanQinCen_1 500BP | sEA | China    | ancient | 1442  | N.A. | 24.1  | 107.51 | N.A. | N.A. | Wang_T_et_al_2021 | PASS  |
| BandaKD15       | BaBanQinCen_1 500BP | sEA | China    | ancient | 1435  | N.A. | 24.05 | 107.5  | N.A. | N.A. | Wang_T_et_al_2021 | PASS  |
| CenxunKP05      | BaBanQinCen_1 500BP | sEA | China    | ancient | 1387  | N.A. | 23.4  | 107.4  | N.A. | N.A. | Wang_T_et_al_2021 | PASS  |
| BandaKD11       | BaBanQinCen_1 500BP | sEA | China    | ancient | 1387  | N.A. | 24.05 | 107.5  | N.A. | N.A. | Wang_T_et_al_2021 | PASS  |
| BalongKD06      | BaBanQinCen_1 500BP | sEA | China    | ancient | 1500  | N.A. | 24.15 | 107.51 | N.A. | N.A. | Wang_T_et_al_2021 | imiss |
| BalongKD08      | BaBanQinCen_1 500BP | sEA | China    | ancient | 1500  | N.A. | 24.15 | 107.51 | N.A. | N.A. | Wang_T_et_al_2021 | imiss |
| CenxunKP13      | LaCen_1350BP        | sEA | China    | ancient | 1411  | N.A. | 23.4  | 107.4  | N.A. | N.A. | Wang_T_et_al_2021 | PASS  |
| LadaKH01        | LaCen_1350BP        | sEA | China    | ancient | 1388  | N.A. | 24    | 107.6  | N.A. | N.A. | Wang_T_et_al_2021 | PASS  |
| CenxunKP07      | LaCen_1350BP        | sEA | China    | ancient | 1330  | N.A. | 23.4  | 107.4  | N.A. | N.A. | Wang_T_et_al_2021 | PASS  |
| LayiKD01        | Layi_1450BP         | sEA | China    | ancient | 1468  | N.A. | 24.08 | 107.62 | N.A. | N.A. | Wang_T_et_al_2021 | PASS  |
| ShenxianKP09    | Shenxian_1300BP     | sEA | China    | ancient | 1315  | N.A. | 23.31 | 107.59 | N.A. | N.A. | Wang_T_et_al_2021 | PASS  |
| YiyangKP17      | Yiyang_1350BP       | sEA | China    | ancient | 1387  | N.A. | 23.33 | 107.5  | N.A. | N.A. | Wang_T_et_al_2021 | PASS  |

|              |                        |      |           |         |      |      |       |        |      |      |                   |       |
|--------------|------------------------|------|-----------|---------|------|------|-------|--------|------|------|-------------------|-------|
| HuatuyanNL06 | GaoHuaHua_450BP        | sEA  | China     | ancient | 500  | N.A. | 25.1  | 107.66 | N.A. | N.A. | Wang_T_et_al_2021 | PASS  |
| HuatuyanNL18 | GaoHuaHua_450BP        | sEA  | China     | ancient | 500  | N.A. | 25.1  | 107.66 | N.A. | N.A. | Wang_T_et_al_2021 | PASS  |
| HuatuyanNL04 | GaoHuaHua_450BP        | sEA  | China     | ancient | 500  | N.A. | 25.1  | 107.66 | N.A. | N.A. | Wang_T_et_al_2021 | imiss |
| Yinwang      | GaoHuaHua_450BP        | sEA  | China     | ancient | 500  | N.A. | 23.82 | 107.52 | N.A. | N.A. | Wang_T_et_al_2021 | imiss |
| HuatuyanNL11 | GaoHuaHua_450BP        | sEA  | China     | ancient | 446  | N.A. | 25.1  | 107.66 | N.A. | N.A. | Wang_T_et_al_2021 | PASS  |
| HuatuyanNL17 | GaoHuaHua_450BP        | sEA  | China     | ancient | 434  | N.A. | 25.1  | 107.66 | N.A. | N.A. | Wang_T_et_al_2021 | PASS  |
| GaofengNL23  | GaoHuaHua_450BP        | sEA  | China     | ancient | 421  | N.A. | 25.11 | 107.7  | N.A. | N.A. | Wang_T_et_al_2021 | imiss |
| HuaqiaoNL26  | GaoHuaHua_450BP        | sEA  | China     | ancient | 419  | N.A. | 25.11 | 107.66 | N.A. | N.A. | Wang_T_et_al_2021 | PASS  |
| HuatuyanNL21 | GaoHuaHua_450BP        | sEA  | China     | ancient | 405  | N.A. | 25.1  | 107.66 | N.A. | N.A. | Wang_T_et_al_2021 | PASS  |
| HuatuyanNL02 | GaoHuaHua_450BP        | sEA  | China     | ancient | 386  | N.A. | 25.1  | 107.66 | N.A. | N.A. | Wang_T_et_al_2021 | PASS  |
| HuatuyanNL19 | GaoHuaHua_450BP        | sEA  | China     | ancient | 375  | N.A. | 25.1  | 107.66 | N.A. | N.A. | Wang_T_et_al_2021 | PASS  |
| La368        | PhaFaen_7000BP         | MSEA | Laos      | ancient | 7040 | N.A. | 18.55 | 103.52 | N.A. | N.A. | McColl_et_al_2018 | PASS  |
| Ma911        | GuaChaCave_3900BP      | MSEA | Malaysia  | ancient | 3872 | N.A. | 5.15  | 101.69 | N.A. | N.A. | McColl_et_al_2018 | PASS  |
| Ma912        | GuaChaCave_2400BP      | MSEA | Malaysia  | ancient | 2409 | N.A. | 5.15  | 101.69 | N.A. | N.A. | McColl_et_al_2018 | PASS  |
| I0627        | ManBac_3800BP          | MSEA | Vietnam   | ancient | 3963 | N.A. | 20.54 | 106.41 | N.A. | N.A. | Lipson_et_al_2018 | PASS  |
| I1137        | ManBac_3800BP          | MSEA | Vietnam   | ancient | 3763 | N.A. | 20.54 | 106.41 | N.A. | N.A. | Lipson_et_al_2018 | PASS  |
| I1859        | ManBac_3800BP          | MSEA | Vietnam   | ancient | 3765 | N.A. | 20.54 | 106.41 | N.A. | N.A. | Lipson_et_al_2018 | PASS  |
| I2731        | ManBac_3800BP          | MSEA | Vietnam   | ancient | 3718 | N.A. | 20.54 | 106.41 | N.A. | N.A. | Lipson_et_al_2018 | PASS  |
| I2947_new    | ManBac_3800BP          | MSEA | Vietnam   | ancient | 3750 | N.A. | 20.54 | 106.41 | N.A. | N.A. | Lipson_et_al_2018 | PASS  |
| Vt778        | NamTun_2550BP          | MSEA | Vietnam   | ancient | 2549 | N.A. | 22.42 | 102.32 | N.A. | N.A. | McColl_et_al_2018 | PASS  |
| Vt777        | MaiDaDieu_2300BP       | MSEA | Vietnam   | ancient | 2275 | N.A. | 20.13 | 105.32 | N.A. | N.A. | McColl_et_al_2018 | PASS  |
| Vt833        | MaiDaDieu_3800BP       | MSEA | Vietnam   | ancient | 3788 | N.A. | 20.13 | 105.32 | N.A. | N.A. | McColl_et_al_2018 | PASS  |
| Vt880        | HonHaiCoTien_4000BP    | MSEA | Vietnam   | ancient | 4000 | N.A. | 21.4  | 107.47 | N.A. | N.A. | McColl_et_al_2018 | PASS  |
| La364        | TamPaLing_2850BP       | MSEA | Laos      | ancient | 2865 | N.A. | 20.77 | 104.01 | N.A. | N.A. | McColl_et_al_2018 | PASS  |
| La727        | TamHang_2200BP         | MSEA | Laos      | ancient | 2320 | N.A. | 20.77 | 104.01 | N.A. | N.A. | McColl_et_al_2018 | PASS  |
| La898        | TamHang_2200BP         | MSEA | Laos      | ancient | 2000 | N.A. | 20.77 | 104.01 | N.A. | N.A. | McColl_et_al_2018 | PASS  |
| I4011_new    | Oakaie_2950BP          | MSEA | Myanmar   | ancient | 2950 | N.A. | 22.76 | 95.39  | N.A. | N.A. | Lipson_et_al_2018 | PASS  |
| In661        | LoyangUjungCave_2000BP | MSEA | Indonesia | ancient | 1917 | N.A. | 3.85  | 96.47  | N.A. | N.A. | McColl_et_al_2018 | PASS  |
| In662        | LoyangUjungCave_2000BP | MSEA | Indonesia | ancient | 2152 | N.A. | 3.85  | 96.47  | N.A. | N.A. | McColl_et_al_2018 | PASS  |
| Vt779        | NuiNap_2200BP          | MSEA | Vietnam   | ancient | 2242 | N.A. | 19.98 | 105.69 | N.A. | N.A. | McColl_et_al_2018 | PASS  |
| Vt781        | NuiNap_2200BP          | MSEA | Vietnam   | ancient | 2248 | N.A. | 19.98 | 105.69 | N.A. | N.A. | McColl_et_al_2018 | PASS  |
| Vt796        | NuiNap_2200BP          | MSEA | Vietnam   | ancient | 2143 | N.A. | 19.98 | 105.69 | N.A. | N.A. | McColl_et_al_2018 | PASS  |
| Vt808        | NuiNap_2200BP          | MSEA | Vietnam   | ancient | 2255 | N.A. | 19.98 | 105.69 | N.A. | N.A. | McColl_et_al_2018 | PASS  |
| I2497        | NuiNap_2200BP          | MSEA | Vietnam   | ancient | 2000 | N.A. | 19.98 | 105.69 | N.A. | N.A. | Lipson_et_al_2018 | PASS  |
| I2948_new    | NuiNap_1950BP          | MSEA | Vietnam   | ancient | 1948 | N.A. | 19.98 | 105.69 | N.A. | N.A. | Lipson_et_al_2018 | PASS  |
| I1680_new    | VatKomnou_1800BP       | MSEA | Cambodia  | ancient | 1810 | N.A. | 10.98 | 104.97 | N.A. | N.A. | Lipson_et_al_2018 | PASS  |
| Th519        | LongLongRak_1750BP     | MSEA | Thailand  | ancient | 1792 | N.A. | 19.55 | 98.27  | N.A. | N.A. | McColl_et_al_2018 | PASS  |
| Th521        | LongLongRak_1750BP     | MSEA | Thailand  | ancient | 1785 | N.A. | 19.55 | 98.27  | N.A. | N.A. | McColl_et_al_2018 | PASS  |
| Th530        | LongLongRak_1750BP     | MSEA | Thailand  | ancient | 1756 | N.A. | 19.55 | 98.27  | N.A. | N.A. | McColl_et_al_2018 | PASS  |
| Th531        | LongLongRak_1750BP     | MSEA | Thailand  | ancient | 1687 | N.A. | 19.55 | 98.27  | N.A. | N.A. | McColl_et_al_2018 | PASS  |
| Th703        | LongLongRak_1750BP     | MSEA | Thailand  | ancient | 1758 | N.A. | 19.55 | 98.27  | N.A. | N.A. | McColl_et_al_2018 | PASS  |
| Vt719        | HonHaiCoTien_200BP     | MSEA | Vietnam   | ancient | 223  | N.A. | 21.4  | 107.47 | N.A. | N.A. | McColl_et_al_2018 | PASS  |
| Ma554        | SupuHujung_400BP       | MSEA | Malaysia  | ancient | 383  | N.A. | 6.7   | 116.8  | N.A. | N.A. | McColl_et_al_2018 | PASS  |
| Ma555        | Kinabatangan_300BP     | MSEA | Malaysia  | ancient | 299  | N.A. | 5.08  | 117.87 | N.A. | N.A. | McColl_et_al_2018 | PASS  |

|                     |                        |         |                  |         |      |      |        |         |      |      |                     |       |
|---------------------|------------------------|---------|------------------|---------|------|------|--------|---------|------|------|---------------------|-------|
| LIA001002.TF1.1     | Liang_Bua_2600BP       | ISEA    | Indonesia        | ancient | 2600 | N.A. | -8.53  | 120.44  | N.A. | N.A. | Oliveira_et_al_2021 | PASS  |
| TanjungPinang1.TF   | Tanjung_Pinang_2100BP  | ISEA    | Indonesia        | ancient | 2100 | N.A. | 2      | 128.42  | N.A. | N.A. | Oliveira_et_al_2021 | PASS  |
| TanjungPinang2.TF   | Tanjung_Pinang_2100BP  | ISEA    | Indonesia        | ancient | 2100 | N.A. | 2      | 128.42  | N.A. | N.A. | Oliveira_et_al_2021 | PASS  |
| TanjungPinang4.TF   | Tanjung_Pinang_2100BP  | ISEA    | Indonesia        | ancient | 2100 | N.A. | 2      | 128.42  | N.A. | N.A. | Oliveira_et_al_2021 | PASS  |
| TanjungPinang6.TF   | Tanjung_Pinang_2100BP  | ISEA    | Indonesia        | ancient | 2100 | N.A. | 2      | 128.42  | N.A. | N.A. | Oliveira_et_al_2021 | PASS  |
| Uattamdi1.TF        | Uattamdi_1900BP        | ISEA    | Indonesia        | ancient | 1900 | N.A. | 0.05   | 127.41  | N.A. | N.A. | Oliveira_et_al_2021 | PASS  |
| AMA001.B0101.TF1.1  | Aru_Manara_2150BP      | ISEA    | Indonesia        | ancient | 2150 | N.A. | 2.3    | 128.8   | N.A. | N.A. | Oliveira_et_al_2021 | PASS  |
| AMA0038.A0101.TF1.1 | Aru_Manara_2150BP      | ISEA    | Indonesia        | ancient | 2150 | N.A. | 2.3    | 128.8   | N.A. | N.A. | Oliveira_et_al_2021 | PASS  |
| AMA004.AB0101.TF1.1 | Aru_Manara_2150BP      | ISEA    | Indonesia        | ancient | 2150 | N.A. | 2.3    | 128.8   | N.A. | N.A. | Oliveira_et_al_2021 | PASS  |
| AMA005.A0101.TF1.1  | Aru_Manara_2150BP      | ISEA    | Indonesia        | ancient | 2150 | N.A. | 2.3    | 128.8   | N.A. | N.A. | Oliveira_et_al_2021 | PASS  |
| AMA009.AB0101.TF1.1 | Aru_Manara_950BP       | ISEA    | Indonesia        | ancient | 950  | N.A. | 2.3    | 128.8   | N.A. | N.A. | Oliveira_et_al_2021 | PASS  |
| TOP002.A0101.TF1.1  | Topogaro_250BP         | ISEA    | Indonesia        | ancient | 250  | N.A. | -2.2   | 121.66  | N.A. | N.A. | Oliveira_et_al_2021 | PASS  |
| TOP004.A0101.TF1.1  | Topogaro_250BP         | ISEA    | Indonesia        | ancient | 250  | N.A. | -2.2   | 121.66  | N.A. | N.A. | Oliveira_et_al_2021 | PASS  |
| JAB001.A0101.TF1.1  | Jareng_Bori_450BP      | ISEA    | Indonesia        | ancient | 450  | N.A. | -8.42  | 124.12  | N.A. | N.A. | Oliveira_et_al_2021 | PASS  |
| KMO001.A0101.TF1.1  | Komodo_750BP           | ISEA    | Indonesia        | ancient | 750  | N.A. | -8.6   | 119.44  | N.A. | N.A. | Oliveira_et_al_2021 | PASS  |
| LIT001.A0101.TF1.1  | Liang_Toge_850BP       | ISEA    | Indonesia        | ancient | 850  | N.A. | -8.65  | 120.99  | N.A. | N.A. | Oliveira_et_al_2021 | PASS  |
| Lapita_I1368        | Vanuatu_2900BP         | Oceania | Vanuatu          | ancient | 2983 | N.A. | -17.79 | 168.37  | N.A. | N.A. | Skoglund_et_al_2016 | PASS  |
| Lapita_I1369        | Vanuatu_2900BP         | Oceania | Vanuatu          | ancient | 3045 | N.A. | -17.79 | 168.37  | N.A. | N.A. | Skoglund_et_al_2016 | PASS  |
| Lapita_I1370        | Vanuatu_2900BP         | Oceania | Vanuatu          | ancient | 3083 | N.A. | -17.79 | 168.37  | N.A. | N.A. | Skoglund_et_al_2016 | PASS  |
| Lapita_Sk10         | Tonga_2600BP           | Oceania | Tonga            | ancient | 2594 | N.A. | -21.18 | -175.12 | N.A. | N.A. | Skoglund_et_al_2016 | PASS  |
| TON001              | Tonga_2600BP           | Oceania | Tonga            | ancient | 2625 | N.A. | -21.18 | 175.11  | N.A. | N.A. | Posth_et_al_2018    | PASS  |
| TON002              | Tonga_2600BP           | Oceania | Tonga            | ancient | 2625 | N.A. | -21.18 | 175.11  | N.A. | N.A. | Posth_et_al_2018    | PASS  |
| MAL006              | Vanuatu_2400BP         | Oceania | Vanuatu          | ancient | 2665 | N.A. | -16.07 | 167.45  | N.A. | N.A. | Posth_et_al_2018    | imiss |
| MAL004              | Vanuatu_2400BP         | Oceania | Vanuatu          | ancient | 2567 | N.A. | -16.07 | 167.45  | N.A. | N.A. | Posth_et_al_2018    | PASS  |
| MAL002              | Vanuatu_2400BP         | Oceania | Vanuatu          | ancient | 2525 | N.A. | -16.07 | 167.45  | N.A. | N.A. | Posth_et_al_2018    | PASS  |
| TAN002              | Vanuatu_2400BP         | Oceania | Vanuatu          | ancient | 2490 | N.A. | -19.33 | 169.34  | N.A. | N.A. | Posth_et_al_2018    | PASS  |
| MAL001              | Vanuatu_2400BP         | Oceania | Vanuatu          | ancient | 2240 | N.A. | -15.9  | 167.3   | N.A. | N.A. | Posth_et_al_2018    | PASS  |
| MAL008              | Vanuatu_2400BP         | Oceania | Vanuatu          | ancient | 2238 | N.A. | -16.07 | 167.45  | N.A. | N.A. | Posth_et_al_2018    | imiss |
| MAL007              | Vanuatu_2400BP         | Oceania | Vanuatu          | ancient | 2038 | N.A. | -16.07 | 167.45  | N.A. | N.A. | Posth_et_al_2018    | PASS  |
| FUT002              | Vanuatu_1200BP         | Oceania | Vanuatu          | ancient | 1238 | N.A. | -19.52 | 170.23  | N.A. | N.A. | Posth_et_al_2018    | PASS  |
| FUT006              | Vanuatu_1200BP         | Oceania | Vanuatu          | ancient | 1209 | N.A. | -19.52 | 170.23  | N.A. | N.A. | Posth_et_al_2018    | PASS  |
| FUT007              | Vanuatu_1200BP         | Oceania | Vanuatu          | ancient | 1204 | N.A. | -19.52 | 170.23  | N.A. | N.A. | Posth_et_al_2018    | PASS  |
| FUT001              | Vanuatu_1200BP         | Oceania | Vanuatu          | ancient | 1159 | N.A. | -19.52 | 170.23  | N.A. | N.A. | Posth_et_al_2018    | PASS  |
| LHA001              | Tonga_800BP            | Oceania | Tonga            | ancient | 844  | N.A. | -21.18 | -175.12 | N.A. | N.A. | Posth_et_al_2018    | PASS  |
| MAI002              | Solomon_Islands_500BP  | Oceania | Solomon_Islands  | ancient | 467  | N.A. | -9.25  | 161.22  | N.A. | N.A. | Posth_et_al_2018    | PASS  |
| TAP003              | French_Polynesia_400BP | Oceania | French_Polynesia | ancient | 366  | N.A. | -16.84 | -151.36 | N.A. | N.A. | Posth_et_al_2018    | PASS  |
| TAP004              | French_Polynesia_200BP | Oceania | French_Polynesia | ancient | 228  | N.A. | -16.84 | -151.36 | N.A. | N.A. | Posth_et_al_2018    | PASS  |
| TAP002              | French_Polynesia_200BP | Oceania | French_Polynesia | ancient | 203  | N.A. | -16.84 | -151.36 | N.A. | N.A. | Posth_et_al_2018    | PASS  |
| TAN001              | Vanuatu_300BP          | Oceania | Vanuatu          | ancient | 202  | N.A. | -19.56 | 169.28  | N.A. | N.A. | Posth_et_al_2018    | PASS  |
| I1370               | Vanuatu_2900BP         | Oceania | Vanuatu          | ancient | 2945 | N.A. | -17.79 | 168.37  | N.A. | N.A. | Lipson_et_al_2018_b | imiss |
| I1369               | Vanuatu_2900BP         | Oceania | Vanuatu          | ancient | 2885 | N.A. | -17.79 | 168.37  | N.A. | N.A. | Lipson_et_al_2018_b | imiss |
| I1368               | Vanuatu_2900BP         | Oceania | Vanuatu          | ancient | 2870 | N.A. | -17.79 | 168.37  | N.A. | N.A. | Lipson_et_al_2018_b | imiss |
| I5951               | Vanuatu_2900BP         | Oceania | Vanuatu          | ancient | 2820 | N.A. | -17.79 | 168.37  | N.A. | N.A. | Lipson_et_al_2018_b | PASS  |
| I4451               | Vanuatu_2400BP         | Oceania | Vanuatu          | ancient | 2260 | N.A. | -17.69 | 168.29  | N.A. | N.A. | Lipson_et_al_2018_b | PASS  |

|                        |                          |          |              |         |       |      |           |           |      |      |                           |              |
|------------------------|--------------------------|----------|--------------|---------|-------|------|-----------|-----------|------|------|---------------------------|--------------|
| I3921                  | Vanuatu_1200BP           | Oceania  | Vanuatu      | ancient | 1260  | N.A. | -16.71    | 168.13    | N.A. | N.A. | Lipson_et_al_2018_b       | PASS         |
| I5259_published        | Vanuatu_300BP            | Oceania  | Vanuatu      | ancient | 480   | N.A. | -17.64    | 168.21    | N.A. | N.A. | Lipson_et_al_2018_b       | PASS         |
| I4450                  | Vanuatu_300BP            | Oceania  | Vanuatu      | ancient | 215   | N.A. | -17.68    | 168.53    | N.A. | N.A. | Lipson_et_al_2018_b       | PASS         |
| I4105                  | Vanuatu_300BP            | Oceania  | Vanuatu      | ancient | 150   | N.A. | -16.89    | 168.3     | N.A. | N.A. | Lipson_et_al_2018_b       | PASS         |
| I4419                  | Vanuatu_300BP            | Oceania  | Vanuatu      | ancient | 140   | N.A. | -17.8     | 168.52    | N.A. | N.A. | Lipson_et_al_2018_b       | PASS         |
| I4424                  | Vanuatu_300BP            | Oceania  | Vanuatu      | ancient | 140   | N.A. | -17.77    | 168.29    | N.A. | N.A. | Lipson_et_al_2018_b       | PASS         |
| I4106                  | Vanuatu_300BP            | Oceania  | Vanuatu      | ancient | 140   | N.A. | -16.89    | 168.3     | N.A. | N.A. | Lipson_et_al_2018_b       | PASS         |
| I4425                  | Vanuatu_300BP            | Oceania  | Vanuatu      | ancient | 135   | N.A. | -17.65    | 168.4     | N.A. | N.A. | Lipson_et_al_2018_b       | PASS         |
| I5265                  | Vanuatu_2900BP           | Oceania  | Vanuatu      | ancient | 2875  | N.A. | -17.79    | 168.39    | N.A. | N.A. | Lipson_et_al_2020         | imiss        |
| I5266                  | Vanuatu_2900BP           | Oceania  | Vanuatu      | ancient | 2875  | N.A. | -17.79    | 168.39    | N.A. | N.A. | Lipson_et_al_2020         | PASS         |
| I5268                  | Vanuatu_2900BP           | Oceania  | Vanuatu      | ancient | 2995  | N.A. | -17.79    | 168.39    | N.A. | N.A. | Lipson_et_al_2020         | imiss        |
| I5267                  | Vanuatu_2900BP           | Oceania  | Vanuatu      | ancient | 3050  | N.A. | -17.79    | 168.39    | N.A. | N.A. | Lipson_et_al_2020         | imiss        |
| I6188                  | Vanuatu_2400BP           | Oceania  | Vanuatu      | ancient | 2400  | N.A. | -17.7     | 168.27    | N.A. | N.A. | Lipson_et_al_2020         | imiss        |
| I14493                 | Vanuatu_300BP            | Oceania  | Vanuatu      | ancient | 350   | N.A. | -17.64    | 168.15    | N.A. | N.A. | Lipson_et_al_2020         | PASS         |
| I10969                 | Vanuatu_300BP            | Oceania  | Vanuatu      | ancient | 350   | N.A. | -17.64    | 168.15    | N.A. | N.A. | Lipson_et_al_2020         | PASS         |
| I10968                 | Vanuatu_300BP            | Oceania  | Vanuatu      | ancient | 350   | N.A. | -17.64    | 168.15    | N.A. | N.A. | Lipson_et_al_2020         | PASS         |
| I10967                 | Vanuatu_300BP            | Oceania  | Vanuatu      | ancient | 180   | N.A. | -17.64    | 168.2     | N.A. | N.A. | Lipson_et_al_2020         | PASS         |
| I10966                 | Vanuatu_300BP            | Oceania  | Vanuatu      | ancient | 350   | N.A. | -17.64    | 168.2     | N.A. | N.A. | Lipson_et_al_2020         | PASS         |
| EFE005                 | Vanuatu_300BP            | Oceania  | Vanuatu      | ancient | 234   | N.A. | -17.81    | 168.52    | N.A. | N.A. | Lipson_et_al_2020         | PASS         |
| SP4210.all             | Guam_2200BP              | Oceania  | US           | ancient | 2200  | N.A. | 13.62     | 144.87    | N.A. | N.A. | Pugach_et_al_2021         | PASS         |
| SP4211.all             | Guam_2200BP              | Oceania  | US           | ancient | 2200  | N.A. | 13.62     | 144.87    | N.A. | N.A. | Pugach_et_al_2021         | PASS         |
| mota.SG                | Mota_4470BP              | Africa   | Ethiopia     | ancient | 4470  | N.A. | 6.797495  | 38.207852 | N.A. | N.A. | Llorente_et_al_2015       | PASS (qpAdm) |
| Ust_Ishim_published.DG | Ust_Ishim_44350BP        | nEA      | Russia       | ancient | 44366 | N.A. | 57.7      | 71.1      | N.A. | N.A. | Fu_et_al_2014             | PASS (qpAdm) |
| Kostenki14.SG          | Kostenki_38050BP         | nEA      | Russia       | ancient | 38052 | N.A. | 51.23     | 39.3      | N.A. | N.A. | Seguin-Orlando_et_al_2014 | PASS (qpAdm) |
| I1290                  | Iran_10000BP             | WestAsia | Iran         | ancient | 9806  | N.A. | 34.45     | 48.116    | N.A. | N.A. | Lazaridis_et_al_2016      | PASS (qpAdm) |
| I1944                  | Iran_10000BP             | WestAsia | Iran         | ancient | 9800  | N.A. | 34.45     | 48.116    | N.A. | N.A. | Narasimhan_et_al_2019     | PASS (qpAdm) |
| I1945                  | Iran_10000BP             | WestAsia | Iran         | ancient | 9800  | N.A. | 34.45     | 48.116    | N.A. | N.A. | Narasimhan_et_al_2019     | PASS (qpAdm) |
| I1947                  | Iran_10000BP             | WestAsia | Iran         | ancient | 9992  | N.A. | 34.45     | 48.116    | N.A. | N.A. | Narasimhan_et_al_2019     | PASS (qpAdm) |
| I1949                  | Iran_10000BP             | WestAsia | Iran         | ancient | 10042 | N.A. | 34.45     | 48.116    | N.A. | N.A. | Narasimhan_et_al_2019     | PASS (qpAdm) |
| I1954                  | Iran_10000BP             | WestAsia | Iran         | ancient | 10162 | N.A. | 34.45     | 48.116    | N.A. | N.A. | Narasimhan_et_al_2019     | PASS (qpAdm) |
| I1951                  | Iran_10000BP             | WestAsia | Iran         | ancient | 9848  | N.A. | 34.45     | 48.116    | N.A. | N.A. | Narasimhan_et_al_2019     | PASS (qpAdm) |
| I7527                  | Iran_10000BP             | WestAsia | Iran         | ancient | 9900  | N.A. | 34.45     | 48.116    | N.A. | N.A. | Narasimhan_et_al_2019     | PASS (qpAdm) |
| Yana_old.SG            | Yana_31850BP             | nEA      | Russia       | ancient | 31850 | N.A. | 70.72     | 135.42    | N.A. | N.A. | Sikora_et_al_2019         | PASS (qpAdm) |
| I0061.SG               | Karelia_8450BP           | nEA      | Russia       | ancient | 8450  | N.A. | 61.65     | 35.65     | N.A. | N.A. | Fu_et_al_2016             | PASS (qpAdm) |
| I2123                  | Indus_Periphery_4500BP   | WestAsia | Turkmenistan | ancient | 4211  | N.A. | 38.21228  | 62.03443  | N.A. | N.A. | Narasimhan_et_al_2019     | PASS (qpAdm) |
| I11456_published       | Indus_Periphery_4500BP   | WestAsia | Iran         | ancient | 4500  | N.A. | 30.649857 | 61.400311 | N.A. | N.A. | Narasimhan_et_al_2019     | PASS (qpAdm) |
| I11459_published       | Indus_Periphery_4500BP   | WestAsia | Iran         | ancient | 4699  | N.A. | 30.649857 | 61.400311 | N.A. | N.A. | Narasimhan_et_al_2019     | PASS (qpAdm) |
| I11466_published       | Indus_Periphery_4500BP   | WestAsia | Iran         | ancient | 4200  | N.A. | 30.649857 | 61.400311 | N.A. | N.A. | Narasimhan_et_al_2019     | PASS (qpAdm) |
| I8726                  | Indus_Periphery_4500BP   | WestAsia | Iran         | ancient | 5000  | N.A. | 30.649857 | 61.400311 | N.A. | N.A. | Narasimhan_et_al_2019     | PASS (qpAdm) |
| I8728_published        | Indus_Periphery_4500BP   | WestAsia | Iran         | ancient | 4500  | N.A. | 30.649857 | 61.400311 | N.A. | N.A. | Narasimhan_et_al_2019     | PASS (qpAdm) |
| I11458_published       | Indus_Periphery_4500BP   | WestAsia | Iran         | ancient | 4600  | N.A. | 30.649857 | 61.400311 | N.A. | N.A. | Narasimhan_et_al_2019     | imiss        |
| USR1.SG                | Upward_Sun_River_11400BP | America  | US           | ancient | 11425 | N.A. | 64.22     | -145.7    | N.A. | N.A. | Moreno-Mayar_et_al_2017   | PASS (qpAdm) |



|                 |                |     |        |         |      |      |           |           |      |      |                     |              |
|-----------------|----------------|-----|--------|---------|------|------|-----------|-----------|------|------|---------------------|--------------|
| Kolyma_River.SG | Kolyma_9750BP  | nEA | Russia | ancient | 9775 | N.A. | 68.6      | 159.1     | N.A. | N.A. | Sikora_et_al_2019   | PASS (qpAdm) |
| IK002.SG        | Jomon_2800BP   | nEA | Japan  | ancient | 2782 | N.A. | 35.0183   | 137.294   | N.A. | N.A. | McColl_et_al_2018   | PASS (qpAdm) |
| RISE515.SG      | Okunevo_4300BP | nEA | Russia | ancient | 4196 | N.A. | 53.156486 | 90.207811 | N.A. | N.A. | Damgaard_et_al_2018 | PASS (qpAdm) |
| RISE667.SG      | Okunevo_4300BP | nEA | Russia | ancient | 4300 | N.A. | 53.156486 | 90.207811 | N.A. | N.A. | Damgaard_et_al_2018 | PASS (qpAdm) |
| RISE670.SG      | Okunevo_4300BP | nEA | Russia | ancient | 3959 | N.A. | 53.156486 | 90.207811 | N.A. | N.A. | Damgaard_et_al_2018 | PASS (qpAdm) |
| RISE671.SG      | Okunevo_4300BP | nEA | Russia | ancient | 4300 | N.A. | 53.156486 | 90.207811 | N.A. | N.A. | Damgaard_et_al_2018 | PASS (qpAdm) |
| RISE672.SG      | Okunevo_4300BP | nEA | Russia | ancient | 4300 | N.A. | 53.156486 | 90.207811 | N.A. | N.A. | Damgaard_et_al_2018 | PASS (qpAdm) |
| RISE674.SG      | Okunevo_4300BP | nEA | Russia | ancient | 4064 | N.A. | 53.156486 | 90.207811 | N.A. | N.A. | Damgaard_et_al_2018 | PASS (qpAdm) |
| RISE675.SG      | Okunevo_4300BP | nEA | Russia | ancient | 4517 | N.A. | 53.708561 | 90.359808 | N.A. | N.A. | Damgaard_et_al_2018 | PASS (qpAdm) |
| RISE677.SG      | Okunevo_4300BP | nEA | Russia | ancient | 4409 | N.A. | 53.708561 | 90.359808 | N.A. | N.A. | Damgaard_et_al_2018 | PASS (qpAdm) |
| RISE680.SG      | Okunevo_4300BP | nEA | Russia | ancient | 4300 | N.A. | 53.708561 | 90.359808 | N.A. | N.A. | Damgaard_et_al_2018 | PASS (qpAdm) |
| RISE681.SG      | Okunevo_4300BP | nEA | Russia | ancient | 4300 | N.A. | 53.708561 | 90.359808 | N.A. | N.A. | Damgaard_et_al_2018 | PASS (qpAdm) |
| RISE683.SG      | Okunevo_4300BP | nEA | Russia | ancient | 3973 | N.A. | 53.708561 | 90.359808 | N.A. | N.A. | Damgaard_et_al_2018 | PASS (qpAdm) |
| RISE684.SG      | Okunevo_4300BP | nEA | Russia | ancient | 4239 | N.A. | 53.708561 | 90.359808 | N.A. | N.A. | Damgaard_et_al_2018 | PASS (qpAdm) |
| RISE685.SG      | Okunevo_4300BP | nEA | Russia | ancient | 4300 | N.A. | 53.708561 | 90.359808 | N.A. | N.A. | Damgaard_et_al_2018 | PASS (qpAdm) |
| RISE719.SG      | Okunevo_4300BP | nEA | Russia | ancient | 4300 | N.A. | 54.371767 | 91.506856 | N.A. | N.A. | Damgaard_et_al_2018 | PASS (qpAdm) |

378  
379
